# Supplementary material for: Concise total synthesis and structure revision of metacridamides A and B
Source: Royal Society of Chemistry journal article supplement (doi:10.1039/d3cc01694c), 2023-01-01

## Supporting Information

### Concise Total Synthesis and Structure Revision of Metacridamides A and B

Masahito Yoshida<sup>1,2,\*</sup>, Yuhi Okoshi<sup>1</sup>, and Hideo Kigoshi<sup>1,2,3</sup>

<sup>1</sup>Degree Programs in Pure and Applied Sciences, University of Tsukuba,  
1-1-1 Tennodai, Tsukuba, Ibaraki 305-8571, Japan

<sup>2</sup>Department of Chemistry, Faculty of Pure and Applied Sciences, University of Tsukuba,  
1-1-1 Tennodai, Tsukuba, Ibaraki 305-8571, Japan

<sup>3</sup>Alliance for Research on the Mediterranean and North Africa (ARENA), University of Tsukuba,  
1-1-1 Tennodai, Tsukuba, Ibaraki 305-8572, Japan

#### Contents

|                                                |         |
|------------------------------------------------|---------|
| Experimental Procedure for Synthetic Compounds | S1–S18  |
| NMR Spectra                                    | S19–S64 |
| References                                     | S65     |

## Experimental Section

### I. Basic procedure

- a) All moisture-sensitive reactions were performed under an atmosphere of nitrogen using heat-dried flasks, syringes, etc., and the starting materials were azeotropically dried with toluene before use.
- b) The reaction system was cooled in an ice-water bath (0 °C), a dry ice-methanol bath (-78 °C), and a thermostatic ethanol bath (-78 ~ 0 °C). An oil bath was used to heat the reaction system.
- c) The organic layer after extraction was dried by addition of Na<sub>2</sub>SO<sub>4</sub> with vigorously stirring, and the solid was removed by filtration.
- d) Concentration on a rotary evaporator was carried out under reduced pressure (10~100 mmHg) using a diaphragm pump. The residual solvent was removed using a vacuum pump (approx. 1 mmHg) fitted with a trap cooled by liquid nitrogen.
- e) Celite® No. 535 purchased from Wako Pure Chemicals Co. was used for Celite filtration.
- f) The ratio of mixed solvents is expressed as a volume ratio.

### II. Chromatography

#### a) Analytical thin layer chromatography

E. Merck TLC plates, TLC Silica gel 60 F<sub>254</sub>, were used; detection of compounds on the TLC plates was performed by UV lamp (254 nm) irradiation and the use of the following colorant. R<sub>f</sub> values are listed as below.

R<sub>f</sub> = numerical value (developing solvents)

(Colorant)

#### Phosphomolybdic acid solution

12 Molybdo(IV) phosphoric acid (50 g) was dissolved in ethanol (450 mL).

The TLC plate was immersed in this solution and then heated on a hot plate (300 °C).

#### b) Column chromatography

Silica gel BW-820MH or PSQ 100B purchased from Fuji Silysia Chemical Ltd. was used as the filler. The packing materials and developing solvents used are listed below.

[filler, filler weight, developing solvents]

### III. Instrumental analysis

#### a) Specific rotation ( $[\alpha]_D^t$ )

The instrument used was a digital optical rotation meter (DIP-1000) manufactured by JASCO Co. Chloroform through alumina [E. Merck Aluminium oxide 90 active neutral (activity stage I) for column chromatography], methanol for HPLC, or acetonitrile for HPLC was used as a measuring solvent. The measured values are listed as below, where  $t$  is the measurement temperature ( $^{\circ}\text{C}$ ) and the unit of concentration of the solution is given as g / dL.

$$[\alpha]_D^t \text{ specific rotation (} c \text{ concentration, solvent)}$$

#### b) Infrared absorption spectrum (IR)

The instrument used was a spectrophotometer (FT/IR-4100) manufactured by JASCO Co. Chloroform through alumina [E. Merck Aluminium oxide 90 active neutral (activity stage I) for column chromatography] was used as the measurement solvent. The chloroform solution of the sample was placed in a dedicated NaCl cell and the measured values are listed as below.

$$\text{IR (CHCl}_3\text{) absorption wavelength (cm}^{-1}\text{)}$$

#### c) $^1\text{H}$ nuclear magnetic resonance spectrum ( $^1\text{H}$ NMR spectrum)

A Bruker DPX400 instrument (400 MHz) or an Avance600 instrument (600 MHz) was used for the measurements. Heavy chloroform ( $\text{CDCl}_3$ ) and heavy methanol (methanol- $d_4$ ) were used as the measurement solvents. The measured values are listed as below.

$^1\text{H}$  NMR (Measuring frequency, solvent)  $\delta$  Chemical shift value (multiplicity, spin coupling value, a number of hydrogen)

Chemical shift values are listed as  $\delta$  values (ppm), and residual protons of the measuring solvent [ $\text{CHCl}_3$  ( $\delta$  7.26),  $\text{CHD}_2\text{OD}$  ( $\delta$  3.31)] were used as internal standards. Multiplicities were abbreviated as s (singlet), d (doublet), t (triplet), q (quartet), m (multiplet, or overlap of multiple signals), and the broad signals were represented by the remark "br". The spin coupling constant  $J$  is listed in Hz.

#### d) $^{13}\text{C}$ nuclear magnetic resonance spectrum ( $^{13}\text{C}$ NMR spectrum)

A Bruker DPX400 instrument (100 MHz) or an Avance600 instrument (150 MHz) was used for the measurements. Heavy chloroform ( $\text{CDCl}_3$ ) and heavy methanol (methanol- $d_4$ ) were used as the measurement solvents. The measured values are listed as below.

$$^{13}\text{C NMR (Measuring frequency, solvent) } \delta \text{ Chemical shift value}$$

Chemical shift values are listed as  $\delta$  values (ppm), and carbon signals of the measuring solvent [ $\text{CDCl}_3$  ( $\delta$  77.00), methanol- $d_4$  ( $\delta$  49.00)] were used as internal standards.

f) High resolution mass spectrometry (HRMS)

The instrument used was JEOL AccuTOF CS (JMS-100CS), and measurements were performed by electron spray ionization (ESI). Methanol for HPLC was used as the measuring solvent and reserpine ( $m/z$  609.2812) as the calibrant. The measured values are listed as below.

HRMS [ESI] calcd for molecular formula [ion] calculated value, found measured value.

IV. Preparation of solvents

Dehydrated Solvents

Dry Et<sub>2</sub>O, THF, DMF, EtOAc, MeCN, and MeOH were purchased from FUJIFILM Wako Pure Chemical Co. and used without further drying. Dry CH<sub>2</sub>Cl<sub>2</sub> was purchased from FUJIFILM Wako Pure Chemical Co. and used after distillation: CH<sub>2</sub>Cl<sub>2</sub> was dried by refluxing with powdered CaH<sub>2</sub> for at least 2 hours and then distilled.

## Experimental procedure

### Acylated oxazolidinone **12**

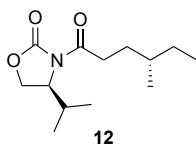

To a stirred solution of carboxylic acid **10**<sup>1</sup> (8.37 g, 64.3 mmol) in dry THF (300 mL, 4.67 mL/mmol) were added NEt<sub>3</sub> (17.9 mL, 129 mmol, 2.00 equiv) and PivCl (9.40 mL, 77.2 mmol, 1.20 equiv) dropwise at -78 °C under N<sub>2</sub>. After being stirred at room temperature for 1 h, (*S*)-4-isopropyl-2-oxazolidinone (**11**) (9.47 g, 77.2 mmol, 1.20 equiv) and anhydrous LiCl (8.18 g, 193 mmol, 3.00 equiv) were added to the reaction mixture. After being stirred at the same temperature for 24 h, the reaction mixture was quenched with H<sub>2</sub>O. The organic layer was separated, and the aqueous layer was extracted with Et<sub>2</sub>O (100 mL x 3). The combined organic layers were washed with brine, dried over Na<sub>2</sub>SO<sub>4</sub>, and filtered. The filtrate was concentrated in vacuo, and the residual oil was purified by column chromatography on silica gel (PSQ 100B 160 g, hexane/EtOAc = 18/1) to afford acylated oxazolidinone **12** (16.0 g, 64.3 mmol, quant) as a colorless oil.

$R_f$  = 0.58 (hexane/EtOAc = 3/1);  $[\alpha]_D^{23}$  +71.3 (*c* 1.49, CHCl<sub>3</sub>); IR (CHCl<sub>3</sub>) 3028, 2965, 2932, 2876, 1780, 1700, 1487, 1464, 1388, 786 cm<sup>-1</sup>; <sup>1</sup>H NMR (400 MHz, CDCl<sub>3</sub>) δ 4.43–4.40 (m, 1H), 4.24 (t, *J* = 9.0 Hz, 1H), 4.18 (dd, *J* = 9.0, 3.1 Hz, 1H), 2.99 (ddd, *J* = 16.1, 10.6, 5.7 Hz, 1H), 2.82 (ddd, *J* = 16.1, 10.3, 6.1 Hz, 1H), 2.39–2.31 (m, 1H), 1.70–1.61 (m, 1H), 1.51–1.43 (m, 1H), 1.42–1.31 (m, 2H), 1.21–1.13 (m, 1H), 0.90–0.84 (m, 12H); <sup>13</sup>C NMR (100 MHz, CDCl<sub>3</sub>) δ 173.8, 154.2, 63.4, 58.5, 34.2, 33.5, 31.2, 29.3, 28.5, 19.0, 18.1, 14.8, 11.4; HRMS [ESI] calcd for C<sub>13</sub>H<sub>23</sub>NO<sub>3</sub>Na [M+Na]<sup>+</sup> 264.1576, found 264.1600.

### Alkylated product **13**

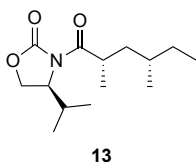

To a stirred solution of acylated oxazolidinone **12** (3.96 g, 18.1 mmol) in dry THF (180 mL, 10.0 mL/mmol) was added 1.2 M solution of NaHMDS in THF (20.3 mL, 24.4 mmol, 1.30 equiv) dropwise at -78 °C under N<sub>2</sub>. After the reaction mixture was stirred at the same temperature for 1 h, MeI (2.93 mL, 47.1 mmol, 2.60 equiv) in dry THF (27.2 mL, 1.50 mL/mmol) was added dropwise to the reaction mixture. After being stirred at the same temperature for 1 h, the reaction mixture was quenched with saturated aqueous NaHCO<sub>3</sub>. The organic layer was separated, and the aqueous layer was extracted with Et<sub>2</sub>O (100 mL x 3). The combined organic layers were washed with brine, dried over Na<sub>2</sub>SO<sub>4</sub>, and filtered. The filtrate was concentrated in vacuo, and the residual oil was purified by column chromatography on silica gel (PSQ 100B 100 g, hexane/EtOAc = 22/1) to afford alkylated product **13** (3.55 g, 13.9 mmol, 77%) as a colorless oil.

$R_f$  = 0.75 (hexane/EtOAc = 3/1);  $[\alpha]_D^{23}$  +65.7 (*c* 1.17, CHCl<sub>3</sub>); IR (CHCl<sub>3</sub>) 3029, 2966, 2932, 2876, 1779, 1698, 1387, 1203, 1093 cm<sup>-1</sup>; <sup>1</sup>H NMR (400 MHz, CDCl<sub>3</sub>) δ 4.45–4.41 (m, 1H), 4.25 (t, *J* = 8.9 Hz, 1H), 4.18 (dd, *J* = 8.9, 3.0 Hz, 1H), 3.92–3.83 (m, 1H), 2.38–2.27 (m, 1H), 1.85–1.79 (m, 1H), 1.38–1.23 (m, 2H), 1.18 (d, *J* = 6.9

Hz, 3H), 1.13–1.05 (m, 2H), 0.89 (d,  $J = 7.0$  Hz, 3H), 0.86–0.82 (m, 9H);  $^{13}\text{C}$  NMR (100 MHz,  $\text{CDCl}_3$ )  $\delta$  177.6, 153.8, 63.4, 58.6, 40.3, 35.6, 32.5, 29.8, 28.6, 19.5, 19.1, 18.1, 14.9, 11.5; HRMS [ESI] calcd for  $\text{C}_{14}\text{H}_{25}\text{NO}_3\text{Na}$   $[\text{M}+\text{Na}]^+$  278.1732, found 278.1739.

#### Aldehyde **8**

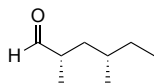

**8**

To a stirred solution of alkylated product **13** (500 mg, 1.96 mmol) in dry  $\text{CH}_2\text{Cl}_2$  (16.2 mL, 8.30 mL/mmol) was added 1.02 M solution of DIBAL-H in  $\text{CH}_2\text{Cl}_2$  (3.84 mL, 3.92 mmol, 2.00 equiv) dropwise at  $-78$  °C under  $\text{N}_2$ . After being stirred at the same temperature for 15 min, the reaction mixture was quenched with saturated aqueous  $\text{NH}_4\text{Cl}$ , and then a saturated aqueous Rochelle salt was added. The organic layer was separated, and the aqueous layer was extracted with pentane (20 mL x 2). The combined organic layers were washed with brine, dried over  $\text{Na}_2\text{SO}_4$ , and filtered. The filtrate was concentrated, and the residual oil was purified by distillation under reduced pressure (1.9 kPa,  $66$  °C– $70$  °C) to afford aldehyde **8** (131 mg, 1.02 mmol, 52%) as a colorless oil.

$R_f = 0.50$  (hexane/EtOAc = 10/1);  $[\alpha]_{\text{D}}^{23} +30.8$  ( $c$  0.367  $\text{CHCl}_3$ ); IR ( $\text{CHCl}_3$ ) 2965, 2931, 2876, 1720, 1462, 1222  $\text{cm}^{-1}$ ;  $^1\text{H}$  NMR (400 MHz,  $\text{CDCl}_3$ )  $\delta$  9.58 (d,  $J = 2.5$  Hz, 1H), 2.48–2.38 (m, 1H), 1.75–1.68 (m, 1H), 1.46–1.31 (m, 2H), 1.19–1.10 (m, 2H), 1.08 (d,  $J = 6.9$  Hz, 3H), 0.89 (d,  $J = 6.5$  Hz, 3H), 0.87 (t,  $J = 7.4$  Hz, 3H);  $^{13}\text{C}$  NMR (100 MHz,  $\text{CDCl}_3$ )  $\delta$  205.8, 44.4, 38.1, 32.2, 29.4, 19.6, 14.4, 11.3; HRMS [ESI] calcd for  $\text{C}_8\text{H}_{16}\text{ONa}$   $[\text{M}+\text{Na}]^+$  151.1099, found 151.1123.

#### Alcohol **14**

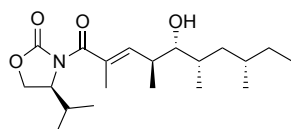

**14**

To a stirred solution of aldehyde **8** (1.08 g, 8.43 mmol, 3.00 equiv) in dry  $\text{CH}_2\text{Cl}_2$  (32.0 mL, 11.4 mL/mmol) was added 1.0 M solution of  $\text{TiCl}_4$  in  $\text{CH}_2\text{Cl}_2$  (4.22 mL, 4.22 mmol, 1.50 equiv) dropwise at  $-78$  °C under  $\text{N}_2$ . After the reaction mixture was stirred at the same temperature for 30 min, a solution of *N,O*-ketene acetal **7** (952 mg, 2.81 mmol) in dry  $\text{CH}_2\text{Cl}_2$  (64.6 mL, 23.0 mL/mmol) was added to the reaction mixture. After being stirred at  $-40$  °C for 24 h, the reaction mixture was quenched with saturated aqueous  $\text{NaHCO}_3$ , and then saturated aqueous Rochelle salt was added. The organic layer was separated, and the aqueous layer was extracted with EtOAc (30 mL x 3). The combined organic layers were washed with brine, dried over  $\text{Na}_2\text{SO}_4$ , and filtered. The filtrate was concentrated in vacuo, and the residual oil was purified by column chromatography on silica gel (PSQ 100B 35.4 g, hexane/EtOAc = 15/1) to afford alcohol **14** (963 mg, 2.81 mmol, 97%) as a colorless oil.

$R_f = 0.48$  (hexane/EtOAc = 3/1);  $[\alpha]_{\text{D}}^{23} +13.3$  ( $c$  1.01,  $\text{CHCl}_3$ ); IR ( $\text{CHCl}_3$ ) 3526, 3018, 2965, 2932, 2876, 1772, 1685, 1463, 1389, 1016  $\text{cm}^{-1}$ ;  $^1\text{H}$  NMR (400 MHz,  $\text{CDCl}_3$ )  $\delta$  5.78 (brd,  $J = 10.3$  Hz, 1H), 4.57 (ddd,  $J = 9.0, 5.8, 4.6$  Hz, 1H), 4.33 (t,  $J = 9.0$  Hz, 1H), 4.18 (dd,  $J = 9.0, 5.8$  Hz, 1H), 3.25 (d,  $J = 9.0$  Hz, 1H), 3.07 (brs, 1H), 2.78–2.68 (m, 1H), 2.38–2.30 (m, 1H), 1.94 (d,  $J = 1.3$  Hz, 3H), 1.82–1.77 (m, 1H), 1.54–1.39 (m, 2H), 1.37–1.33

(m, 1H), 1.14–1.03 (m, 2H), 0.94–0.83 (m, 18H);  $^{13}\text{C}$  NMR (100 MHz,  $\text{CDCl}_3$ )  $\delta$  171.8, 154.7, 142.8, 131.3, 76.5, 63.6, 58.2, 41.8, 37.6, 31.5, 30.9, 29.7, 28.6, 19.5, 18.0, 15.7, 15.4, 14.1, 12.9, 11.4; HRMS [ESI] calcd for  $\text{C}_{20}\text{H}_{35}\text{NO}_4\text{Na}$   $[\text{M}+\text{Na}]^+$  376.2464, found 376.2436.

#### TIPS Ether **15**

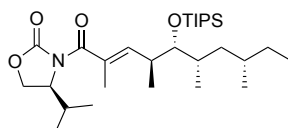

**15**

To a solution of alcohol **14** (247 mg, 0.699 mmol) in dry  $\text{CH}_2\text{Cl}_2$  (1.94 mL, 2.78 mL/mmol) were added 2,6-lutidine (0.814 mL, 6.99 mmol, 10.0 equiv) and TIPSOTf (0.28 mL, 1.05 mmol, 1.50 equiv) at 0 °C under  $\text{N}_2$ . After being stirred at room temperature for 12 h, the reaction mixture was quenched with  $\text{H}_2\text{O}$  at 0 °C. The organic layer was separated, and the aqueous layer was extracted with EtOAc (10 mL x 3). The combined organic layers were washed with aqueous 1 M HCl, saturated aqueous  $\text{NaHCO}_3$ , and brine, successively; dried over  $\text{Na}_2\text{SO}_4$ ; filtered; and then concentrated in vacuo. The residual oil was purified by column chromatography on silica gel (PSQ 100B 8.0 g, hexane/EtOAc = 21/1) to afford TIPS ether **15** (374 mg, 0.734 mmol, quant) as a colorless oil.

$R_f$  = 0.70 (hexane/EtOAc = 3/1);  $[\alpha]_D^{23}$  +2.38 (*c* 1.11,  $\text{CHCl}_3$ ); IR ( $\text{CHCl}_3$ ) 2965, 2868, 1784, 1682, 1464, 1387, 1015  $\text{cm}^{-1}$ ;  $^1\text{H}$  NMR (400 MHz,  $\text{CDCl}_3$ )  $\delta$  5.78 (brd,  $J$  = 9.7 Hz, 1H), 4.47–4.23 (m, 1H), 4.27 (t,  $J$  = 9.0 Hz, 1H), 4.18 (dd,  $J$  = 9.0, 5.1 Hz, 1H), 3.70 (t,  $J$  = 3.4 Hz, 1H), 2.77–2.69 (m, 1H), 2.41–2.36 (m, 1H), 1.90 (d,  $J$  = 1.3 Hz, 3H), 1.77–1.73 (m, 1H), 1.42–1.36 (m, 3H), 1.09–1.05 (m, 26H), 0.92–0.88 (m, 9H), 0.85–0.81 (m, 6H);  $^{13}\text{C}$  NMR (100 MHz,  $\text{CDCl}_3$ )  $\delta$  172.1, 153.6, 141.6, 129.7, 80.3, 63.5, 58.6, 41.1, 37.3, 35.4, 32.1, 28.4, 20.3, 18.6, 18.0, 17.8, 17.5, 16.3, 15.1, 14.0, 13.6, 12.4, 11.5; HRMS [ESI] calcd for  $\text{C}_{29}\text{H}_{55}\text{NO}_4\text{SiNa}$   $[\text{M}+\text{Na}]^+$  532.3798, found 532.3784.

#### $\alpha,\beta$ -Unsaturated aldehyde **6**

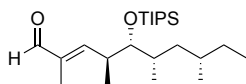

**6**

To a stirred solution of TIPS ether **15** (306 mg, 0.601 mmol) in dry  $\text{CH}_2\text{Cl}_2$  (19.2 mL, 32.0 mL/mmol) was added 1.02 M solution of DIBAL-H in  $\text{CH}_2\text{Cl}_2$  (1.18 mL, 1.20 mmol, 1.20 equiv) dropwise at –78 °C under  $\text{N}_2$ . After being stirred at the same temperature for 15 min, the reaction mixture was quenched with MeOH, and then a saturated aqueous Rochelle salt was added. The organic layer was separated, and the aqueous layer was extracted with EtOAc (20 mL x 3). The combined organic layers were washed with brine, dried over  $\text{Na}_2\text{SO}_4$ , and filtered. The filtrate was concentrated in vacuo, and the residual oil was purified by column chromatography on silica gel (PSQ 100B 6.00 g, hexane/EtOAc = 30/1) to afford unsaturated aldehyde **6** (181 mg, 0.473 mmol, 79%) as a colorless oil.

$R_f$  = 0.60 (hexane/EtOAc = 5/1);  $[\alpha]_D^{23}$  –12.5 (*c* 0.775  $\text{CHCl}_3$ ); IR ( $\text{CHCl}_3$ ) 2963, 2928, 2869, 1679, 1463, 1377, 1097  $\text{cm}^{-1}$ ;  $^1\text{H}$  NMR (400 MHz,  $\text{CDCl}_3$ )  $\delta$  9.39 (s, 1H), 6.76 (d,  $J$  = 9.7 Hz, 1H), 3.78 (t,  $J$  = 3.4 Hz, 1H), 2.93–2.86 (m, 1H), 1.76 (d,  $J$  = 0.9 Hz, 3H), 1.77–1.71 (m, 1H), 1.39–1.34 (m, 3H), 1.12–1.08 (m, 25H), 0.98–0.92 (m, 1H), 0.90 (d,  $J$  = 6.9 Hz, 3H), 0.84–0.81 (m, 6H);  $^{13}\text{C}$  NMR (100 MHz,  $\text{CDCl}_3$ )  $\delta$  195.8, 158.4, 137.6, 80.7, 40.4, 37.2,

36.3, 32.2, 28.4, 20.4, 18.60, 18.55, 18.4, 16.4, 13.7, 11.5, 9.5; HRMS [ESI] calcd for C<sub>23</sub>H<sub>46</sub>O<sub>2</sub>SiNa [M+Na]<sup>+</sup> 405.3165, found 405.3146.

### Alcohol **16**

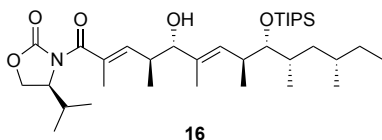

To a stirred solution of unsaturated aldehyde **6** (98.0 mg, 0.256 mmol) in dry CH<sub>2</sub>Cl<sub>2</sub> (1.33 mL, 5.10 mL/mmol) were added 1.0 M solution of TiCl<sub>4</sub> in CH<sub>2</sub>Cl<sub>2</sub> (0.130 mL, 0.130 mmol, 0.500 equiv) and a solution of *N,O*-ketene acetal **7** (132 mg, 0.394 mmol, 1.50 equiv) in dry CH<sub>2</sub>Cl<sub>2</sub> (1.33 mL, 5.10 mL/mmol) dropwise at -78 °C under N<sub>2</sub>. After being stirred at -40 °C for 24 h, the reaction mixture was quenched with saturated aqueous NaHCO<sub>3</sub>, and then a saturated aqueous Rochelle salt was added. The organic layer was separated, and the aqueous layer was extracted with EtOAc (10 mL x 3). The combined organic layers were washed with brine, dried over Na<sub>2</sub>SO<sub>4</sub>, and filtered. The filtrate was concentrated in vacuo, and the residual oil was purified by column chromatography on silica gel (PSQ 100B 4.00 g, hexane/EtOAc = 12/1) to afford alcohol **16** (56.9 mg, 0.0936 mol, 36%) as a colorless oil *R<sub>f</sub>* = 0.52 (hexane/EtOAc = 3/1); [α]<sub>D</sub><sup>23</sup> -7.61 (*c* 0.775, CHCl<sub>3</sub>); IR (CHCl<sub>3</sub>) 3516, 2964, 2946, 2929, 2869, 1774, 1685, 1389, 1015 cm<sup>-1</sup>; <sup>1</sup>H NMR (400 MHz, CDCl<sub>3</sub>) δ 5.80 (brd, *J* = 10.3, 1H), 5.52 (d, *J* = 9.2 Hz, 1H), 4.59–4.55 (m, 1H), 4.34 (t, *J* = 9.0 Hz, 1H), 4.19 (dd, *J* = 9.0, 5.8 Hz, 1H), 3.66–3.64 (m, 2H), 3.15 (brs, 1H), 2.75–2.65 (m, 2H), 2.39–2.31 (m, 1H), 1.98 (d, *J* = 1.2 Hz, 3H), 1.77–1.70 (m, 1H), 1.67 (s, 3H), 1.41–1.34 (m, 3H), 1.12–1.04 (m, 23H), 1.00 (d, *J* = 7.0 Hz, 3H), 0.94–0.92 (m, 6H), 0.88 (d, *J* = 6.8 Hz, 3H), 0.83–0.80 (m, 9H); <sup>13</sup>C NMR (100 MHz, CDCl<sub>3</sub>) δ 171.7, 154.6, 142.3, 133.0, 132.4, 131.9, 82.4, 80.1, 63.6, 58.3, 41.9, 38.3, 37.1, 34.9, 32.0, 28.6, 28.5, 20.2, 18.7, 18.6, 18.3, 18.0, 16.4, 16.3, 15.4, 14.1, 13.6, 11.4, 11.2; HRMS [ESI] calcd for C<sub>35</sub>H<sub>65</sub>NO<sub>5</sub>SiNa [M+Na]<sup>+</sup> 630.4530, found 630.4558.

### (*S*)-MTPA Ester **S1**

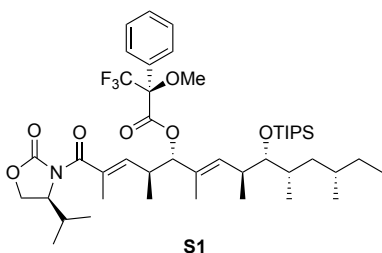

To a stirred solution of alcohol **33** (3.00 mg, 4.93 mmol) in dry pyridine (0.0493 mL, 10.0 mL/mmol) was added (*R*)-(-)- $\alpha$ -methoxy- $\alpha$ -trifluoromethylphenylacetyl chloride (4.61 mL, 0.0247 mmol, 5.00 equiv) dropwise at 0 °C under N<sub>2</sub>. After being stirred at room temperature for 12 h, the reaction mixture was quenched with a saturated aqueous NaHCO<sub>3</sub>. The organic layer was separated, and the aqueous layer was extracted with EtOAc (10 mL x 3). The combined organic layers were washed with aqueous 1 M HCl, saturated aqueous NaHCO<sub>3</sub>, and brine, successively; dried over Na<sub>2</sub>SO<sub>4</sub>; filtered; and then concentrated in vacuo. The residual oil was purified by column chromatography on silica gel (PSQ-100B 100 mg, hexane/EtOAc = 15/1) to afford (*S*)-MTPA ester **S1** (2.70 mg, 3.28 mmol, 67%) as a colorless oil.



$R_f = 0.60$  (hexane/EtOAc = 3/1);  $^1\text{H NMR}$  (400 MHz,  $\text{CDCl}_3$ )  $\delta$  7.50–7.48 (m, 2H), 7.34–7.32 (m, 3H), 5.81 (brd,  $J = 9.0$  Hz, 1H), 5.75 (brd,  $J = 9.7$  Hz, 1H), 5.29 (d,  $J = 9.0$  Hz, 1H), 4.46–4.42 (m, 1H), 4.29 (t,  $J = 9.0$  Hz, 1H), 4.18 (dd,  $J = 9.0, 4.6$  Hz, 1H), 3.66 (t,  $J = 2.9$  Hz, 1H), 3.53 (s, 3H), 2.92–2.82 (m, 1H), 2.68–2.64 (m, 1H), 2.44–2.36 (m, 1H) 1.78 (d,  $J = 1.2$  Hz, 3H), 1.76–1.71 (m, 1H), 1.68 (d,  $J = 0.96$  Hz, 3H), 1.38–1.32 (m, 3H), 1.14–1.07 (m, 21H), 1.02 (d,  $J = 7.0$  Hz, 3H), 0.93–0.86 (m, 14H), 0.82–0.75 (m, 6H); HRMS [ESI] calcd for  $\text{C}_{45}\text{H}_{72}\text{F}_3\text{NO}_7\text{SiNa}$   $[\text{M}+\text{Na}]^+$  846.4928, found 846.4928.

#### (*R*)-MTPA Ester **S2**

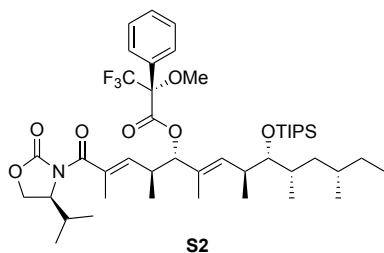

Alcohol **33** (3.00 mg, 4.93 mmol) was acylated with (*S*)-(+)- $\alpha$ -methoxy- $\alpha$ -trifluoromethylphenylacetyl chloride according to the procedure reported above to give (*R*)-MTPA ester **33R** (2.61 mg, 3.16 mmol, 64%) as a colorless oil.

$R_f = 0.61$  (hexane/EtOAc = 3/1);  $^1\text{H NMR}$  (400 MHz,  $\text{CDCl}_3$ )  $\delta$  7.51–7.47 (m, 2H), 7.37–7.35 (m, 3H), 5.81–5.77 (m, 2H), 5.16 (d,  $J = 9.6$  Hz, 1H), 4.48–4.44 (m, 1H), 4.31 (t,  $J = 9.0$  Hz, 1H), 4.19 (dd,  $J = 9.0, 4.6$  Hz, 1H), 3.66 (t,  $J = 2.6$  Hz, 1H), 3.50 (s, 3H), 2.92–2.82 (m, 1H), 2.63–2.60 (m, 1H), 2.43–2.35 (m, 1H) 1.87 (d,  $J = 1.4$  Hz, 3H), 1.74–1.71 (m, 1H), 1.46 (d,  $J = 0.9$  Hz, 3H), 1.45–1.37 (m, 3H), 1.14–1.07 (m, 21H), 1.02–0.97 (m, 4H), 0.93–0.82 (m, 19H); HRMS [ESI] calcd for  $\text{C}_{45}\text{H}_{72}\text{F}_3\text{NO}_7\text{SiNa}$   $[\text{M}+\text{Na}]^+$  846.4928, found 846.4947.

#### *syn*-Alcohol **17**

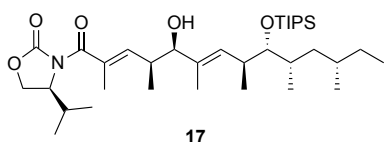

To a stirred solution of unsaturated aldehyde **6** (100 mg, 0.261 mmol) in dry  $\text{CH}_2\text{Cl}_2$  (3.00 mL, 11.6 mL/mmol) were added 1.0 M solution of  $\text{TiCl}_4$  in  $\text{CH}_2\text{Cl}_2$  (1.04 mL, 1.04 mmol, 4.00 equiv) and a solution of *N,O*-ketene acetal **7** (442 mg, 1.30 mmol, 5.00 equiv) in dry  $\text{CH}_2\text{Cl}_2$  (1.51 mL, 5.80 mL/mmol) dropwise at  $-78$  °C under  $\text{N}_2$ . After being stirred at  $-20$  °C for 24 h, the reaction mixture was quenched with saturated aqueous  $\text{NaHCO}_3$ , and then a saturated aqueous Rochelle salt was added. The organic layer was separated, and the aqueous layer was extracted with EtOAc (10 mL x 3). The combined organic layers were washed with brine, dried over  $\text{Na}_2\text{SO}_4$ , and filtered. The filtrate was concentrated in vacuo, and the residual oil was purified by column chromatography on silica gel (PSQ 100B 2.00 g, hexane/EtOAc = 12/1) to afford *syn*-alcohol **17** (91.7 mg, 0.151 mol, 58%) as a colorless oil.

$R_f = 0.52$  (hexane/EtOAc = 3/1);  $[\alpha]_{\text{D}}^{23} +47.7$  ( $c$  1.00,  $\text{CHCl}_3$ ); IR ( $\text{CHCl}_3$ ) 3522, 3030, 2965, 2867, 1778, 1681, 1462, 1387, 883, 671  $\text{cm}^{-1}$ ;  $^1\text{H NMR}$  (400 MHz,  $\text{CDCl}_3$ )  $\delta$  6.02 (brd,  $J = 9.7$ , 1H), 5.60 (d,  $J = 9.5$  Hz, 1H), 4.56–4.52 (m, 1H), 4.32 (t,  $J = 9.0$  Hz, 1H), 4.17 (dd,  $J = 9.0, 5.4$  Hz, 1H), 4.13–4.11 (m, 1H), 3.64 (t,  $J = 3.5$ , 1H), 2.80–2.72 (m, 1H), 2.69–2.60 (m, 1H), 2.36–2.34 (brs, 1H), 2.39–2.26 (m, 1H) 1.95 (d,  $J = 1.4$  Hz, 3H), 1.78–1.73 (m, 1H),

1.61 (d,  $J = 1.0$  Hz, 3H), 1.41–1.35 (m, 3H), 1.10–1.06 (m, 22H), 1.02–0.97 (m, 4H), 0.96–0.88 (m, 12H), 0.84–0.81 (m, 6H);  $^{13}\text{C}$  NMR (100 MHz,  $\text{CDCl}_3$ )  $\delta$  171.6, 154.1, 142.9, 133.3, 129.8, 129.7, 79.9, 78.3, 63.4, 58.2, 42.0, 37.22, 37.16, 34.4, 31.9, 28.6, 28.4, 20.0, 18.5, 18.4, 18.0, 17.8, 15.9, 15.1, 14.0, 13.6, 13.4, 13.1, 11.3; HRMS [ESI] calcd for  $\text{C}_{35}\text{H}_{65}\text{NO}_5\text{SiNa}$   $[\text{M}+\text{Na}]^+$  630.4530, found 630.4530.

#### (*S*)-MTPA ester **S3**

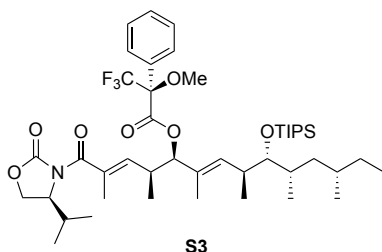

*syn*-Alcohol **34** (3.00 mg, 4.93 mmol) was acylated with (*R*)-(-)- $\alpha$ -methoxy- $\alpha$ -trifluoromethylphenyl acetyl chloride according to the above procedure for **S1** to give (*S*)-MTPA ester **S3** (2.50 mg, 62%) as a colorless oil.

$R_f = 0.60$  (hexane/EtOAc = 3/1);  $^1\text{H}$  NMR (400 MHz,  $\text{CDCl}_3$ )  $\delta$  7.51–7.49 (m, 2H), 7.39–7.36 (m, 3H), 5.76 (d,  $J = 8.8$  Hz, 1H), 5.63 (d,  $J = 10.0$  Hz, 1H), 5.27 (d,  $J = 7.3$  Hz, 1H), 4.42–4.38 (m, 1H), 4.26 (t,  $J = 9.0$  Hz, 1H), 4.16 (dd,  $J = 9.0, 4.5$  Hz, 1H), 3.63 (t,  $J = 3.5$  Hz, 1H), 3.53 (s, 3H), 2.93–2.87 (m, 1H), 2.60–2.56 (m, 1H), 2.43–2.34 (m, 1H) 1.90 (d,  $J = 1.3$  Hz, 3H), 1.71–1.61 (m, 1H), 1.46 (d,  $J = 0.9$  Hz, 3H), 1.36–1.32 (m, 3H), 1.12–1.01 (m, 27H), 0.92–0.82 (m, 17H); HRMS [ESI] calcd for  $\text{C}_{45}\text{H}_{72}\text{F}_3\text{NO}_7\text{SiNa}$   $[\text{M}+\text{Na}]^+$  846.4928, found 846.4935.

#### (*R*)-MTPA ester **S4**

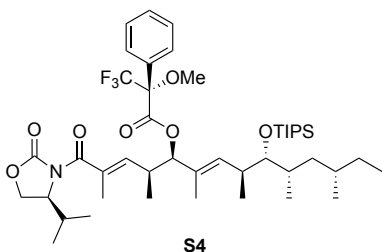

*syn*-Alcohol **34** (3.00 mg, 4.93 mmol) was acylated with (*S*)-(+)- $\alpha$ -Methoxy- $\alpha$ -trifluoromethylphenyl acetyl chloride according to the above procedure for **S1** to give (*R*)-MTPA ester **S4** (2.03 mg, 50%) as a colorless oil.

$R_f = 0.60$  (hexane/EtOAc = 3/1);  $^1\text{H}$  NMR (400 MHz,  $\text{CDCl}_3$ )  $\delta$  7.50–7.49 (m, 2H), 7.39–7.35 (m, 3H), 5.81 (d,  $J = 9.2$  Hz, 1H), 5.58 (brd,  $J = 10.0$  Hz, 1H), 5.35 (d,  $J = 8.0$  Hz, 1H), 4.41–4.37 (m, 1H), 4.26 (t,  $J = 9.0$  Hz, 1H), 4.16 (dd,  $J = 9.0, 4.5$  Hz, 1H), 3.64 (t,  $J = 3.0$  Hz, 1H), 3.53 (s, 3H), 2.89–2.84 (m, 1H), 2.64–2.59 (m, 1H), 2.42–2.35 (m, 1H) 1.87 (d,  $J = 1.3$  Hz, 3H), 1.68–1.65 (m, 1H), 1.61 (d,  $J = 1.0$  Hz, 3H), 1.45–1.34 (m, 3H), 1.12–1.07 (m, 21H), 1.02 (d,  $J = 7.0$  Hz, 3H), 0.96 (d,  $J = 6.7$  Hz, 3H), 0.92–0.82 (m, 17H); HRMS [ESI] calcd for  $\text{C}_{45}\text{H}_{72}\text{F}_3\text{NO}_7\text{SiNa}$   $[\text{M}+\text{Na}]^+$  846.4928, found 846.4938.

### $\alpha,\beta$ -Unsaturated aldehyde **18**

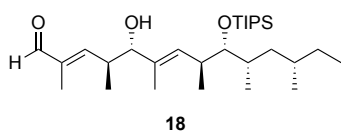

To a stirred solution of alcohol **16** (268 mg, 0.441 mmol) in dry  $\text{CH}_2\text{Cl}_2$  (14.1 mL, 32.0 mL/mmol) was added 1.02 M solution of DIBAL-H in  $\text{CH}_2\text{Cl}_2$  (1.29 mL, 1.32 mmol, 3.00 equiv) dropwise at  $-78\text{ }^\circ\text{C}$  under  $\text{N}_2$ . After being stirred at the same temperature for 15 min, the reaction mixture was quenched with MeOH, and then a saturated aqueous Rochelle salt was added. The organic layer was separated, and the aqueous layer was extracted with EtOAc (30 mL x 3). The combined organic layers were washed with brine, dried over  $\text{Na}_2\text{SO}_4$ , and filtered. The filtrate was concentrated in vacuo, and the residual oil was purified by column chromatography on silica gel (PSQ 100B 3.00 g, hexane/EtOAc = 21/1) to afford unsaturated aldehyde **18** (158 mg, 0.329 mmol, 75%) as a colorless oil.

$R_f$  = 0.71 (hexane/EtOAc = 3/1);  $[\alpha]_D^{23}$   $-25.1$  ( $c$  0.775  $\text{CHCl}_3$ ); IR ( $\text{CHCl}_3$ ) 3604, 2963, 2946, 2930, 1683, 1642, 1462, 1378, 1282, 1098, 1004, 883  $\text{cm}^{-1}$ ;  $^1\text{H}$  NMR (400 MHz,  $\text{CDCl}_3$ )  $\delta$  9.44 (s, 1H), 6.46 (brd,  $J$  = 9.6 Hz, 1H), 5.62 (d,  $J$  = 9.3 Hz, 1H), 3.87 (d,  $J$  = 8.7 Hz, 1H), 3.64 (t,  $J$  = 3.6 Hz, 1H), 2.94–2.85 (m, 1H), 2.69–2.61 (m, 1H), 1.80 (d,  $J$  = 1.2 Hz, 3H), 1.76–1.68 (m, 1H), 1.66 (d,  $J$  = 1.2 Hz, 3H), 1.41–1.36 (m, 3H), 1.13–1.07 (m, 22H), 1.01–0.93 (m, 1H), 1.00 (d,  $J$  = 7.0 Hz, 3H), 0.91 (d,  $J$  = 7.2 Hz, 3H), 0.89 (d,  $J$  = 7.2 Hz, 3H), 0.85–0.82 (m, 6H), one proton (OH) was not observed.

$^{13}\text{C}$  NMR (100 MHz,  $\text{CDCl}_3$ )  $\delta$  195.5, 157.5, 139.8, 133.6, 133.5, 82.8, 80.4, 41.6, 37.6, 36.8, 35.2, 32.1, 28.6, 20.3, 18.64, 18.62, 18.57, 16.6, 16.2, 13.7, 11.4, 11.3, 9.7; HRMS [ESI] calcd for  $\text{C}_{29}\text{H}_{56}\text{O}_3\text{SiNa}$   $[\text{M}+\text{Na}]^+$  503.3896, found 503.3866.

### Acetate **5**

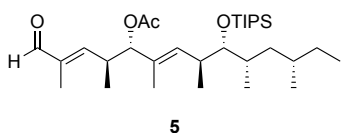

To a solution of unsaturated aldehyde **18** (150 mg, 0.312 mmol) in dry  $\text{CH}_2\text{Cl}_2$  (2.10 mL, 6.80 mL/mmol) were added pyridine (0.30 mL, 3.72 mmol, 12.0 equiv), AcCl (0.133 mL, 1.87 mmol, 6.00 equiv), and DMAP (52.5 mg, 0.468 mmol, 1.5 equiv) at  $0\text{ }^\circ\text{C}$  under  $\text{N}_2$ . After being stirred at room temperature for 4 h, the reaction mixture was quenched with saturated aqueous  $\text{NH}_4\text{Cl}$  at  $0\text{ }^\circ\text{C}$ . The organic layer was separated, and the aqueous layer was extracted with  $\text{Et}_2\text{O}$  (10 mL x 3). The combined organic layers were washed with aqueous 2 M NaOH, saturated aqueous  $\text{NH}_4\text{Cl}$ , and brine, successively; dried over  $\text{Na}_2\text{SO}_4$ ; filtered; and then concentrated in vacuo. The residual oil was purified by column chromatography on silica gel (PSQ-100B 3.00 g, hexane/EtOAc = 22/1) to afford acetate **5** (152 mg, 0.267 mmol, 91%) as a colorless oil.

$R_f$  = 0.73 (hexane/EtOAc = 3/1);  $[\alpha]_D^{23}$   $-2.47$  ( $c$  1.41,  $\text{CHCl}_3$ ); IR ( $\text{CHCl}_3$ ) 2963, 2946, 2930, 2868, 1732, 1684, 1462, 1372, 1243, 1094, 1065, 1015  $\text{cm}^{-1}$ ;  $^1\text{H}$  NMR (400 MHz,  $\text{CDCl}_3$ )  $\delta$  9.36 (s, 1H), 6.31 (brd,  $J$  = 10.0 Hz, 1H), 5.71 (d,  $J$  = 9.4 Hz, 1H), 5.12 (d,  $J$  = 9.1 Hz, 1H), 3.62 (t,  $J$  = 3.6 Hz, 1H), 3.08–2.99 (m, 1H), 2.66–2.59 (m, 1H), 1.91 (s, 3H), 1.77 (d,  $J$  = 1.2 Hz, 3H), 1.76–1.62 (m, 1H), 1.66 (d,  $J$  = 1.2 Hz, 3H), 1.38–1.31 (m, 3H), 1.11–1.04 (m, 23H), 0.98 (d,  $J$  = 7.0 Hz, 3H), 0.95 (d,  $J$  = 6.8 Hz, 3H), 0.86 (d,  $J$  = 6.8 Hz, 3H), 0.84–0.80 (m, 6H);  $^{13}\text{C}$  NMR

(100 MHz, CDCl<sub>3</sub>)  $\delta$  195.3, 169.6, 156.0, 139.6, 134.7, 129.4, 82.0, 80.4, 41.0, 36.4, 36.3, 35.3, 32.0, 28.2, 20.9, 20.1, 18.6, 18.5, 18.4, 16.2, 16.0, 13.5, 12.2, 11.3, 9.3; HRMS [ESI] calcd for C<sub>31</sub>H<sub>58</sub>O<sub>4</sub>SiNa [M+Na]<sup>+</sup> 545.4002, found 545.3973.

### Alcohol **19**

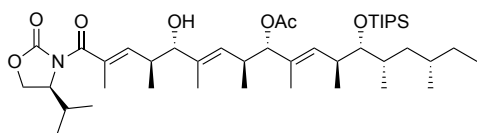

**19**

To a stirred solution of aldehyde **5** (77.2 mg, 0.144 mmol) in dry CH<sub>2</sub>Cl<sub>2</sub> (0.734 mL, 5.10 mL/mmol) were added 1.0 M solution of TiCl<sub>4</sub> in CH<sub>2</sub>Cl<sub>2</sub> (0.0720 mL, 0.0720 mmol, 0.50 equiv) and a solution of *N,O*-ketene acetal **7** (72.4 mg, 0.216 mmol, 1.50 equiv) in dry CH<sub>2</sub>Cl<sub>2</sub> (0.734 mL, 5.10 mL/mmol) dropwise at -78 °C under N<sub>2</sub>. After being stirred at -40 °C for 24 h, the reaction mixture was quenched with saturated aqueous NaHCO<sub>3</sub>, and then a saturated aqueous Rochelle salt was added. The organic layer was separated, and the aqueous layer was extracted with EtOAc (10 mL x 3). The combined organic layers were washed with brine, dried over Na<sub>2</sub>SO<sub>4</sub>, and filtered. The filtrate was concentrated in vacuo, and the residual oil was purified by column chromatography on silica gel (PSQ 100B 2.00 g, hexane/EtOAc = 15/1) to afford alcohol **19** (44.5 mg, 0.0595 mmol, 42%) as a colorless oil.

$R_f$  = 0.48 (hexane/EtOAc = 3/1);  $[\alpha]_D^{23}$  -5.87 (*c* 0.550, CHCl<sub>3</sub>); IR (CHCl<sub>3</sub>) 3517, 2965, 2929, 2869, 1774, 1727, 1686, 1371, 1249, 1018 cm<sup>-1</sup>; <sup>1</sup>H NMR (400 MHz, CDCl<sub>3</sub>)  $\delta$  5.74 (brd, *J* = 10.3 Hz, 1H), 5.63 (d, *J* = 9.1 Hz, 1H), 5.17 (d, *J* = 9.4 Hz, 1H), 5.01 (d, *J* = 9.1 Hz, 1H), 4.59–4.55 (m, 1H), 4.34 (t, *J* = 9.0 Hz, 1H), 4.19 (dd, *J* = 9.0, 5.7 Hz, 1H), 3.63–3.61 (m, 2H), 3.23 (brs, 1H), 2.80–2.66 (m, 2H), 2.66–2.59 (m, 1H), 2.39–2.31 (m, 1H), 1.97 (d, *J* = 1.2 Hz, 3H), 1.95 (s, 3H), 1.77–1.66 (m, 1H), 1.70 (s, 3H), 1.66 (s, 3H), 1.37–1.32 (m, 3H), 1.12–1.04 (m, 23H), 0.97 (d, *J* = 7.0 Hz, 3H), 0.93 (d, *J* = 7.0 Hz, 3H), 0.92 (d, *J* = 6.8 Hz, 3H), 0.87 (d, *J* = 6.8 Hz, 3H), 0.84–0.79 (m, 12H); <sup>13</sup>C NMR (100 MHz, CDCl<sub>3</sub>)  $\delta$  171.1, 170.2, 154.6, 141.9, 135.3, 134.2, 132.0, 131.8, 130.7, 83.0, 82.1, 80.4, 63.6, 58.2, 41.4, 38.1, 36.7, 35.3, 35.1, 32.1, 28.6, 28.5, 21.2, 20.2, 18.7, 18.6, 18.5, 18.0, 17.2, 16.3, 16.1, 15.3, 14.1, 13.7, 12.3, 11.4, 11.1; HRMS [ESI] calcd for C<sub>43</sub>H<sub>77</sub>NO<sub>7</sub>SiNa [M+Na]<sup>+</sup> 770.5367, found 770.5380.

### Allyl ester **20**

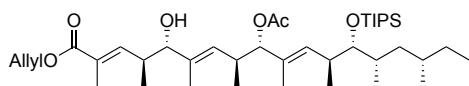

**20**

To a solution of allyl alcohol (0.0654 mL, 0.962 mmol, 12.0 equiv) in dry THF (1.47 mL, 18.3 mL/mmol) was added 1.0 M solution of EtMgBr in THF (0.241 mL, 0.241 mmol, 3.00 equiv) at 0 °C under N<sub>2</sub>. After the mixture was stirred at the same temperature for 15 min, a solution of alcohol **19** (60.0 mg, 0.0802 mmol) in dry THF (0.201 mL, 2.50 mL/mmol) was added to the reaction mixture at the same temperature. After being stirred at room temperature for 3 h, the reaction mixture was quenched with saturated aqueous NH<sub>4</sub>Cl at 0 °C. The organic layer was separated, and the aqueous layer was extracted with Et<sub>2</sub>O (10 mL x 3). The combined organic layers were washed with brine, dried over Na<sub>2</sub>SO<sub>4</sub>, and filtered. The filtrate was concentrated in vacuo, and the residual oil was

purified by column chromatography on silica gel (PSQ 100B 1.00 g, hexane/EtOAc = 18/1) to afford allyl ester **20** (48.0 mg, 0.0709 mmol, 89%) as a colorless oil.

$R_f$  = 0.58 (hexane/EtOAc = 3/1);  $[\alpha]_D^{23}$  -14.8 ( $c$  0.733, CHCl<sub>3</sub>); IR (CHCl<sub>3</sub>) 3592, 2964, 2945, 2869, 1724, 1709, 1648, 1211, 750 cm<sup>-1</sup>; <sup>1</sup>H NMR (400 MHz, CDCl<sub>3</sub>)  $\delta$  6.69 (brd,  $J$  = 9.9 Hz, 1H), 6.01–5.91 (m, 1H), 5.63 (d,  $J$  = 9.2 Hz, 1H), 5.33 (brd,  $J$  = 17.2 Hz, 1H), 5.23–5.20 (m, 2H), 4.99 (d,  $J$  = 9.6 Hz, 1H), 4.64 (brd,  $J$  = 5.6 Hz, 2H), 3.75 (d,  $J$  = 9.0 Hz, 1H), 3.62 (t,  $J$  = 3.6 Hz, 1H), 2.78–2.64 (m, 2H), 2.64–2.59 (m, 1H), 1.94 (s, 3H), 1.91 (s, 3H), 1.67 (s, 3H), 1.72–1.66 (m, 1H), 1.65 (s, 3H), 1.37–1.32 (m, 3H), 1.12–1.05 (m, 23H), 0.96 (d,  $J$  = 7.0 Hz, 3H), 0.94–0.89 (m, 1H), 0.87 (d,  $J$  = 6.8 Hz, 3H), 0.83–0.81 (m, 12H); <sup>13</sup>C NMR (100 MHz, CDCl<sub>3</sub>)  $\delta$  170.2, 167.8, 145.4, 136.0, 134.5, 132.7, 132.6, 130.0, 128.7, 118.0, 83.3, 82.5, 80.5, 65.4, 41.3, 37.2, 36.6, 35.2, 35.1, 32.1, 28.5, 21.3, 20.2, 18.64, 18.62, 18.5, 17.1, 16.5, 16.0, 13.7, 13.0, 12.2, 11.4, 11.2; HRMS [ESI] calcd for C<sub>40</sub>H<sub>72</sub>O<sub>6</sub>SiNa [M+Na]<sup>+</sup> 699.4996, found 699.5010.

#### Carboxylic acid **4**

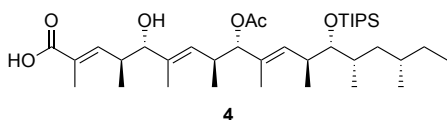

To a solution of allyl ester **20** (133 mg, 0.196 mmol) in dry THF (4.10 mL, 20.9 mL/mmol) were added Pd(PPh<sub>3</sub>)<sub>4</sub> (22.6 mg, 0.0196 mmol, 0.10 equiv) and morpholine (0.169 mL, 1.96 mmol, 10.0 equiv) at 0 °C under N<sub>2</sub>. After being stirred at room temperature for 12 h, the reaction mixture was quenched with brine at 0 °C. The organic layer was separated, and the aqueous layer was extracted with EtOAc (10 mL x 3). The combined organic layers were washed with aqueous 1 M HCl, saturated aqueous NaHCO<sub>3</sub>, and brine, successively; dried over Na<sub>2</sub>SO<sub>4</sub>; filtered; and then concentrated in vacuo. The residual oil was purified by column chromatography on silica gel (PSQ-100B 2.0 g, CHCl<sub>3</sub>/MeOH = 100/1) to afford carboxylic acid **4** (119 mg, 0.186 mmol, 95%) as a colorless oil.

$R_f$  = 0.40 (CHCl<sub>3</sub>/MeOH = 5/1);  $[\alpha]_D^{23}$  -8.15 ( $c$  0.733, CHCl<sub>3</sub>); IR (CHCl<sub>3</sub>) 3528, 2964, 2869, 1724, 1692, 1211, 785 cm<sup>-1</sup>; <sup>1</sup>H NMR (400 MHz, CDCl<sub>3</sub>)  $\delta$  6.79 (d,  $J$  = 9.8 Hz, 1H), 5.63 (d,  $J$  = 9.2 Hz, 1H), 5.21 (d,  $J$  = 9.5 Hz, 1H), 5.00 (d,  $J$  = 9.6 Hz, 1H), 3.77 (d,  $J$  = 9.0 Hz, 1H), 3.62 (t,  $J$  = 3.6 Hz, 1H), 2.78–2.62 (m, 2H), 2.61–2.59 (m, 1H), 1.95 (s, 3H), 1.89 (s, 3H), 1.67 (s, 3H), 1.66 (s, 3H), 1.74–1.66 (m, 1H), 1.39–1.32 (m, 3H), 1.12–1.05 (m, 21H), 1.01–0.89 (m, 2H), 0.96 (d,  $J$  = 7.0 Hz, 3H), 0.87 (d,  $J$  = 6.8 Hz, 3H), 0.84–0.81 (m, 12H), two protons (COOH and OH) were not observed; <sup>13</sup>C NMR (100 MHz, CDCl<sub>3</sub>)  $\delta$  172.9, 170.5, 147.5, 136.0, 134.7, 132.5, 130.3, 128.1, 83.4, 82.4, 80.5, 41.3, 37.3, 36.6, 35.2, 35.1, 32.1, 28.5, 21.3, 20.2, 18.64, 18.62, 18.5, 17.1, 16.4, 16.0, 13.7, 12.6, 12.2, 11.4, 11.2; HRMS [ESI] calcd for C<sub>37</sub>H<sub>68</sub>O<sub>6</sub>SiNa [M+Na]<sup>+</sup> 659.4683, found 659.4659.

#### Fmoc-L-Phe-OMEM (**S5**)

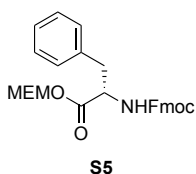

To a solution of Fmoc-L-Phe-OH (2.00 g, 5.17 mmol) in dry CH<sub>2</sub>Cl<sub>2</sub> (77.6 mL, 15.0 mL/mmol) were added DIEA (1.80 mL, 10.3 mmol, 2.0 equiv) and MEMCl (0.88 mL, 7.76 mmol, 1.50 equiv) at 0 °C under N<sub>2</sub>. After being

stirred at room temperature for 12 h, the reaction mixture was quenched with H<sub>2</sub>O at 0 °C. The organic layer was separated, and the aqueous layer was extracted with EtOAc (100 mL x 3). The combined organic layers were washed with aqueous 1 M HCl, saturated aqueous NaHCO<sub>3</sub>, and brine, successively; dried over Na<sub>2</sub>SO<sub>4</sub>; filtered; and then concentrated in vacuo. The residual oil was purified by column chromatography on silica gel (PSQ-100B 50.0 g, hexane/EtOAc = 7/1) to afford Fmoc-L-Phe-OMEM (**S5**) (2.45 g, 5.17 mmol, quant) as a colorless oil.

$R_f$  = 0.35 (hexane/EtOAc = 2/1);  $[\alpha]_D^{23}$  +11.7 (*c* 1.34, CHCl<sub>3</sub>); IR (CHCl<sub>3</sub>) 3432, 3028, 3013, 2931, 2896, 1720, 1509, 1450, 1247, 1110 cm<sup>-1</sup>; <sup>1</sup>H NMR (400 MHz, CDCl<sub>3</sub>)  $\delta$  7.77 (d, *J* = 7.5 Hz, 2H), 7.57 (brt, *J* = 6.0 Hz, 2H), 7.41 (brt, *J* = 7.5 Hz, 2H), 7.34–7.27 (m, 5H), 7.15 (d, *J* = 6.9 Hz, 2H), 5.40 (d, *J* = 6.0 Hz, 1H), 5.36 (d, *J* = 6.0 Hz, 1H), 5.33 (d, *J* = 8.0 Hz, 1H), 4.71 (dt, *J* = 8.0, 5.9 Hz, 1H), 4.45 (dd, *J* = 10.6, 7.0 Hz, 1H), 4.35 (dd, *J* = 10.6, 7.0 Hz, 1H), 4.21 (t, *J* = 7.0 Hz, 1H), 3.72 (t, *J* = 4.5 Hz, 2H), 3.52 (t, *J* = 4.5 Hz, 2H), 3.37 (s, 3H), 3.19 (dd, *J* = 13.9, 5.9 Hz, 1H), 3.13 (dd, *J* = 13.9, 5.9 Hz, 1H); <sup>13</sup>C NMR (100 MHz, CDCl<sub>3</sub>)  $\delta$  171.3, 155.8, 144.0, 143.9, 141.5, 135.8, 129.6, 128.8, 127.9, 127.4, 127.3, 125.3, 125.2, 120.2, 90.6, 71.6, 70.0, 67.2, 59.2, 55.0, 47.4, 38.2; HRMS [ESI] calcd for C<sub>28</sub>H<sub>29</sub>NO<sub>6</sub>Na [M+Na]<sup>+</sup> 498.1893, found 498.1909.

#### H-L-Phe-OMEM (**20**)

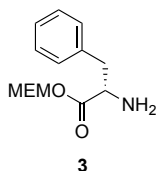

To a solution of Fmoc-L-Phe-OMEM (**S5**) (2.45 g, 5.17 mmol) in dry MeCN (51.7 mL, 10.0 mL/mmol) was added Et<sub>2</sub>NH (5.37 mL, 51.7 mmol, 10.0 equiv) at room temperature under N<sub>2</sub>. After being stirred at the same temperature for 1 h, the reaction mixture was diluted with toluene and then concentrated in vacuo. The resulting residue was used for the next reaction without further purification.

#### Amide **21**

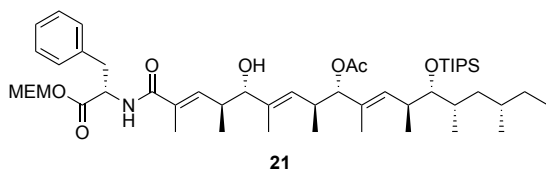

To a solution of carboxylic acid **4** (34.2 mg, 0.0536 mmol) in dry DMF (0.579 mL, 10.8 mL/mmol) were added HOAt (23.3 mg, 0.172 mmol, 3.20 equiv), DIEA (0.0338 mL, 0.194 mmol, 3.60 equiv), H-L-Phe-OMEM (**20**) (27.3 mg, 0.107 mmol, 2.00 equiv), and EDCI (25.1 mg, 0.161 mmol, 3.00 equiv) at 0 °C under N<sub>2</sub>. After being stirred at room temperature for 12 h, the reaction mixture was quenched with brine at 0 °C. The organic layer was separated, and the aqueous layer was extracted with EtOAc (10 mL x 3). The combined organic layers were washed with brine, dried over Na<sub>2</sub>SO<sub>4</sub>, filtered, and then concentrated in vacuo. The residual oil was purified by column chromatography on silica gel (PSQ-100B 600 mg, hexane/EtOAc = 4/1) to afford amide **21** (46.7 mg, 0.0536 mmol, quant) as a colorless oil.

$R_f$  = 0.45 (hexane/EtOAc = 1/1);  $[\alpha]_D^{23}$  +1.03 (*c* 1.05, CHCl<sub>3</sub>); IR (CHCl<sub>3</sub>) 3441, 2964, 2930, 2869, 1728, 1669, 1632, 1506, 1248, 1105 cm<sup>-1</sup>; <sup>1</sup>H NMR (400 MHz, CDCl<sub>3</sub>)  $\delta$  7.30–7.22 (m, 3H), 7.17–7.15 (m, 2H), 6.31 (d, *J* =

7.5 Hz, 1H), 6.17 (d,  $J = 9.6$  Hz, 1H), 5.63 (d,  $J = 7.9$  Hz, 1H), 5.38 (d,  $J = 6.0$  Hz, 1H), 5.34 (d,  $J = 6.0$  Hz, 1H), 5.19 (d,  $J = 7.5$  Hz, 1H), 5.00 (d,  $J = 9.6$  Hz, 1H), 4.90 (dt,  $J = 7.5, 6.1$  Hz, 1H), 3.72–3.67 (m, 3H), 3.62 (brt,  $J = 3.7$  Hz, 1H), 3.53–3.51 (m, 2H), 3.37 (s, 3H), 3.21 (dd,  $J = 13.8, 6.1$  Hz, 1H), 3.15 (dd,  $J = 13.8, 6.1$  Hz, 1H), 2.77–2.70 (m, 1H), 2.70–2.56 (m, 2H), 1.93 (s, 3H), 1.85 (d,  $J = 1.0$  Hz, 3H), 1.73–1.62 (m, 7H), 1.37–1.32 (m, 3H), 1.10–1.04 (m, 23H), 0.96 (d,  $J = 7.0$  Hz, 3H), 0.87 (d,  $J = 6.8$  Hz, 3H), 0.84–0.79 (m, 12H), one proton (OH?) was not observed;  $^{13}\text{C}$  NMR (100 MHz,  $\text{CDCl}_3$ )  $\delta$  171.6, 170.3, 168.9, 139.8, 136.1, 136.0, 134.7, 132.2, 131.5, 130.3, 129.5, 128.7, 127.3, 90.5, 83.4, 82.3, 80.4, 71.5, 69.9, 59.2, 53.5, 41.3, 37.8, 36.9, 36.6, 35.2, 35.1, 32.0, 28.5, 21.2, 20.2, 18.62, 18.60, 18.5, 17.1, 16.8, 16.0, 13.7, 13.1, 12.1, 11.4, 11.3; HRMS [ESI] calcd for  $\text{C}_{50}\text{H}_{85}\text{NO}_9\text{SiNa}$   $[\text{M}+\text{Na}]^+$  894.5891, found 894.5890.

#### Alloc carbonate **22**

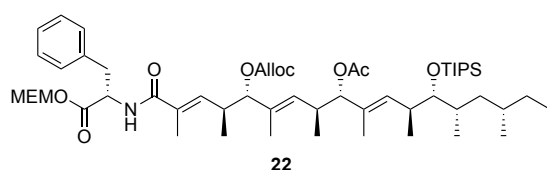

To a solution of amide **38** (52.7 mg, 0.0605 mmol) in dry THF (1.09 mL, 18.0 mL/mmol) were added pyridine (0.0487 mL, 0.605 mmol, 10.0 equiv) and AllocCl (0.0320 mL, 0.0303 mmol, 5.00 equiv) at 0 °C under  $\text{N}_2$ . After being stirred at room temperature for 5 h, the reaction mixture was quenched with saturated aqueous  $\text{NaHCO}_3$  at 0 °C. The organic layer was separated, and the aqueous layer was extracted with  $\text{Et}_2\text{O}$  (10 mL x 3). The combined organic layers were washed with aqueous 1 M HCl, saturated aqueous  $\text{NaHCO}_3$ , and brine, successively; dried over  $\text{Na}_2\text{SO}_4$ ; filtered; and then concentrated in vacuo. The residual oil was purified by column chromatography on silica gel (PSQ-100B 1.0 g, hexane/ $\text{EtOAc} = 5/1$ ) to afford **22** (51.9 mg, 0.0543 mmol, 89%) as a colorless oil.

$R_f = 0.63$  (hexane/ $\text{EtOAc} = 1/1$ );  $[\alpha]_D^{23} -4.03$  ( $c$  0.525,  $\text{CHCl}_3$ ); IR ( $\text{CHCl}_3$ ) 3441, 3029, 2963, 2869, 1735, 1667, 1636, 1506, 1370, 1258  $\text{cm}^{-1}$ ;  $^1\text{H}$  NMR (400 MHz,  $\text{CDCl}_3$ )  $\delta$  7.32–7.22 (m, 3H), 7.20–7.17 (m, 2H), 6.33 (d,  $J = 7.3$  Hz, 1H), 5.92–5.83 (m, 1H), 5.90 (d,  $J = 10.3$  Hz, 1H), 5.64 (d,  $J = 9.2$  Hz, 1H), 5.39 (d,  $J = 6.1$  Hz, 1H), 5.33 (d,  $J = 6.1$  Hz, 1H), 5.31–5.27 (m, 2H), 5.21 (brd,  $J = 10.4$  Hz, 1H), 5.00 (d,  $J = 9.7$  Hz, 1H), 4.83 (dt,  $J = 7.3, 6.4$  Hz, 1H), 4.73 (d,  $J = 9.1$  Hz, 1H), 4.59–4.51 (m, 2H), 3.72–3.69 (m, 2H), 3.62 (t,  $J = 3.6$  Hz, 1H), 3.53–3.51 (m, 2H), 3.37 (s, 3H), 3.22 (dd,  $J = 13.7, 6.4$  Hz, 1H), 3.11 (dd,  $J = 13.7, 6.4$  Hz, 1H), 2.84–2.70 (m, 2H), 2.63–2.58 (m, 1H), 1.89 (s, 3H), 1.81 (d,  $J = 1.0$  Hz, 3H), 1.74–1.71 (m, 1H), 1.68 (d,  $J = 0.8$  Hz, 3H), 1.63 (s, 3H), 1.37–1.32 (m, 3H), 1.10–1.05 (m, 21H), 0.96 (d,  $J = 7.0$  Hz, 3H), 0.94–0.88 (m, 2H), 0.87–0.81 (m, 15H);  $^{13}\text{C}$  NMR (100 MHz,  $\text{CDCl}_3$ )  $\delta$  171.5, 169.8, 169.6, 154.6, 137.4, 136.2, 134.8, 134.6, 132.2, 131.9, 131.8, 130.2, 129.5, 128.7, 127.2, 118.9, 90.4, 86.9, 82.8, 80.5, 71.5, 69.8, 68.5, 59.2, 53.6, 41.2, 37.8, 36.6, 35.6, 35.3, 35.2, 32.1, 28.4, 21.0, 20.2, 18.63, 18.60, 18.55, 17.0, 16.5, 16.0, 13.7, 13.1, 12.1, 12.0, 11.4; HRMS [ESI] calcd for  $\text{C}_{54}\text{H}_{89}\text{NO}_{11}\text{SiNa}$   $[\text{M}+\text{Na}]^+$  978.6103, found 978.6079.

#### Cyclization precursor **2**

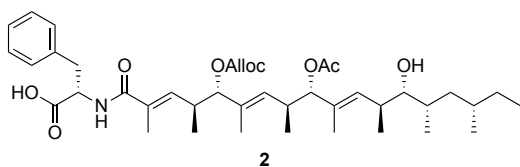

To a solution of **22** (80.0 mg, 0.0837 mmol) in dry dioxane (7.97 mL, 95.2 mL/mmol) was added 4.0 M solution of HCl in dioxane (7.97 mL, 95.2 mL/mmol) at 0 °C under N<sub>2</sub>. After being stirred at room temperature for 15 min, the reaction mixture was diluted with toluene and then concentrated in vacuo. The resulting residue was used for the next reaction without further purification.

To a solution of the above residue in MeCN (14.0 mL, 167 mL/mmol) was added aqueous HF (5.98 mL, 71.4 mL/mmol, 47% w/w) at 0 °C under N<sub>2</sub>. After being stirred at room temperature for 15 min, the reaction mixture was quenched with saturated aqueous NaHCO<sub>3</sub> at 0 °C and acidified with aqueous 2 M NaH<sub>2</sub>PO<sub>4</sub>. The organic layer was separated, and the aqueous layer was extracted with EtOAc (30 mL x 3). The combined organic layers were washed with brine, dried over Na<sub>2</sub>SO<sub>4</sub>, filtered, and then concentrated. The residual oil was purified by column chromatography on silica gel (PSQ-100B 800 mg, CHCl<sub>3</sub>/MeOH = 100/1) to afford cyclization precursor **2** (44.0 mg, 0.0618 mmol, 74% in 2 steps) as a colorless oil.

$R_f$  = 0.40 (CHCl<sub>3</sub>/MeOH = 5/1);  $[\alpha]_D^{23}$  +3.67 ( $c$  0.917, CHCl<sub>3</sub>); IR (CHCl<sub>3</sub>) 3666, 3517, 3438, 2964, 2929, 2873, 1731, 1665, 1632, 1509, 1372, 1261 cm<sup>-1</sup>; <sup>1</sup>H NMR (400 MHz, CDCl<sub>3</sub>)  $\delta$  7.36–7.33 (m, 2H), 7.28–7.25 (m, 3H), 6.30 (brd,  $J$  = 6.5 Hz, 1H), 5.94–5.84 (m, 2H), 5.37–5.24 (m, 4H), 4.84 (d,  $J$  = 9.0 Hz, 1H), 4.75–4.69 (m, 2H), 4.55 (brd,  $J$  = 5.6 Hz, 2H), 3.33 (dd,  $J$  = 14.3, 5.2 Hz, 1H), 3.23 (dd,  $J$  = 8.5, 2.8 Hz, 1H), 3.15 (dd,  $J$  = 14.3, 8.0 Hz, 1H), 2.84–2.73 (m, 2H), 2.62–2.55 (m, 1H), 1.93 (s, 3H), 1.80 (s, 3H), 1.78–1.72 (m, 1H), 1.69 (s, 3H), 1.62 (s, 3H), 1.46–1.35 (m, 3H), 1.12–1.02 (m, 3H), 0.90–0.84 (m, 17H), two protons (COOH and OH) were not observed; <sup>13</sup>C NMR (100 MHz, CDCl<sub>3</sub>)  $\delta$  178.3, 171.0, 170.7, 154.7, 138.3, 136.3, 134.4, 133.6, 133.3, 132.0, 131.8, 130.1, 129.6, 128.9, 127.3, 119.0, 86.6, 84.0, 70.8, 68.5, 54.3, 41.6, 36.1, 35.6, 34.4, 31.5, 31.4, 29.9, 29.4, 21.2, 19.6, 17.0, 16.9, 16.5, 13.3, 13.0, 12.4, 12.0, 11.4; HRMS [ESI] calcd for C<sub>41</sub>H<sub>61</sub>NO<sub>9</sub>Na [M+Na]<sup>+</sup> 734.4244, found 734.4233.

### Macrolactone **23**

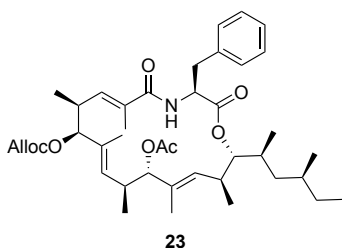

To a solution of cyclization precursor **2** (8.5mg, 0.0123 mmol) in dry 1,2-dichloroethane (0.114 mL, 9.30 mL/mmol) was added *N*-methyl-*N*-toluenesulfonamide<sup>xx</sup>) (MYTsA) (2.8 mg, 0.0135 mmol, 1.10 equiv) at room temperature under N<sub>2</sub>. After being stirred at the same temperature for 20 h, the reaction mixture was concentrated in vacuo. The resulting residue was used for the next reaction without further purification.

To a solution of the above residue in dry 1,2-dichloroethane (2.46 mL, 200 mL/mmol) was added TsOH•H<sub>2</sub>O (0.4 mg, 0.00185 mmol, 15 mol%) at room temperature under N<sub>2</sub>. After being stirred at the same temperature for



1.5 h, the reaction mixture was quenched with saturated aqueous NaHCO<sub>3</sub> at 0 °C. The organic layer was separated, and the aqueous layer was extracted with EtOAc (10 mL x 3). The combined organic layers were washed with brine, dried over Na<sub>2</sub>SO<sub>4</sub>, filtered, and then concentrated in vacuo. The residual oil was purified by column chromatography on silica gel (PSQ-100B 100 mg, hexane/EtOAc = 5/1) to afford macrolactone **23** (5.40 mg, 0.00779 mmol, 65% in 2 steps) as a colorless oil.

$R_f$  = 0.72 (hexane/EtOAc = 1/1);  $[\alpha]_D^{23}$  +1.52 (*c* 0.592, CHCl<sub>3</sub>); IR (CHCl<sub>3</sub>) 3442, 3028, 2967, 2931, 1732, 1669, 1636, 1506, 1254, 967 cm<sup>-1</sup>; <sup>1</sup>H NMR (400 MHz, CDCl<sub>3</sub>) δ 7.29–7.27 (m, 2H), 7.20–7.18 (m, 3H), 5.97–5.88 (m, 3H), 5.34 (d, *J* = 17.2 Hz, 1H), 5.28 (d, *J* = 10.5 Hz, 1H), 5.11 (d, *J* = 5.1 Hz, 1H), 5.00–4.85 (m, 4H), 4.69–4.55 (m, 3H), 3.28 (dd, *J* = 14.0, 5.8 Hz, 1H), 3.20 (dd, *J* = 14.0, 6.0 Hz, 1H), 2.98–2.92 (m, 1H), 2.82–2.77 (m, 1H), 2.73–2.69 (m, 1H), 2.03 (s, 3H), 1.83 (s, 3H), 1.65 (s, 3H), 1.58 (s, 3H), 1.44–1.34 (m, 1H), 1.31–1.24 (m, 1H), 1.14 (d, *J* = 6.8 Hz, 3H), 1.11–1.08 (m, 1H), 0.92–0.80 (m, 3H), 0.86 (d, *J* = 7.0 Hz, 3H), 0.82 (d, *J* = 6.6 Hz, 3H), 0.78–0.72 (m, 6H), 0.67 (d, *J* = 6.9 Hz, 3H); <sup>13</sup>C NMR (100 MHz, CDCl<sub>3</sub>) δ 170.8, 169.8, 168.5, 154.8, 136.9, 133.7, 133.0, 132.0, 131.8, 131.1, 130.8, 129.8, 128.7, 127.0, 125.2, 118.5, 83.2, 82.9, 81.1, 68.3, 53.0, 40.1, 36.5, 36.4, 34.5, 33.7, 33.6, 31.3, 27.6, 21.3, 20.4, 18.9, 18.2, 16.0, 15.8, 14.9, 13.5, 13.1, 10.8; HRMS [ESI] calcd for C<sub>41</sub>H<sub>59</sub>NO<sub>8</sub>Na [M+Na]<sup>+</sup> 716.4138, found 716.4151.

#### Azlactone **24**

The azlactone **24** was provided as an undesired product in the macrolactonization promoted by MNBA/DMAPO or TCBC/Et<sub>3</sub>N/DMAP.

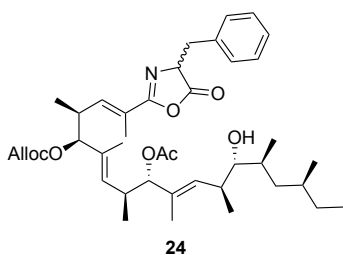

$R_f$  = 0.74 (hexane/EtOAc = 1/1); IR (CHCl<sub>3</sub>) 3533, 2963, 2930, 2874, 1813, 1737, 1656, 1621, 1455, 1370, 1260, 982, 909 cm<sup>-1</sup>; <sup>1</sup>H NMR (400 MHz, CDCl<sub>3</sub>, mixture of diastereomers) δ 7.28–7.20 (m, 5H), 6.29 (d, *J* = 9.3 Hz, 0.5H), 6.26 (d, *J* = 9.3 Hz, 0.5H), 5.94–5.82 (m, 1H), 5.37–5.19 (m, 4H), 4.85 (d, *J* = 7.1 Hz, 0.5H), 4.82 (d, *J* = 7.0 Hz, 0.5H), 4.76 (d, *J* = 8.6 Hz, 1H), 4.56–4.52 (m, 3H), 3.29–3.24 (m, 1H), 3.20–3.18 (m, 1H), 3.14–3.09 (m, 1H), 2.95–2.88 (m, 1H), 2.79–2.71 (m, 1H), 2.61–2.56 (m, 1H), 1.96–1.94 (m, 3H), 1.94 (s, 1.5H), 1.92 (s, 1.5H), 1.79–1.65 (m, 1H), 1.67 (d, *J* = 1.1 Hz, 1.5H), 1.64 (d, *J* = 1.1 Hz, 1.5H), 1.62 (d, *J* = 1.0 Hz, 1.5H), 1.61 (d, *J* = 1.1 Hz, 1.5H), 1.49–1.40 (m, 3H), 1.11–1.03 (m, 3H), 0.92–0.81 (m, 17H); <sup>13</sup>C NMR (100 MHz, CDCl<sub>3</sub>, mixture of diastereomers) δ 177.5, 170.4, 165.5, 162.9, 154.03, 153.97, 142.5, 142.4, 135.4, 134.19, 134.15, 134.0, 133.9, 133.4, 131.8, 131.7, 129.6, 129.5, 128.3, 127.1, 124.1, 118.71, 118.67, 86.34, 86.30, 83.7, 83.6, 68.3, 66.59, 66.56, 51.5, 41.6, 37.3, 36.1, 34.2, 31.4, 31.2, 29.7, 29.4, 21.0, 19.5, 16.80, 16.78, 16.68, 16.66, 16.3, 16.2, 13.1, 12.2, 12.1, 12.0, 11.90, 11.87, 11.2; HRMS [ESI] calcd for C<sub>41</sub>H<sub>59</sub>NO<sub>8</sub>Na [M+Na]<sup>+</sup> 716.4138, found 716.4138.

#### Metacridamide A (Revised structure) (**1a'**)

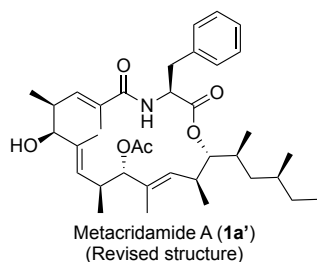

To a solution of macrolactone **23** (1.71 mg, 2.47 mmol) in dry THF (0.0419 mL, 17.0 mL/mmol) were added Pd(PPh<sub>3</sub>)<sub>4</sub> (0.285 mg, 0.247 mmol, 0.100 equiv) and *N*-methylaniline (2.67 mL, 24.7 mmol, 10.0 equiv) at 0 °C under N<sub>2</sub>. After being stirred at room temperature for 1 h, the reaction mixture was quenched with saturated aqueous NH<sub>4</sub>Cl at 0 °C. The organic layer was separated, and the aqueous layer was extracted with EtOAc (10 mL x 3). The combined organic layers were washed with brine, dried over Na<sub>2</sub>SO<sub>4</sub>, filtered, and then concentrated in vacuo. The residual oil was purified by column chromatography on silica gel (PSQ-100B 100 mg, hexane/EtOAc = 5/1) to afford metacridamide A (**1a'**) (1.50 mg, 2.46 mmol, quant) as a colorless oil.

$R_f = 0.50$  (hexane/EtOAc = 2/1);  $[\alpha]_D^{23} -8.71$  (*c* 0.283, CHCl<sub>3</sub>); IR (CHCl<sub>3</sub>) 3470, 3019, 2965, 2929, 1728, 1668, 1635, 1558, 1249, 1218, 1211, 1014 cm<sup>-1</sup>; <sup>1</sup>H NMR (600 MHz, CDCl<sub>3</sub>) δ 7.27–7.19 (m, 5H), 6.03 (dd, *J* = 9.5, 1.4 Hz, 1H), 5.92 (d, *J* = 8.6 Hz, 1H), 5.11 (d, *J* = 9.7 Hz, 1H), 5.02 (brd, *J* = 6.8 Hz, 1H), 4.95–4.92 (m, 1H), 4.92 (d, *J* = 3.7 Hz, 1H), 4.61 (dd, *J* = 8.8, 2.3 Hz, 1H), 3.96 (brs, 1H), 3.27 (dd, *J* = 14.0, 6.1 Hz, 1H), 3.20 (dd, *J* = 14.0, 5.8 Hz, 1H), 2.85–2.81 (m, 2H), 2.73–2.70 (m, 1H), 2.04 (s, 3H), 1.82 (d, *J* = 1.4 Hz, 3H), 1.63 (d, *J* = 1.2 Hz, 3H), 1.61 (s, 3H), 1.63–1.60 (m, 1H), 1.42–1.38 (m, 1H), 1.30–1.25 (m, 1H), 1.20 (d, *J* = 7.0 Hz, 3H), 1.14–1.08 (m, 1H), 0.92 (d, *J* = 7.0 Hz, 3H), 0.88–0.83 (m, 2H), 0.81 (d, *J* = 6.6 Hz, 3H), 0.75 (d, *J* = 6.6 Hz, 3H), 0.74 (t, *J* = 7.4 Hz, 3H), 0.66 (d, *J* = 6.9 Hz, 3H), one proton (OH) was not observed; <sup>13</sup>C NMR (150 MHz, CDCl<sub>3</sub>) δ 170.9, 169.8, 168.7, 137.1, 137.0, 133.7, 132.7, 131.0, 130.9, 129.8, 128.7, 127.0, 124.2, 82.7, 81.4, 78.3, 53.0, 40.1, 36.6, 36.4, 35.4, 33.7, 33.5, 31.3, 27.6, 21.4, 20.5, 19.4, 18.2, 16.1, 16.0, 15.0, 13.5, 13.1, 10.8; HRMS [ESI] calcd for C<sub>37</sub>H<sub>55</sub>NO<sub>6</sub>Na [M+Na]<sup>+</sup> 632.3927, found 632.3908.

#### Metacridamide B (Revised structure) (**1b'**)

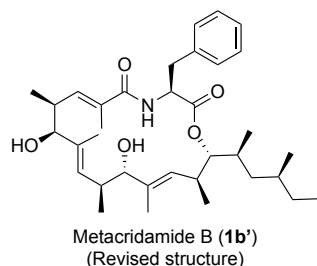

To a solution of metacridamide A (**1a'**) (3.00 mg, 4.92 mmol) in dry THF (1.51 mL, 306 mL/mmol) was added 4.0 M aqueous solution of LiOH·H<sub>2</sub>O (1.51 mL, 306 mL/mmol) at room temperature under N<sub>2</sub>. After being stirred at 60 °C for 24 h, the reaction mixture was quenched with saturated aqueous NH<sub>4</sub>Cl at 0 °C. The organic layer was separated, and the aqueous layer was extracted with EtOAc (10 mL x 3). The combined organic layers were washed with brine, dried over Na<sub>2</sub>SO<sub>4</sub>, filtered, and then concentrated in vacuo. The residual oil was purified by column chromatography on silica gel (PSQ-100B 100 mg, hexane/EtOAc = 4/1) to afford metacridamide B (**1b'**) (2.0 mg, 3.5 mmol, 72%) as a colorless oil.

$R_f = 0.38$  (hexane/EtOAc = 2/1);  $[\alpha]_D^{23} +24.3$  ( $c$  0.150,  $\text{CHCl}_3$ ); IR ( $\text{CHCl}_3$ ) 3420, 3023, 2961, 2928, 2360, 1725, 1667, 1559, 1507, 1456, 1011  $\text{cm}^{-1}$ ;  $^1\text{H}$  NMR (600 MHz,  $\text{CD}_3\text{OD}$ )  $\delta$  7.25–7.22 (m, 4H), 7.18–7.15 (m, 1H), 6.14 (d,  $J = 9.6$  Hz, 1H), 5.25 (d,  $J = 10.4$  Hz, 1H), 5.11 (d,  $J = 10.0$  Hz, 1H), 4.85 (brs, 1H), 4.69 (dd,  $J = 8.0, 1.8$  Hz, 1H), 3.93 (s, 1H), 3.83 (d,  $J = 3.6$  Hz, 1H), 3.33 (m, 1H), 2.94 (dd,  $J = 14.2, 10.1$  Hz, 1H), 2.82–2.78 (m, 2H), 2.73–2.70 (m, 1H), 1.70–1.67 (m, 1H), 1.66 (d,  $J = 1.2$  Hz, 3H), 1.64 (d,  $J = 1.4$  Hz, 3H), 1.59 (s, 3H), 1.42–1.34 (m, 2H), 1.31–1.26 (m, 1H), 1.17 (d,  $J = 7.0$  Hz, 3H), 1.00 (d,  $J = 7.0$  Hz, 3H), 0.98–0.94 (m, 1H), 0.93 (d,  $J = 7.0$  Hz, 3H), 0.91–0.88 (m, 1H), 0.86 (d,  $J = 6.6$  Hz, 3H), 0.83 (t,  $J = 7.4$  Hz, 3H), 0.76 (d,  $J = 6.7$  Hz, 3H);  $^{13}\text{C}$  NMR (150 MHz,  $\text{CD}_3\text{OD}$ )  $\delta$  172.9, 172.4, 139.4, 136.8, 136.2, 135.9, 132.4, 130.22, 130.19, 129.3, 127.5, 127.3, 83.5, 80.8, 79.2, 54.2, 42.1, 40.5, 37.1, 36.6, 35.4, 35.1, 32.8, 29.3, 20.6, 19.6, 19.2, 16.1, 15.9, 15.0, 13.6, 13.4, 11.6; HRMS [ESI] calcd for  $\text{C}_{35}\text{H}_{53}\text{NO}_5\text{Na}$   $[\text{M}+\text{Na}]^+$  590.3821, found 590.3811.

### Evaluation of cytotoxicity

Stock cultures of cancer cells (MCF-7 : ATCC HTB-22, HCT-116 : ATCC CCL-247) were maintained in Dulbecco's Modified Eagle Medium (nacalai tesque) containing 10% fetal bovine serum (gibco), 1% antibiotic (penicillin-streptomycin mixed solution, nacalai tesque) at 37 °C under 5%  $\text{CO}_2$ . For the purpose of the experiment,  $2 \times 10^3$  cells suspended in 100  $\mu\text{L}$  of medium per well were plated in 96-well plate and incubated at 37 °C under 5%  $\text{CO}_2$ . After incubation for 24 h, a solution of compound in DMSO (1  $\mu\text{L}$ , concentration: 0.001, 0.01, 0.1, 1, 10  $\mu\text{M}$ , respectively) was added to the above-mentioned well, resulting in various concentrations of the compound (0.01, 0.1, 1, 10, 100  $\mu\text{M}$ ) or solvent control (1% DMSO). After incubation for 72 h under the same conditions, 1.4 mg/mL MTT solution in phosphate buffer saline (100  $\mu\text{L}$ ) was added to the cell culture. After 4 h, the culture medium was removed, and the precipitated formazan product was dissolved in DMSO (150  $\mu\text{L}$ ). Optical density at 570 nm was measured with a TECAN microplate reader (Infinite 200 Pro). All assays were performed in triplicate to confirm reproducibility.

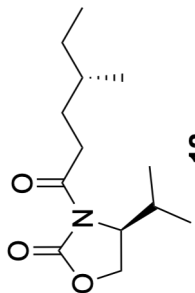

12

<sup>1</sup>H NMR  
(400 MHz, CDCl<sub>3</sub>)

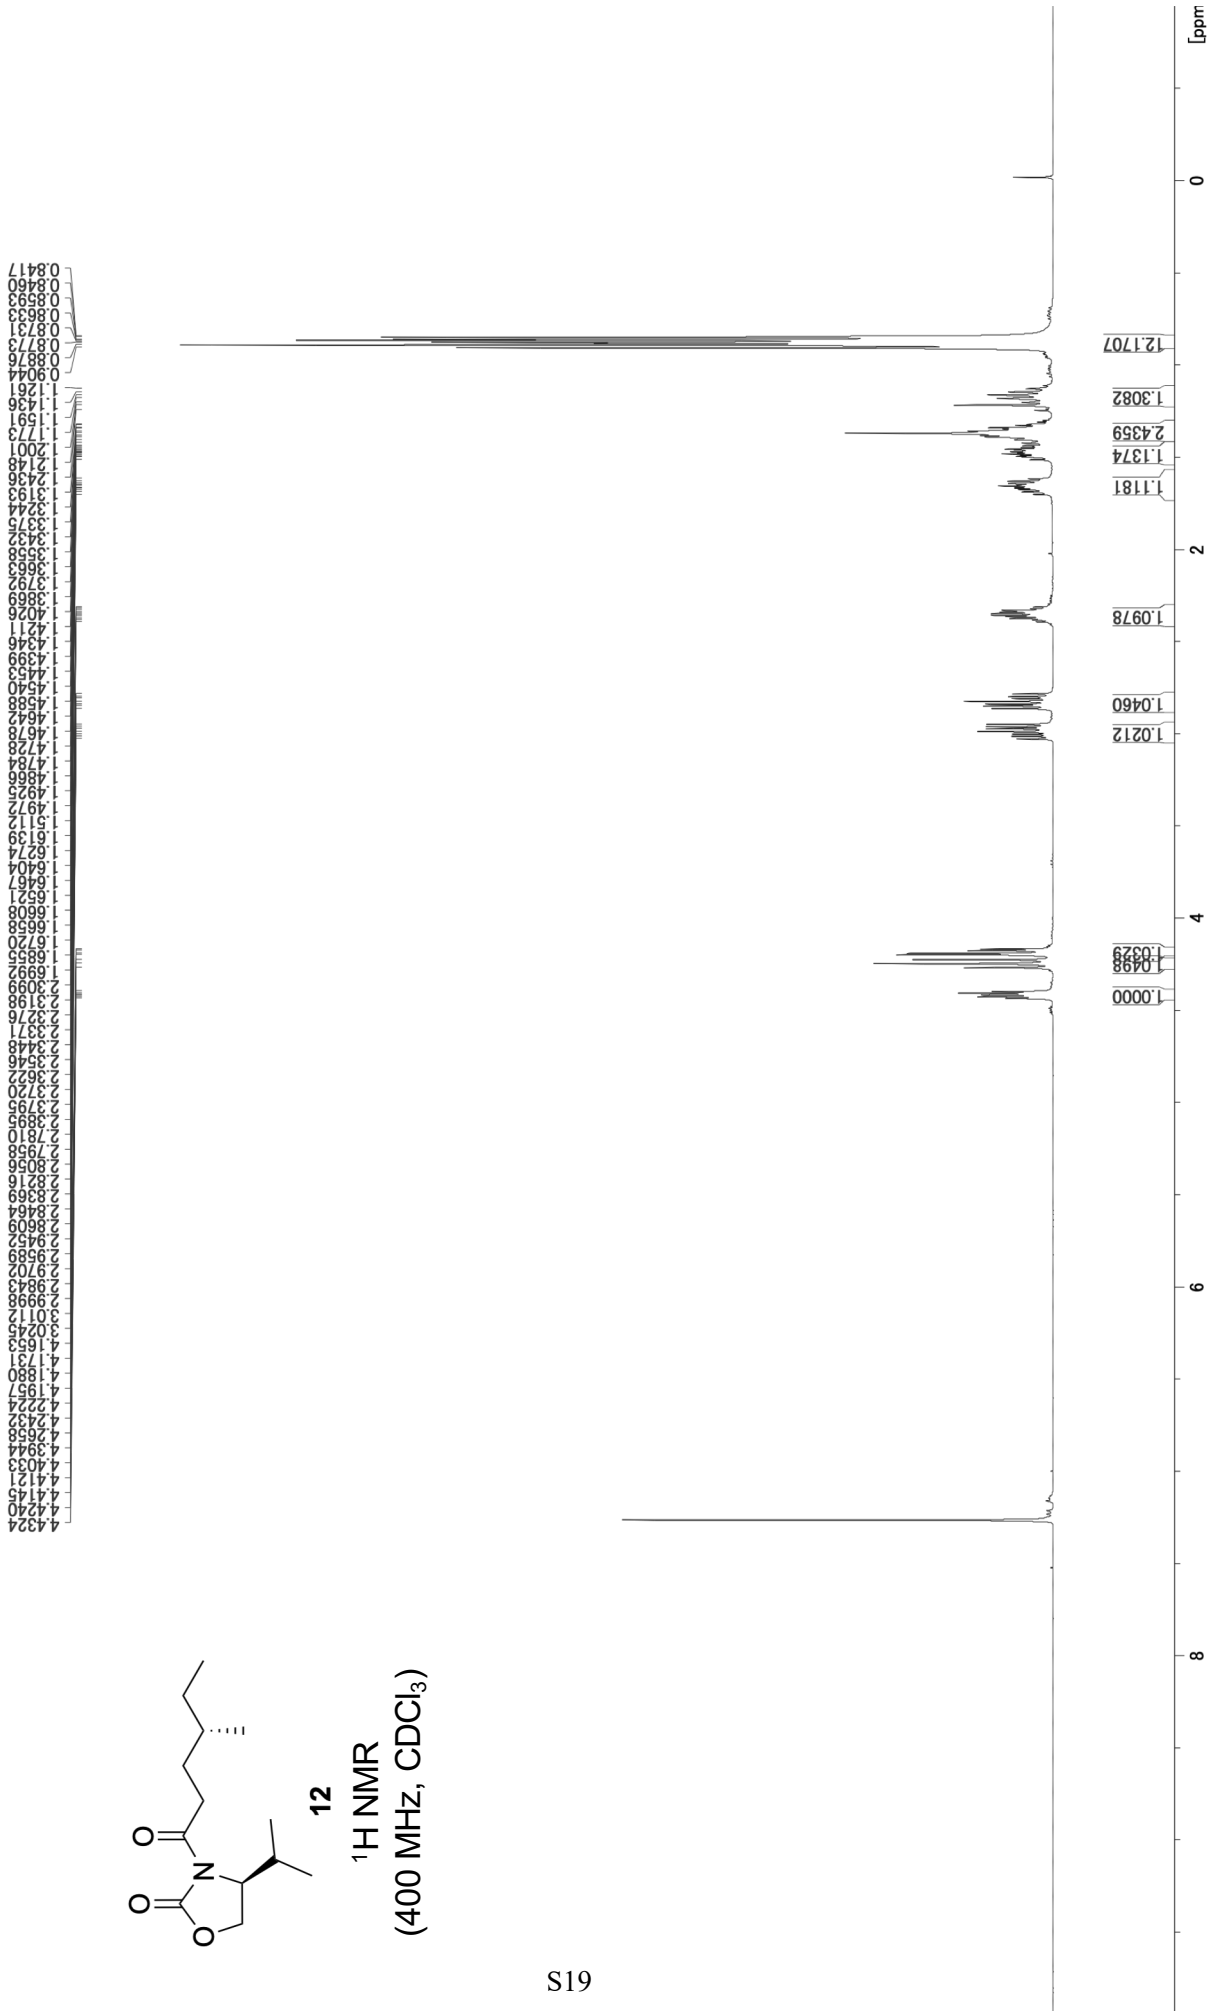

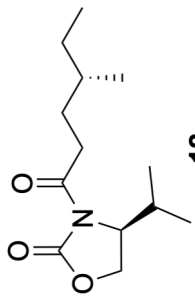

<sup>13</sup>C NMR  
(100 MHz, CDCl<sub>3</sub>)

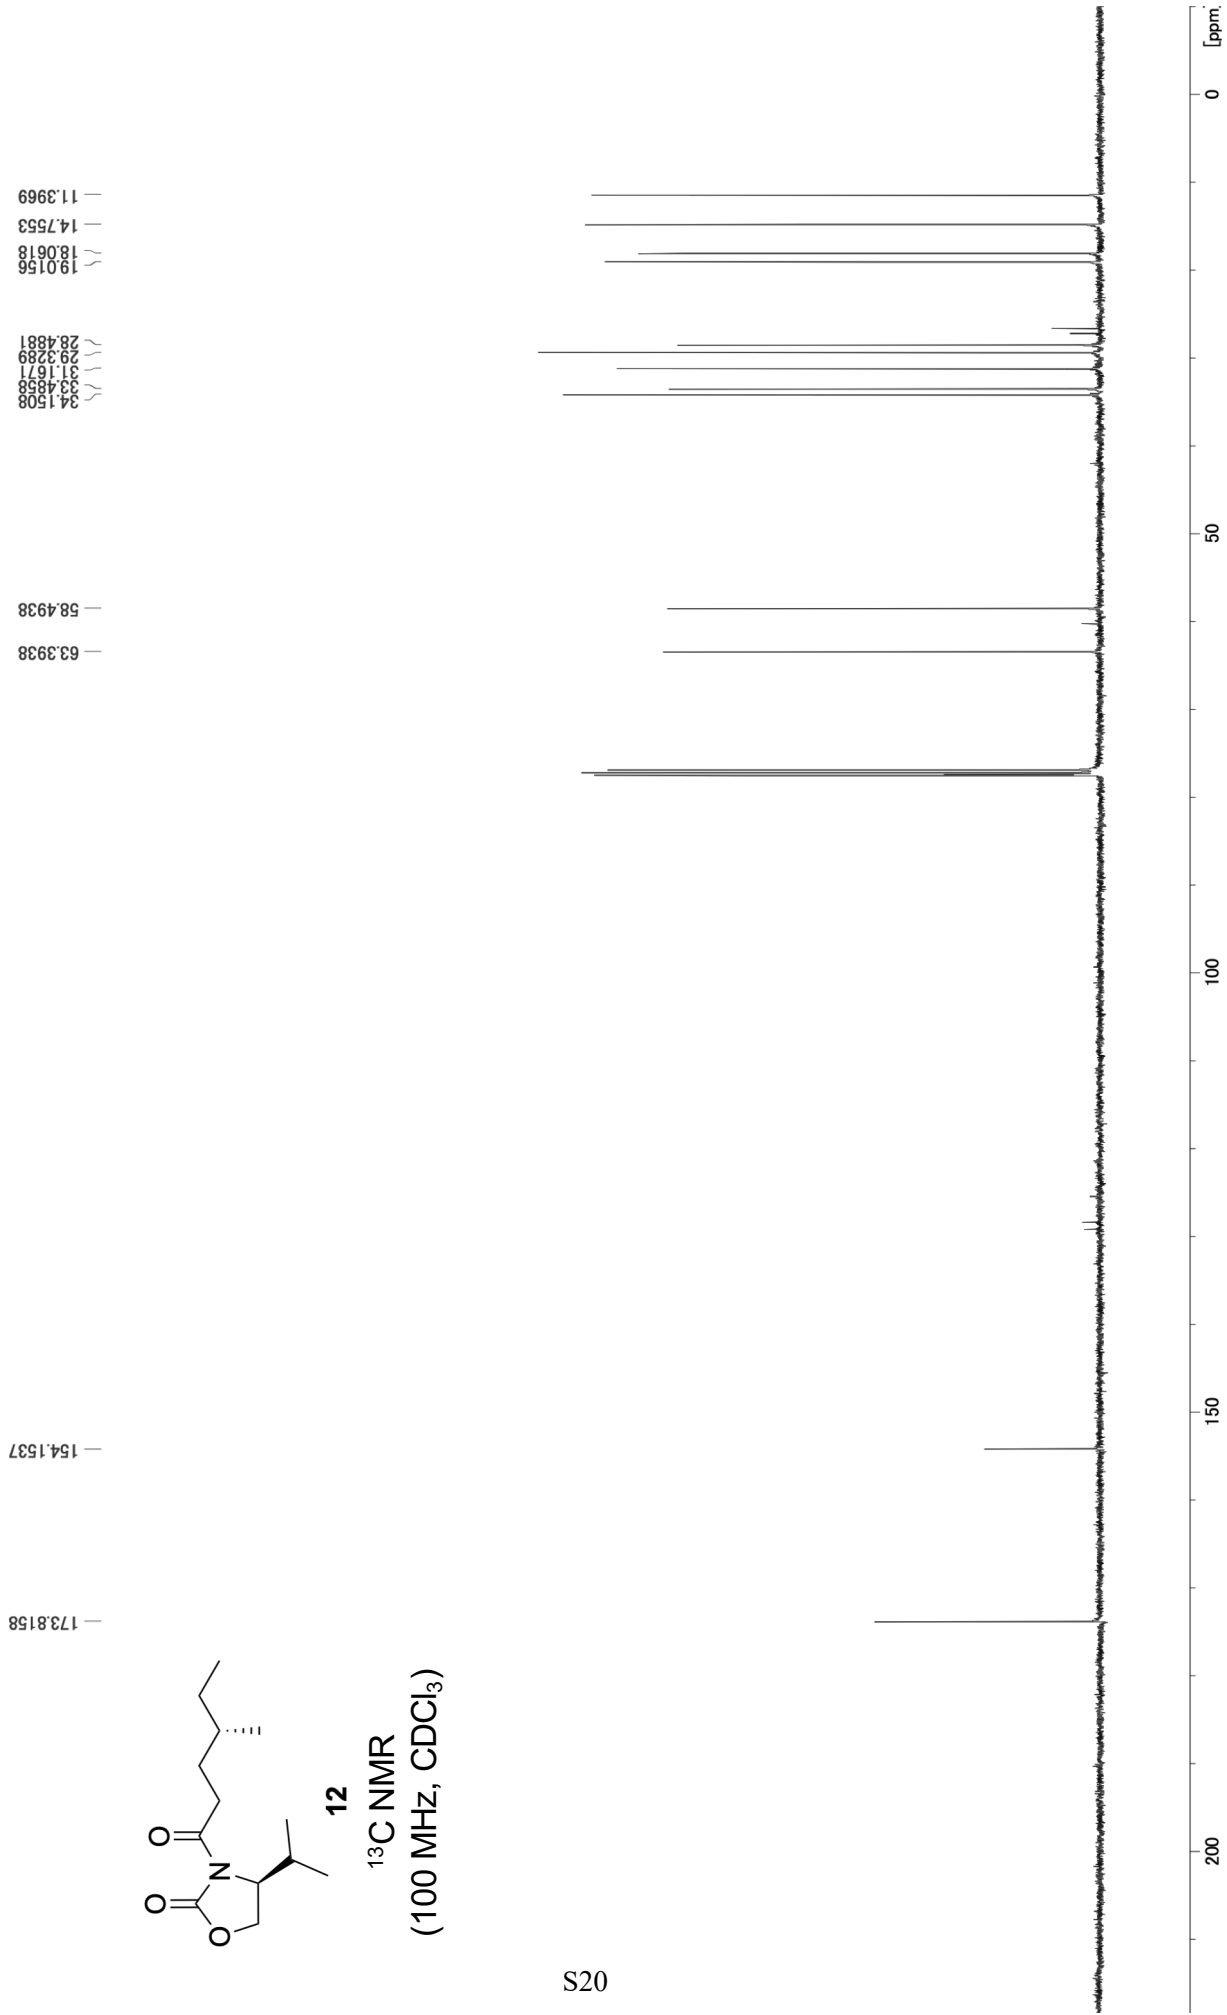

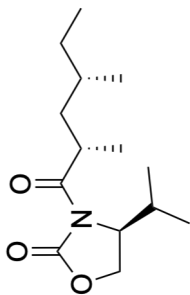

**13**

<sup>1</sup>H NMR  
(400 MHz, CDCl<sub>3</sub>)

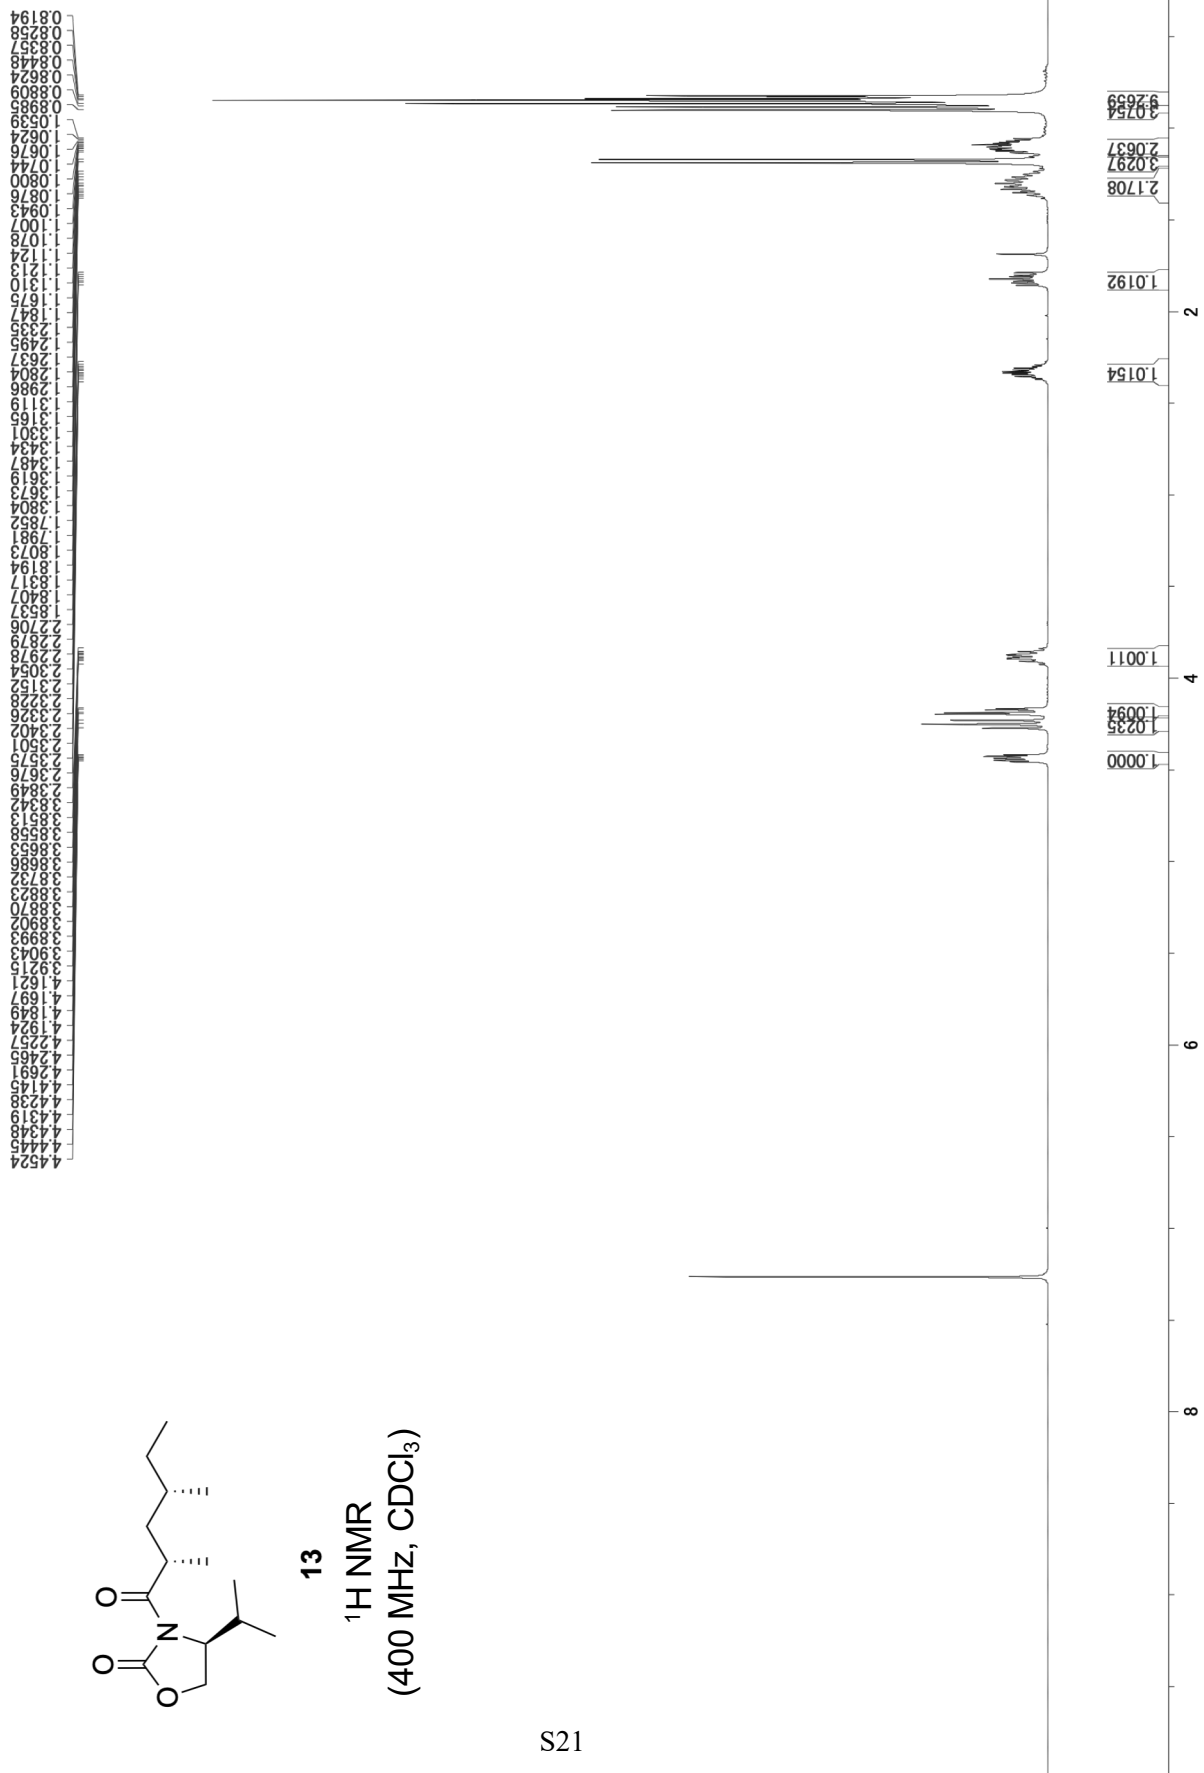

19.5403  
 19.0647  
 18.1280  
 14.8776  
 11.4525  
 40.3075  
 35.6185  
 32.5333  
 29.7733  
 28.6107  
 77.4651  
 63.3779  
 58.6117

177.5947  
 153.8294

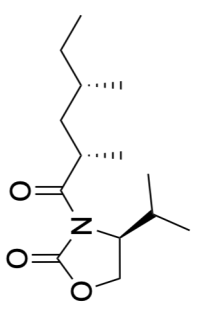

**13**

<sup>13</sup>C NMR  
 (100 MHz, CDCl<sub>3</sub>)

S22

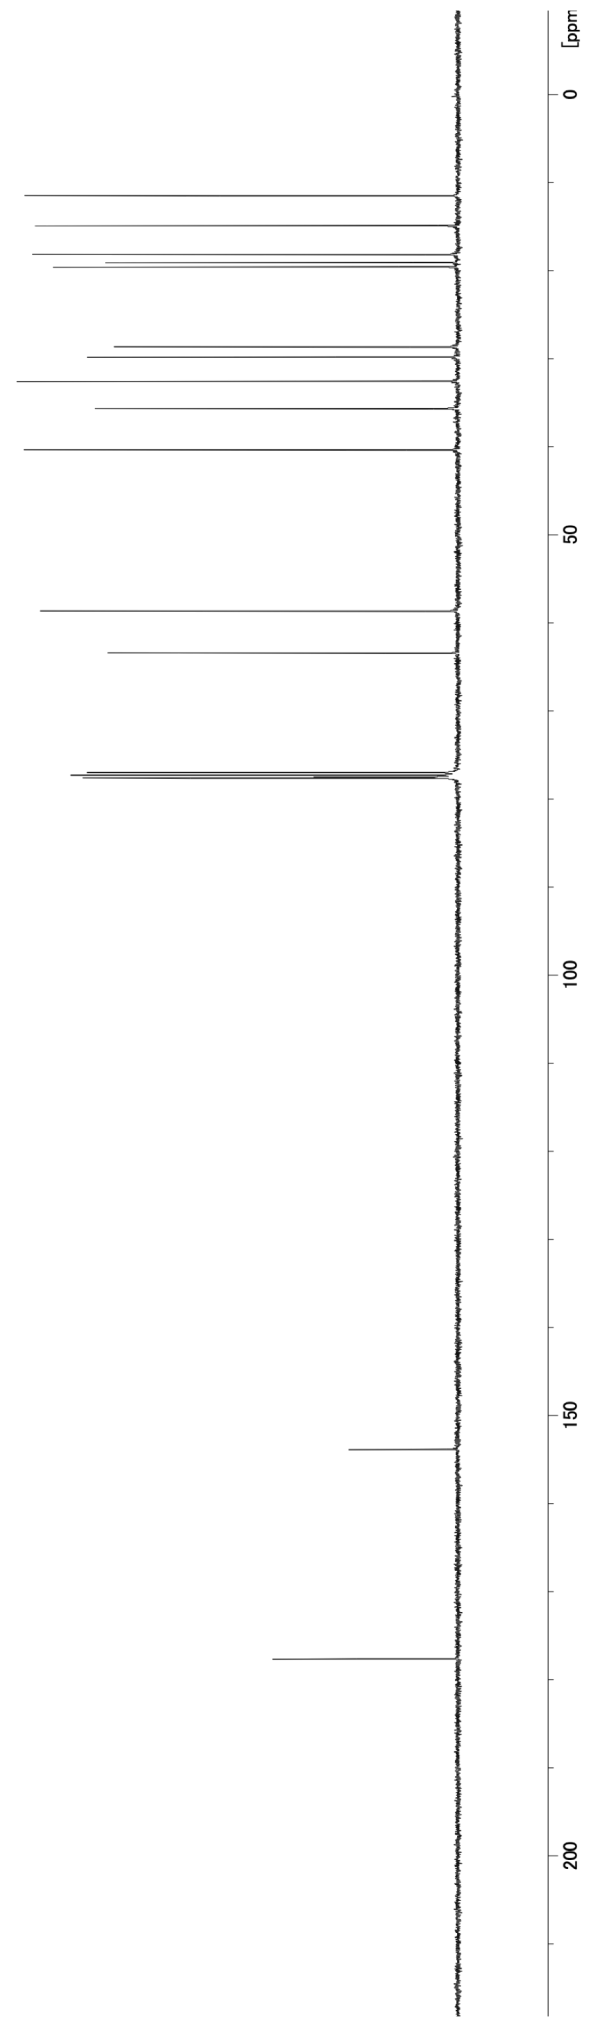

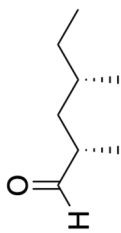

**8**

<sup>1</sup>H NMR  
(400 MHz, CDCl<sub>3</sub>)

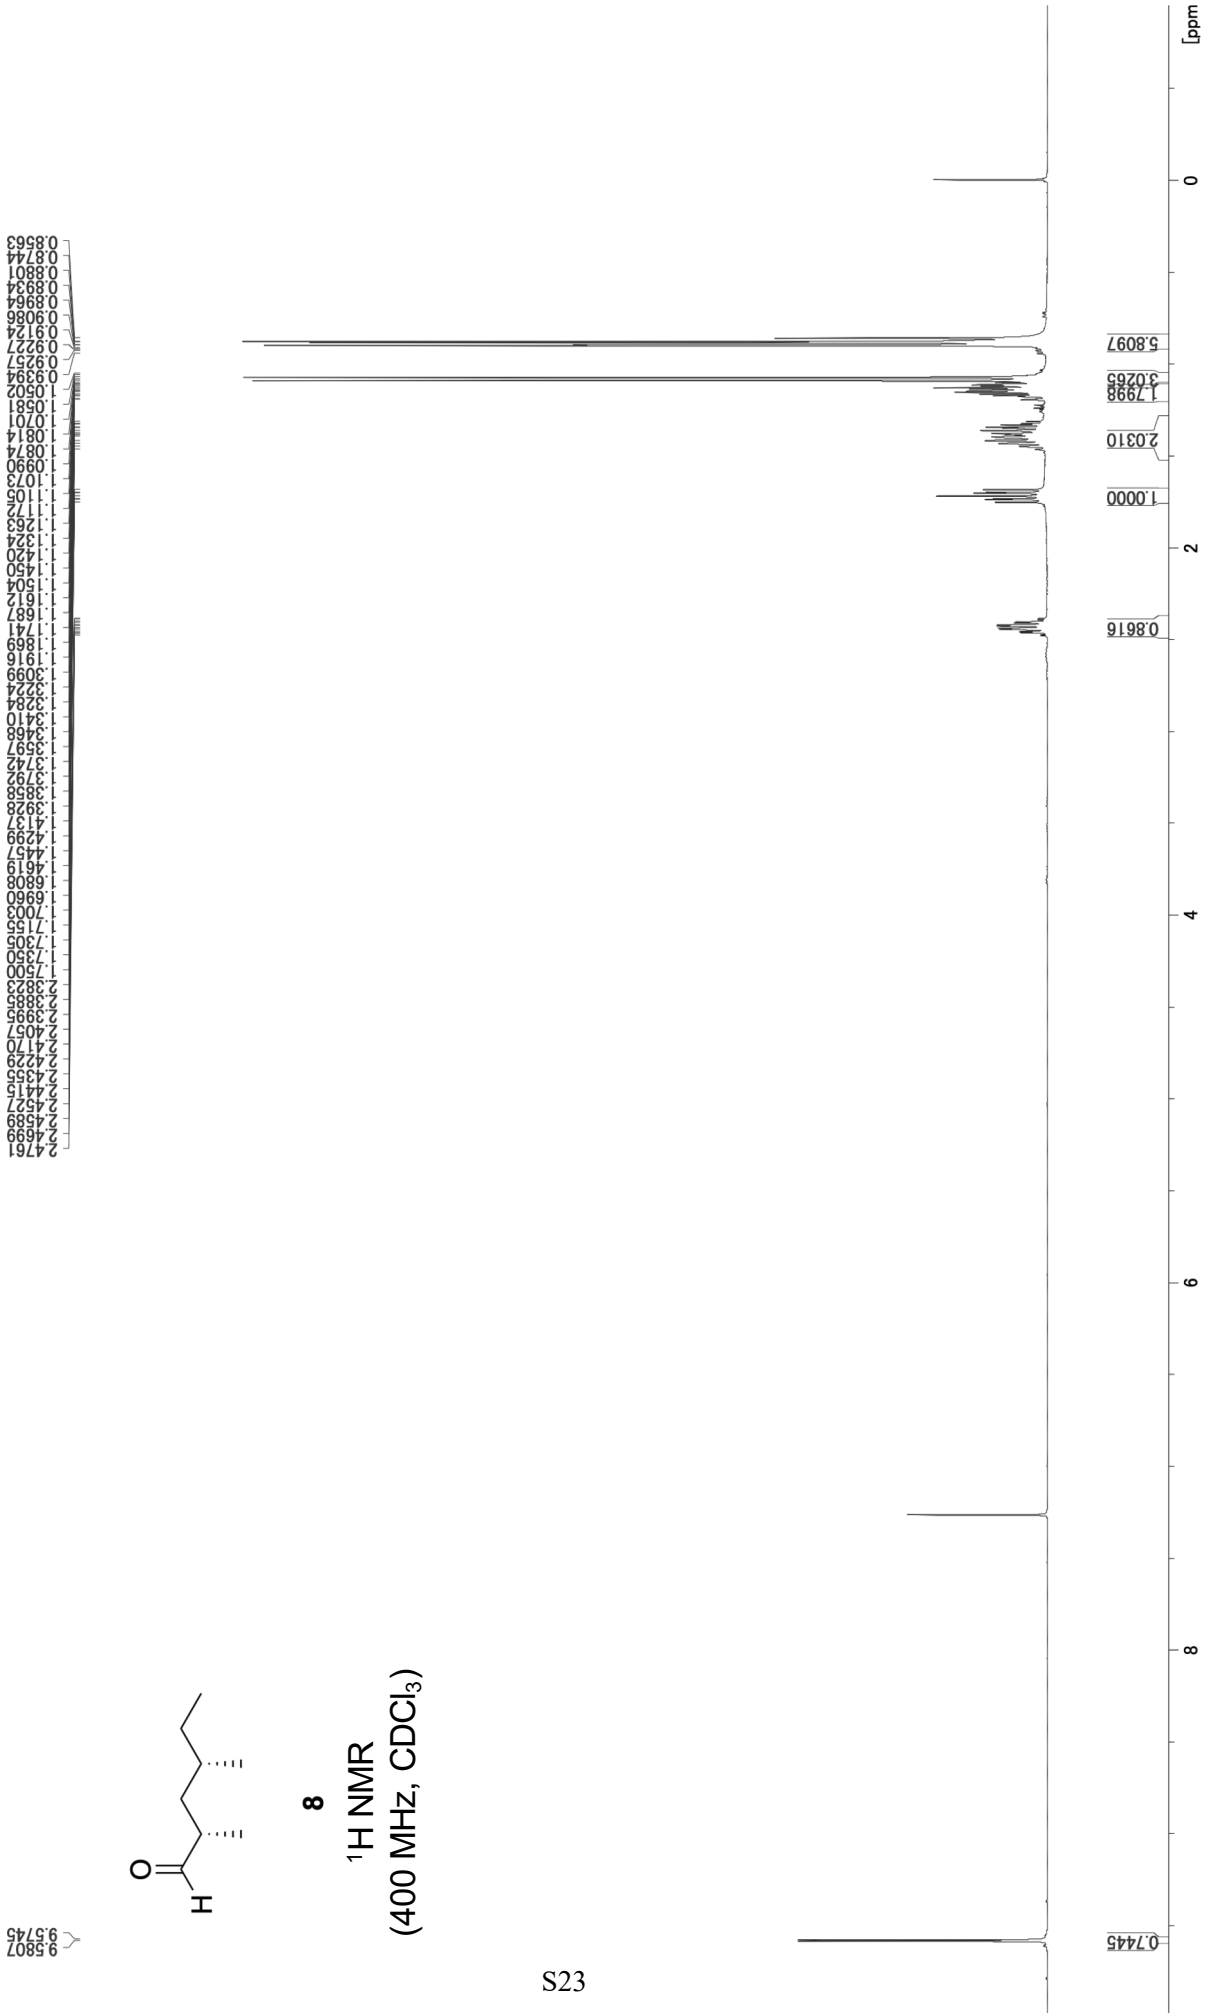



205.8020

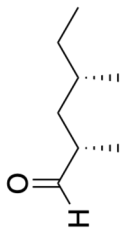

**8**

<sup>13</sup>C NMR  
(100 MHz, CDCl<sub>3</sub>)

44.4329  
38.1247  
32.2090  
29.4359  
19.5331  
14.201  
11.3588

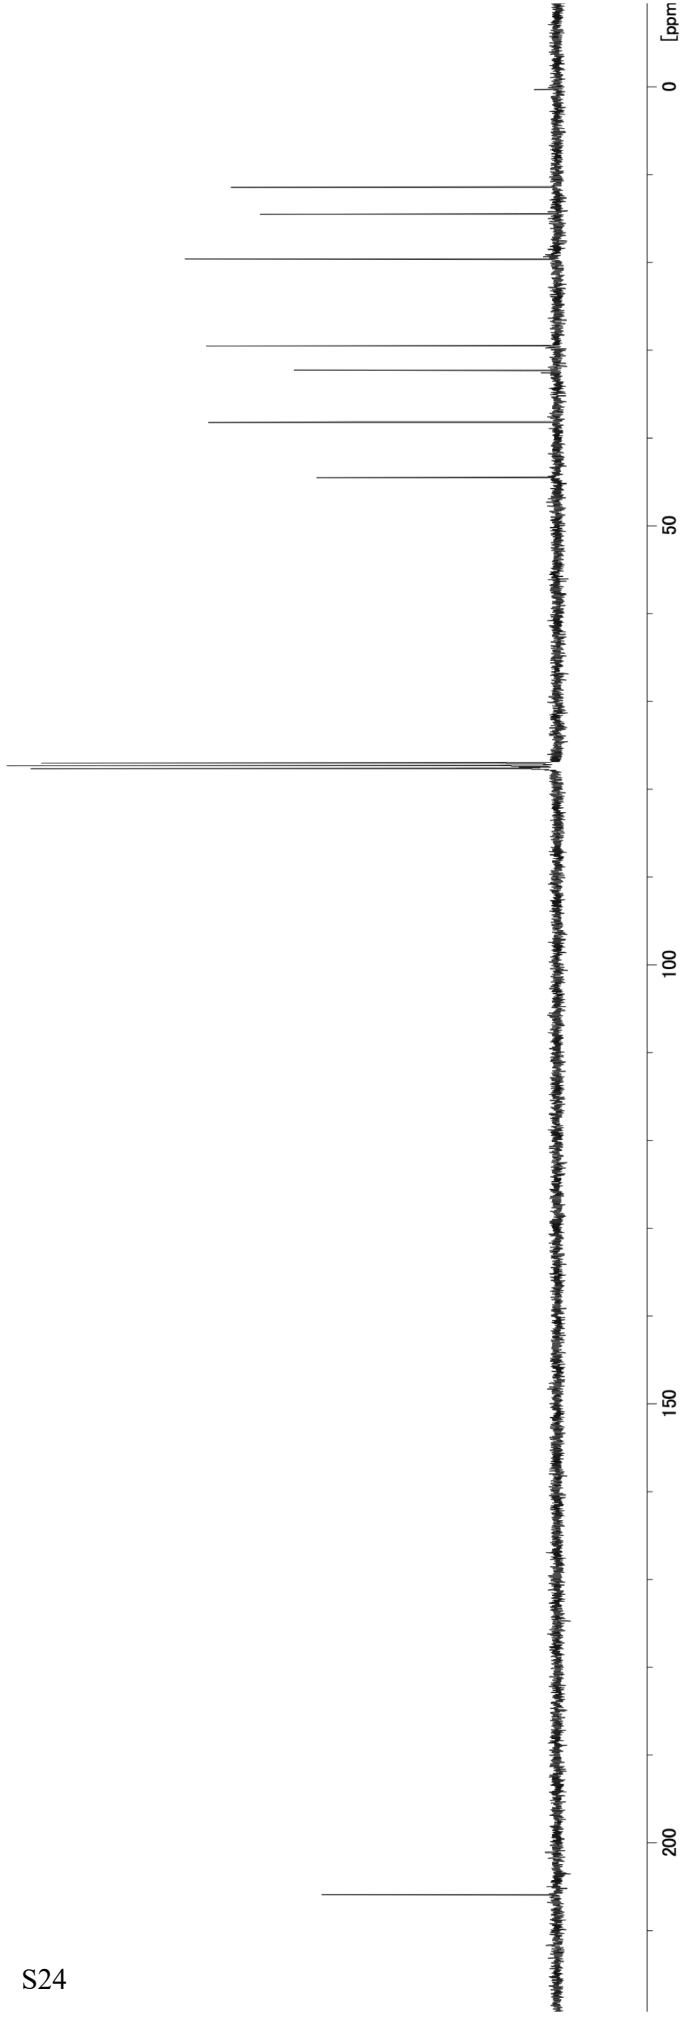

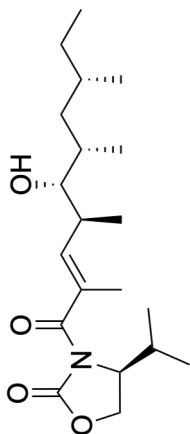

14

<sup>1</sup>H NMR  
(400 MHz, CDCl<sub>3</sub>)

5.7939  
5.7904  
5.7682  
5.7648  
5.7648  
5.5948  
5.5832  
5.5832  
4.5805  
4.5722  
4.5693  
4.5609  
4.5468  
4.5372  
4.3348  
4.3172  
4.1972  
4.1827  
4.1747  
4.1602  
3.2648  
3.2421  
3.0685  
2.7782  
2.7617  
2.7530  
2.7451  
2.7376  
2.7291  
2.7132  
2.7047  
2.6966  
2.6802  
2.3807  
2.3633  
2.3518  
2.3459  
2.3345  
2.3286  
2.3172  
2.2999  
1.9439  
1.9405  
1.8180  
1.8055  
1.8012  
1.7883  
1.7712  
1.5358  
1.5203  
1.5021  
1.4875  
1.4693  
1.4512  
1.4353  
1.4189  
1.4031  
1.3884  
1.3701  
1.3561  
1.3438  
1.3368  
1.3253  
1.1402  
1.1217  
1.1164  
1.1055  
1.0978  
1.0898  
1.0797  
1.0729  
1.0647  
1.0462  
1.0277  
0.9361  
0.9277  
0.9166  
0.9106  
0.8996  
0.8781  
0.8595  
0.8505  
0.8411  
0.8346

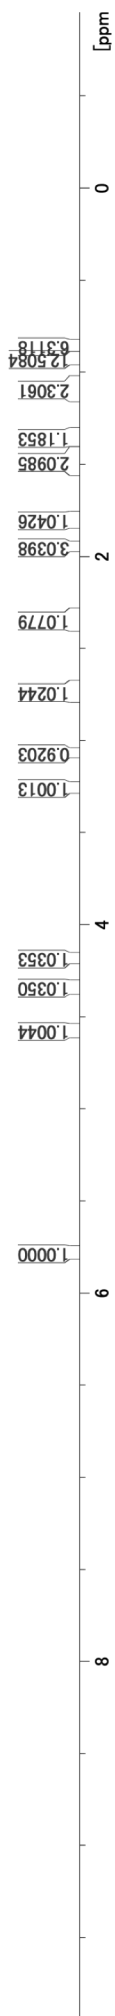

19.4785  
 18.0003  
 15.7235  
 15.3643  
 14.0913  
 12.9096  
 11.3935  
 31.4685  
 30.9144  
 29.6770  
 28.5592  
 41.7778  
 37.5735  
 76.4860  
 77.3694

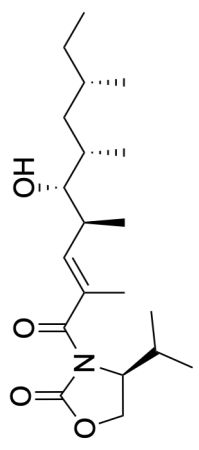

**14**  
<sup>13</sup>C NMR  
 (100 MHz, CDCl<sub>3</sub>)

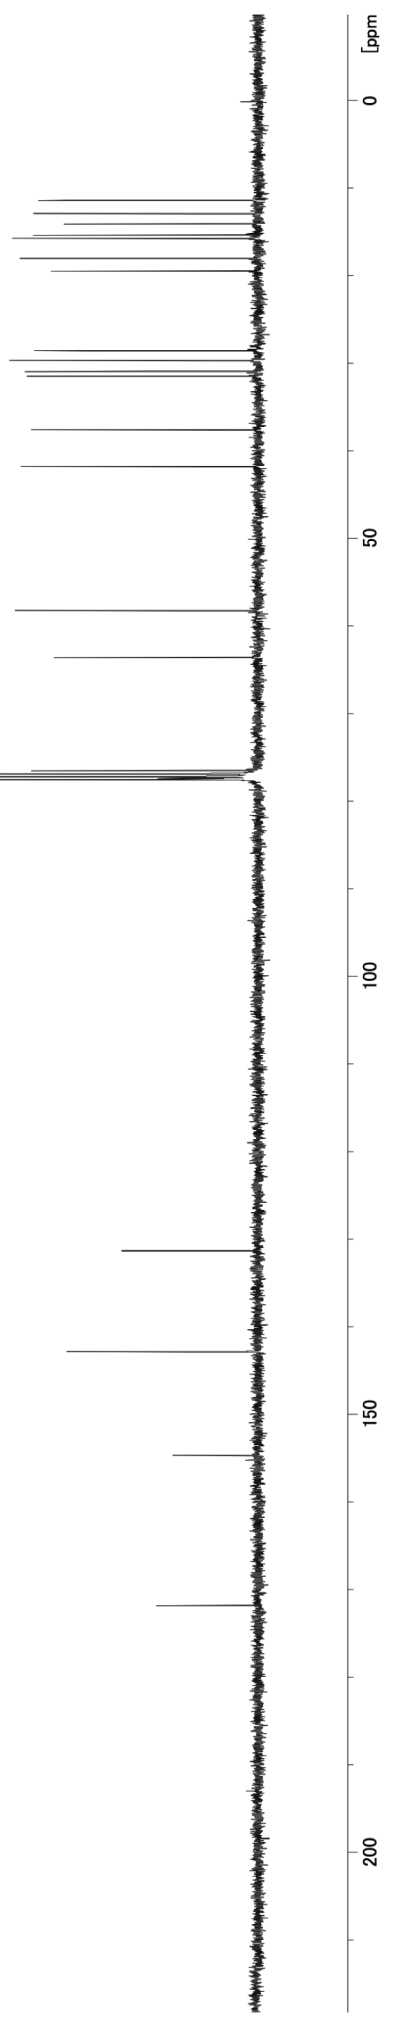

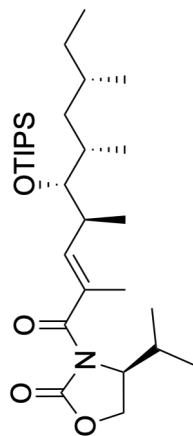

**15**

<sup>1</sup>H NMR  
(400 MHz, CDCl<sub>3</sub>)

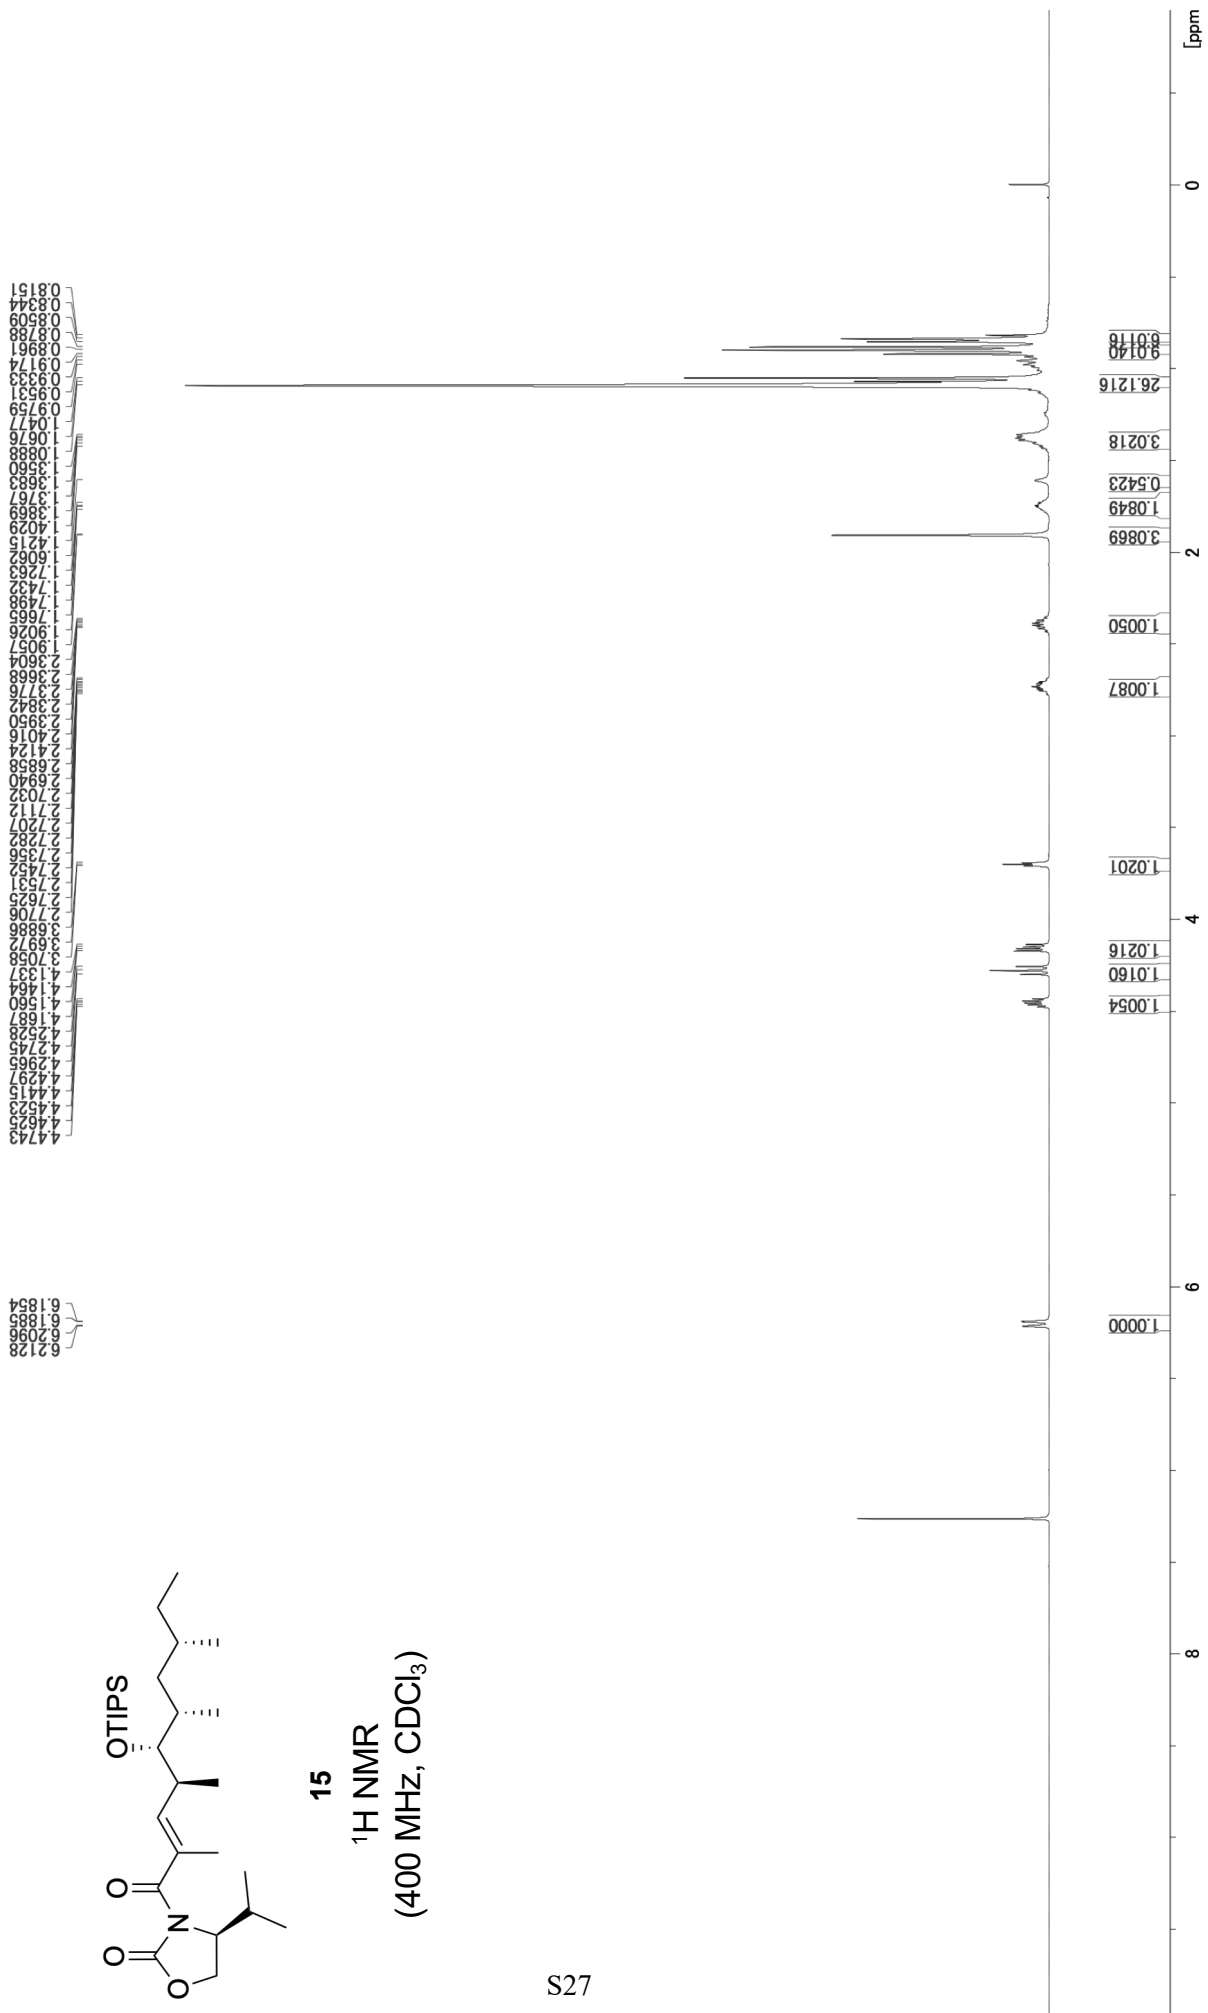

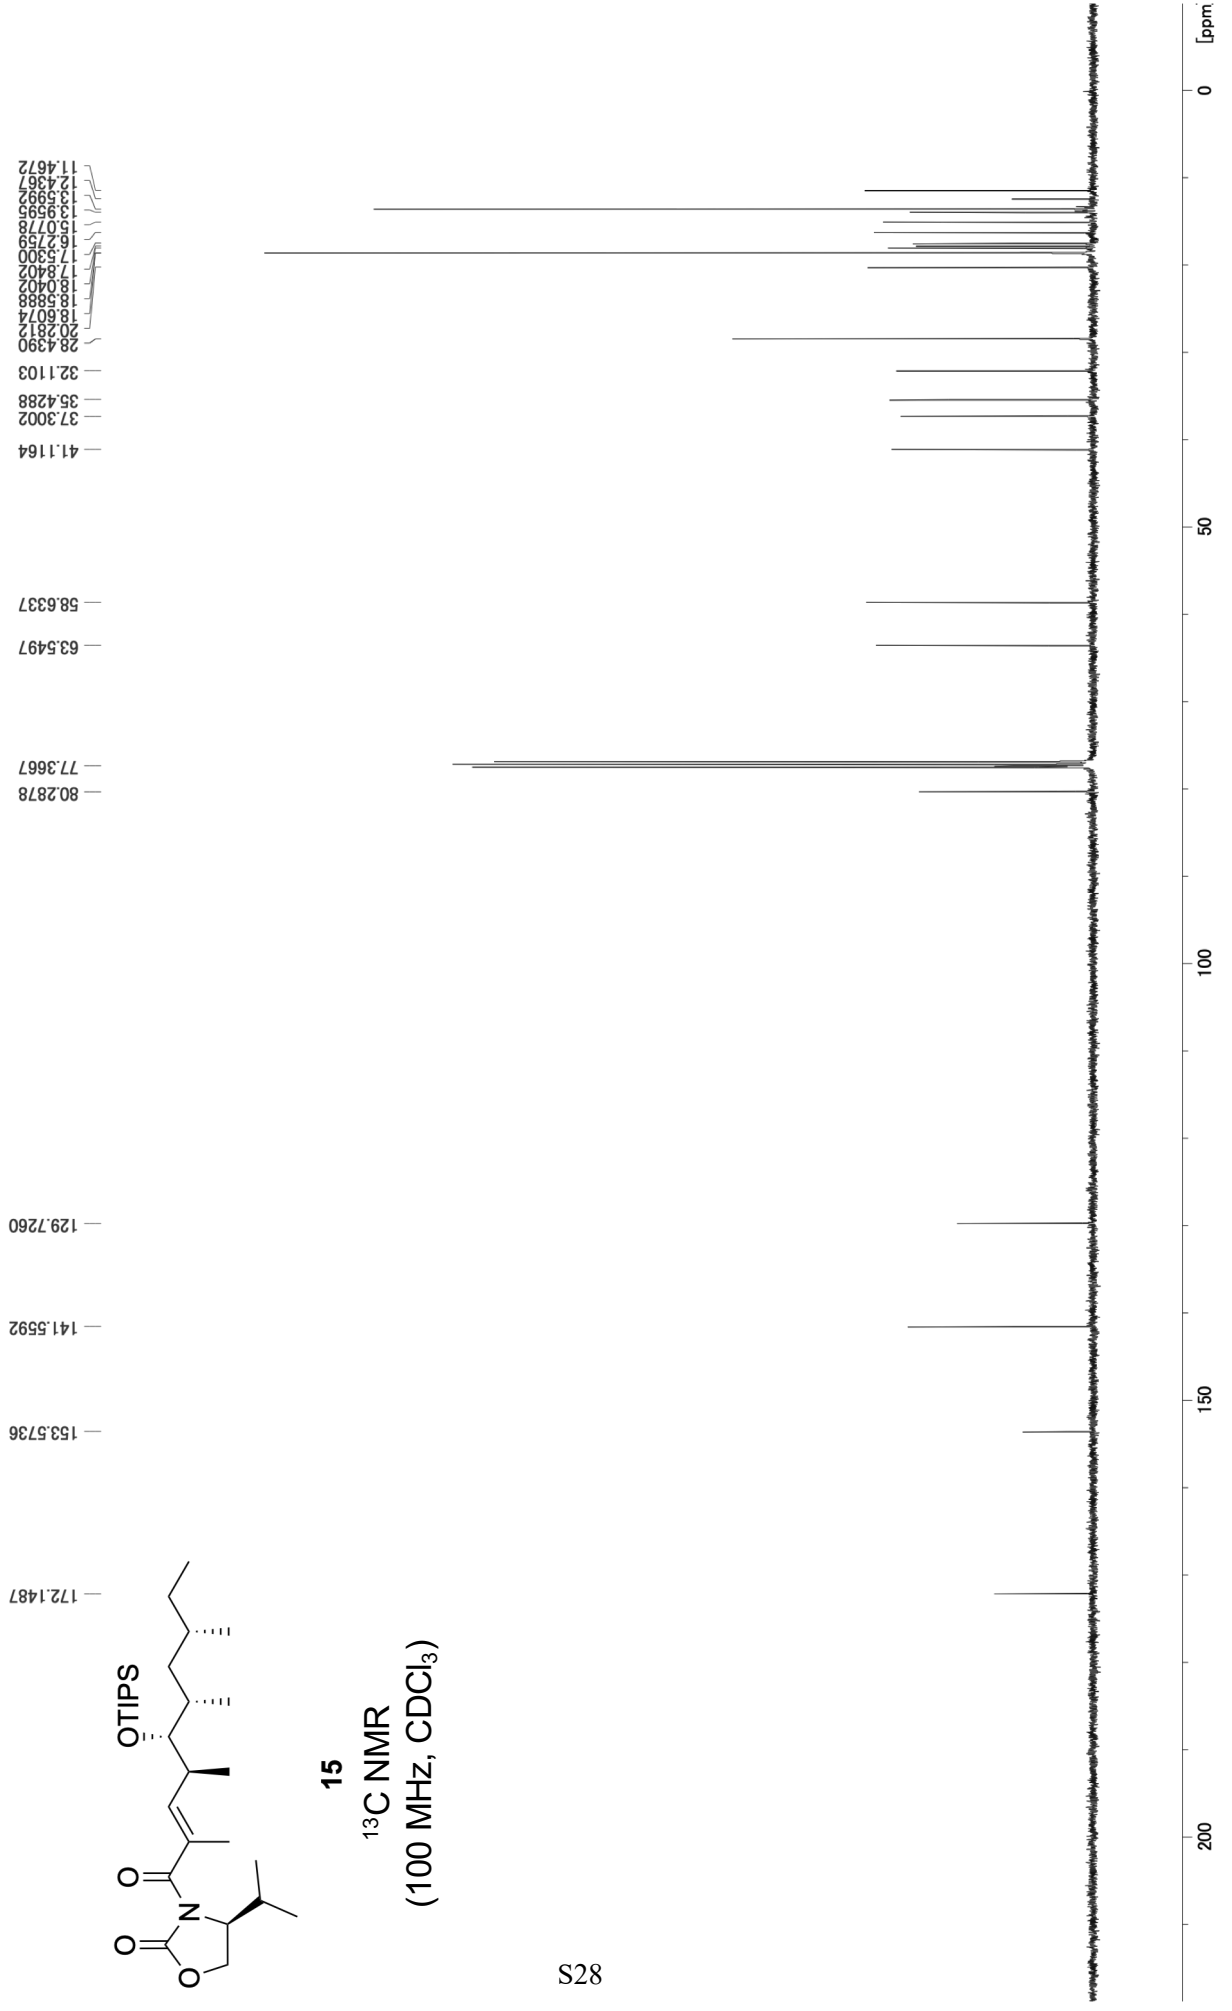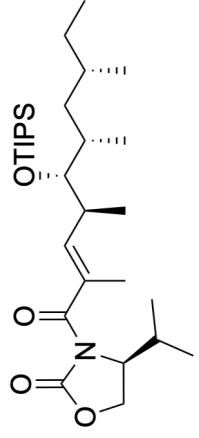

**15**  
<sup>13</sup>C NMR  
(100 MHz, CDCl<sub>3</sub>)

2.9283  
 2.9204  
 2.9108  
 2.9035  
 2.8957  
 2.8863  
 2.8785  
 2.8693  
 2.8609  
 1.7574  
 1.751  
 1.7369  
 1.7282  
 1.7192  
 1.7112  
 1.3886  
 1.3780  
 1.3689  
 1.3579  
 1.3497  
 1.0921  
 0.9789  
 0.9590  
 0.9453  
 0.9405  
 0.9270  
 0.9189  
 0.9053  
 0.8880  
 0.8501  
 0.8407  
 0.8242  
 0.8113  
 0.8054

3.758  
 3.753  
 3.758

6.702  
 6.7460  
 6.5687

9.3913

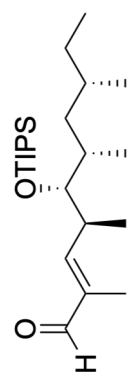

**6**

<sup>1</sup>H NMR  
 (400 MHz, CDCl<sub>3</sub>)

625

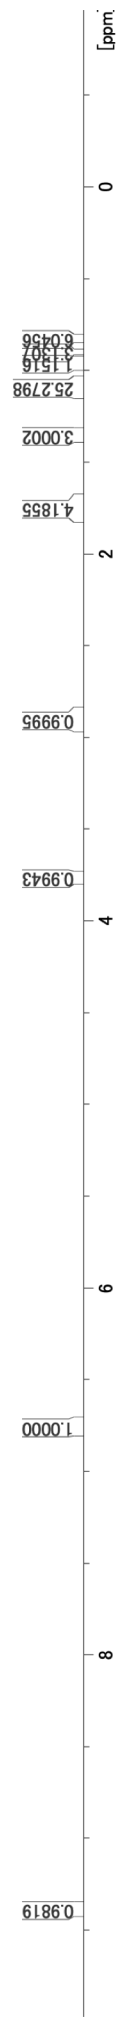

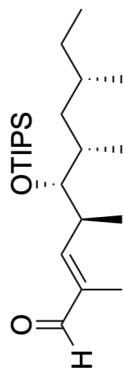

**6**

<sup>13</sup>C NMR  
(100 MHz, CDCl<sub>3</sub>)

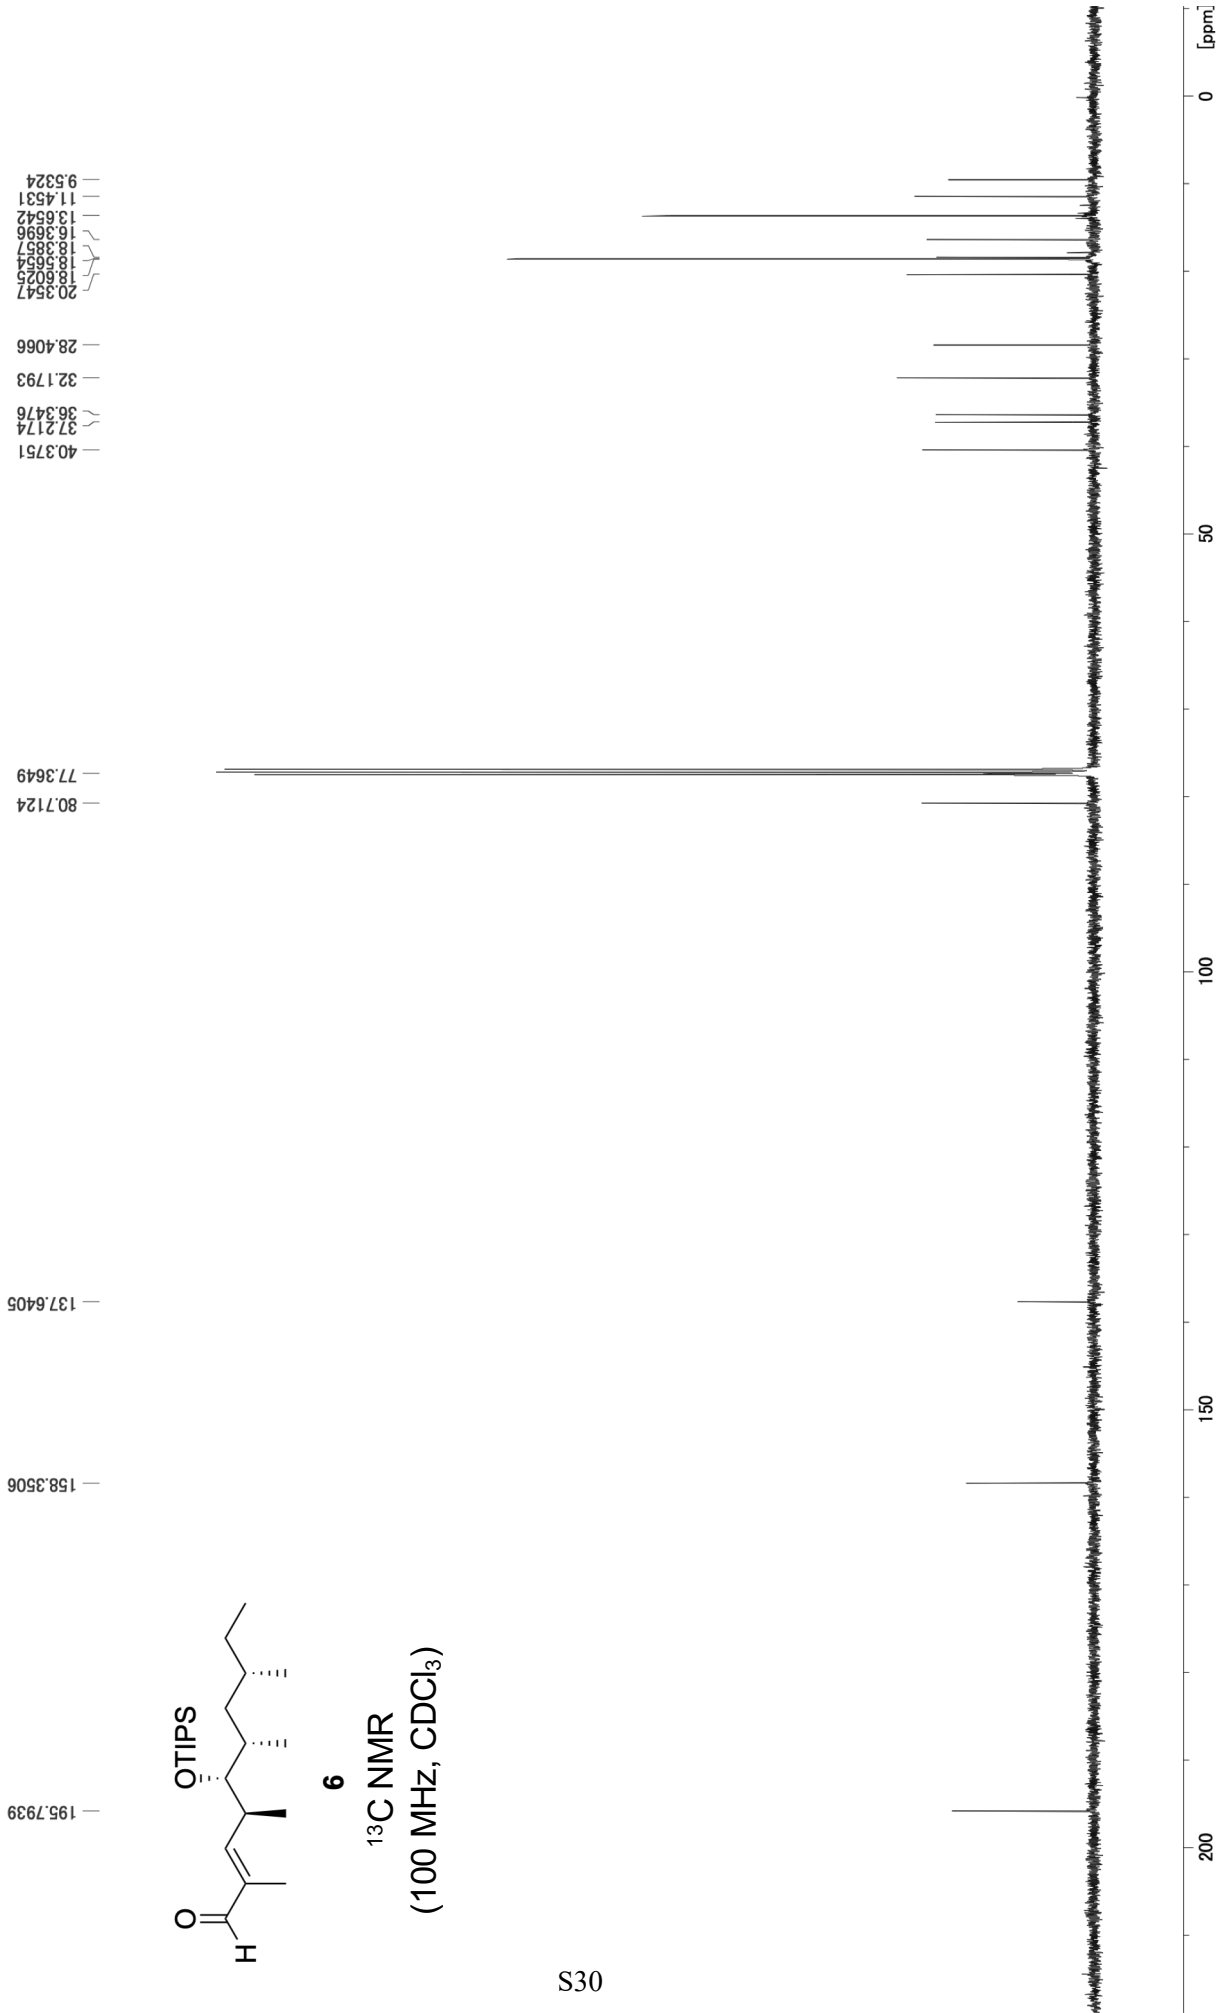

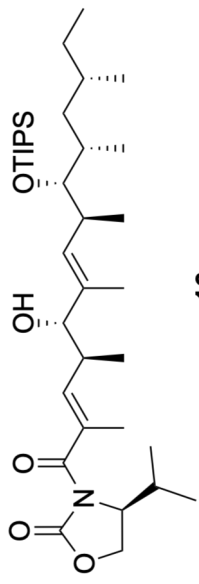

**16**

<sup>1</sup>H NMR  
(400 MHz, CDCl<sub>3</sub>)

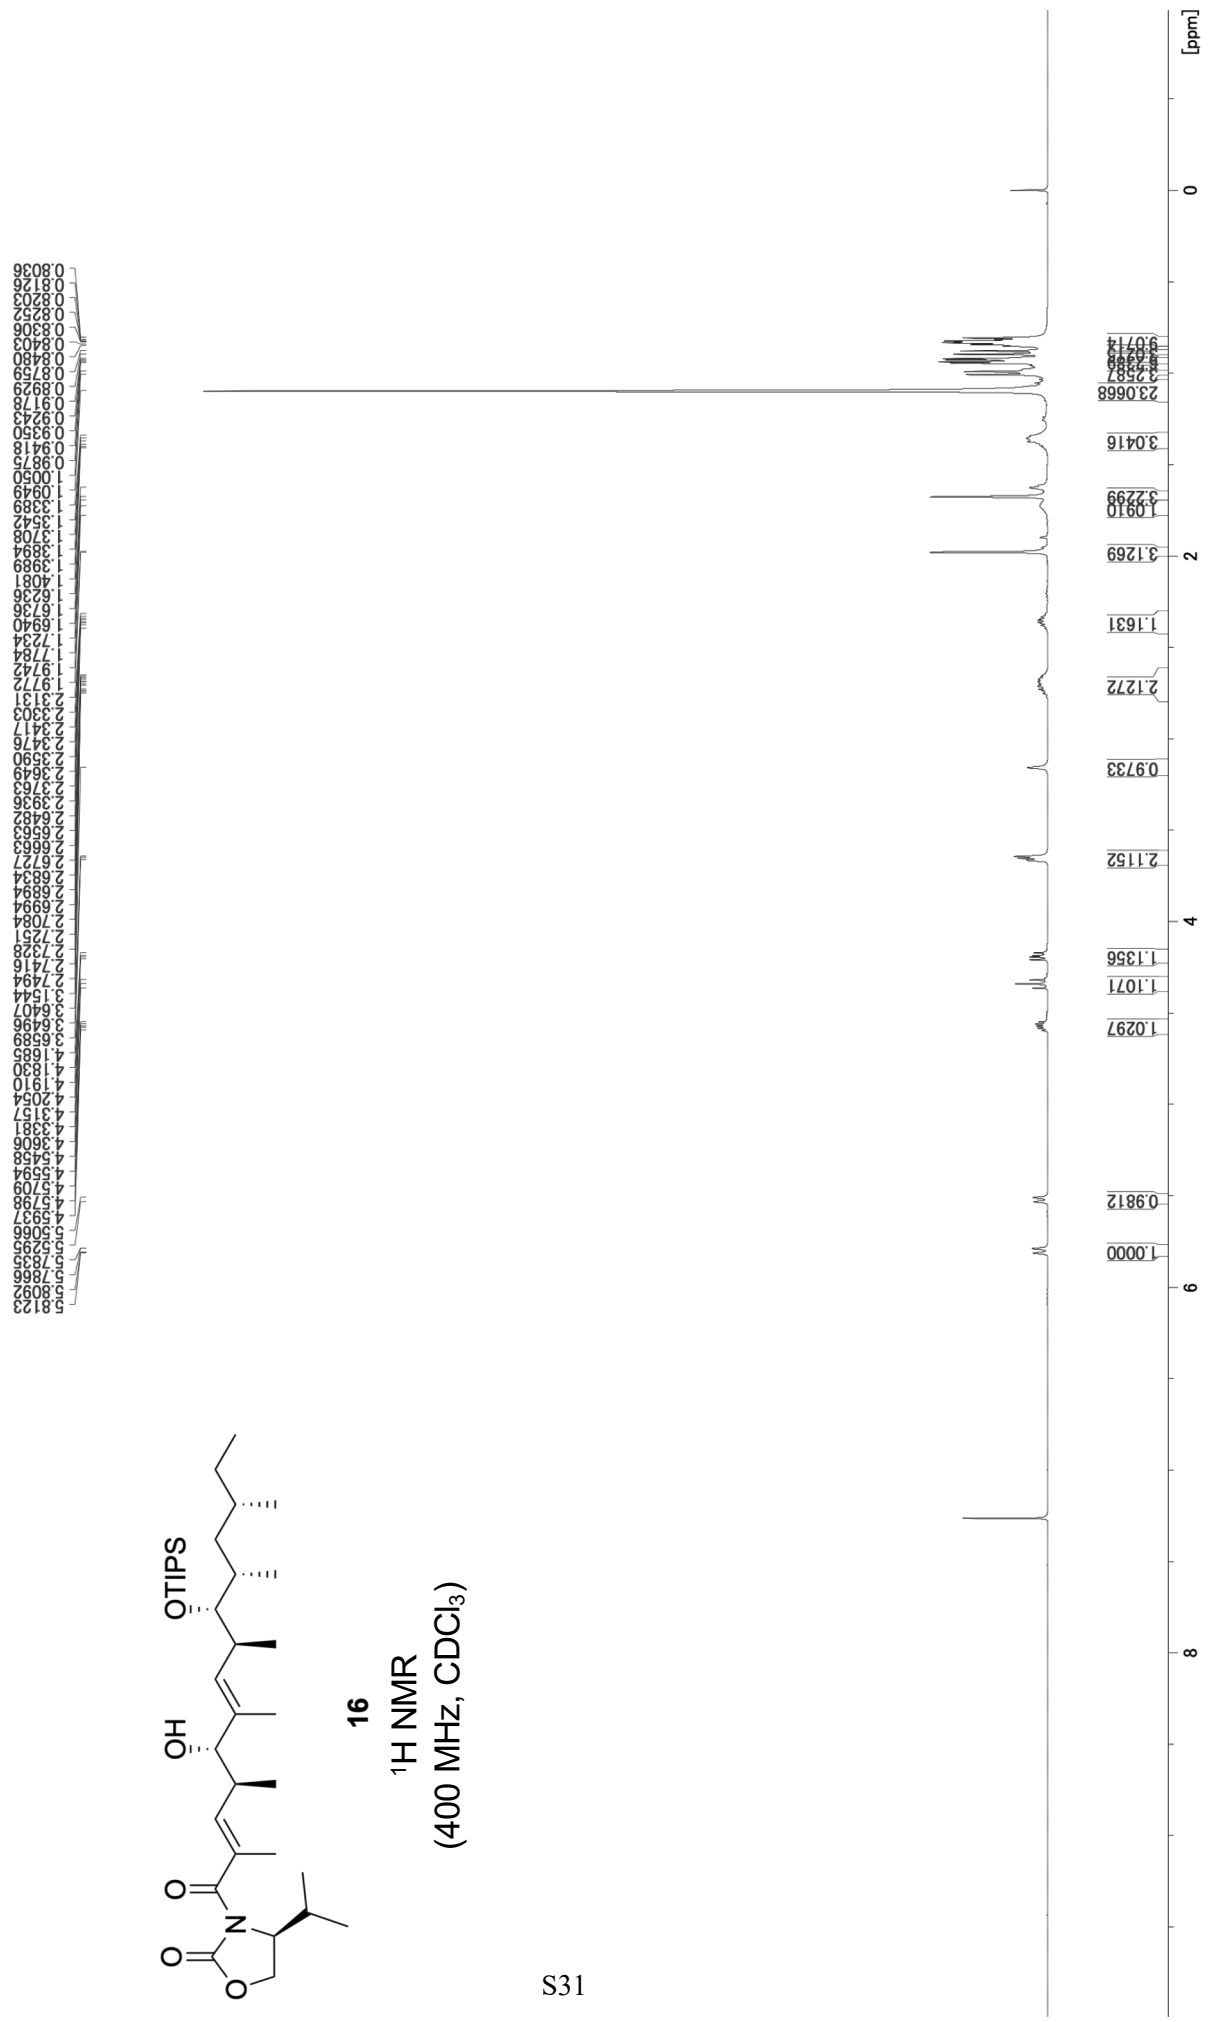



11.2328  
 11.4381  
 13.6156  
 14.1453  
 15.3649  
 16.3086  
 16.3690  
 18.0203  
 18.3340  
 18.6096  
 18.6523  
 20.2499  
 20.5476  
 28.5903  
 32.0176  
 34.9357  
 37.1382  
 38.2819  
 41.8643

132.9573  
 132.3855  
 131.8937  
 142.2852  
 154.5904  
 171.7421

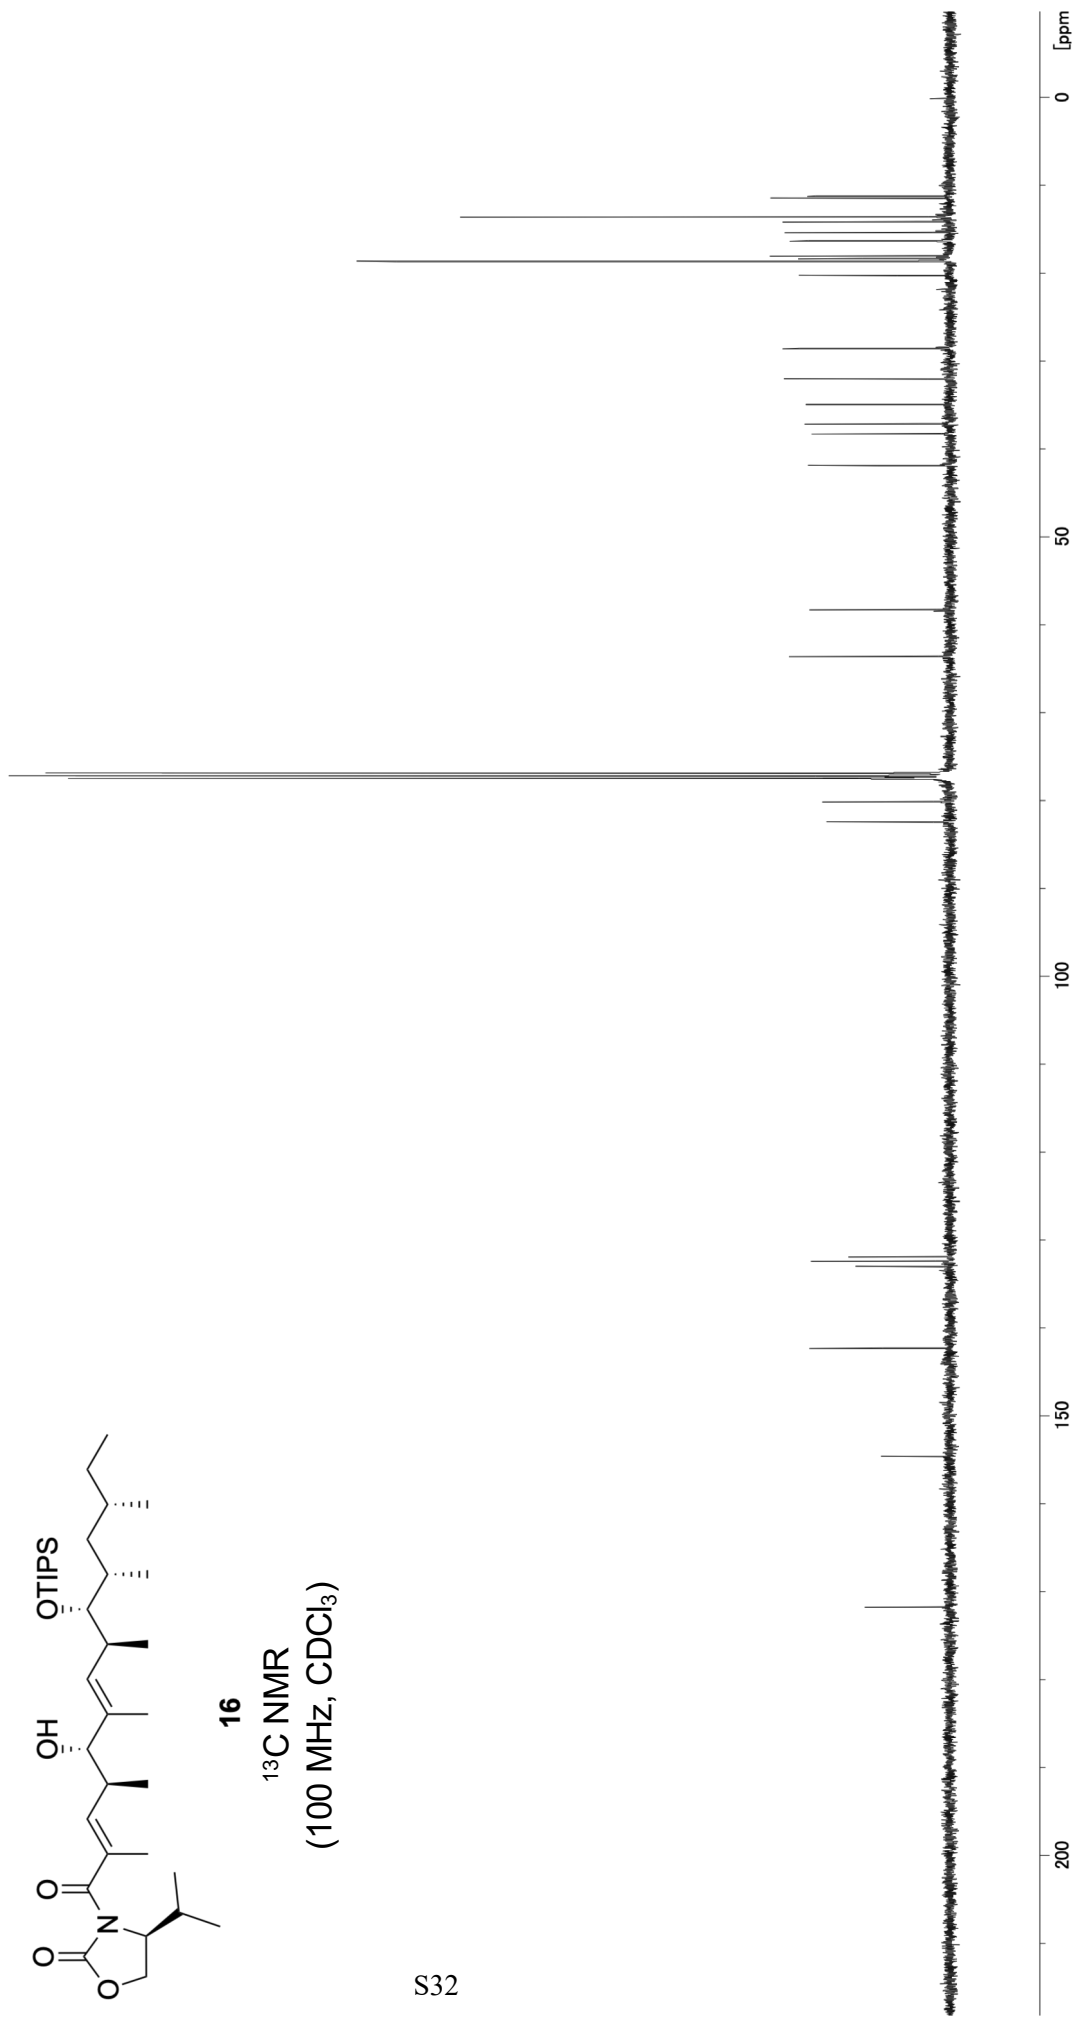

**16**  
<sup>13</sup>C NMR  
 (100 MHz, CDCl<sub>3</sub>)

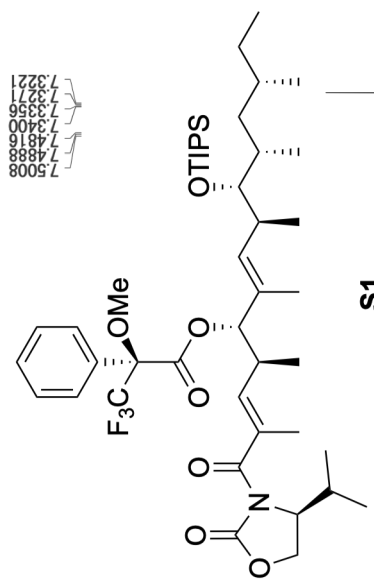

**S1**  
<sup>1</sup>H NMR  
 (400 MHz, CDCl<sub>3</sub>)

5.8176  
 5.7951  
 5.7673  
 5.7638  
 5.7423  
 5.7390  
 5.3839  
 5.2813  
 4.4642  
 4.4530  
 4.4423  
 4.4318  
 4.4208  
 4.4315  
 4.3155  
 4.2934  
 4.2716  
 4.1934  
 4.1819  
 4.1594  
 4.1594  
 3.6654  
 3.6581  
 3.6503  
 3.5043  
 2.9219  
 2.9045  
 2.8809  
 2.8630  
 2.8570  
 2.8397  
 2.8230  
 2.6806  
 2.6746  
 2.6400  
 2.4351  
 2.4182  
 2.4074  
 2.4004  
 2.3902  
 2.3832  
 2.3728  
 2.3555  
 2.3555  
 1.7788  
 1.6773  
 1.6819  
 1.5343  
 1.3881  
 1.3769  
 1.3686  
 1.3559  
 1.3452  
 1.3353  
 1.3262  
 1.2777  
 1.2569  
 1.0891  
 1.0334  
 1.0158  
 0.9348  
 0.9173  
 0.9028  
 0.8850  
 0.8660  
 0.8176  
 0.7997  
 0.7791

7.5008  
 7.4888  
 7.4816  
 7.3400  
 7.3356  
 7.3271  
 7.3221

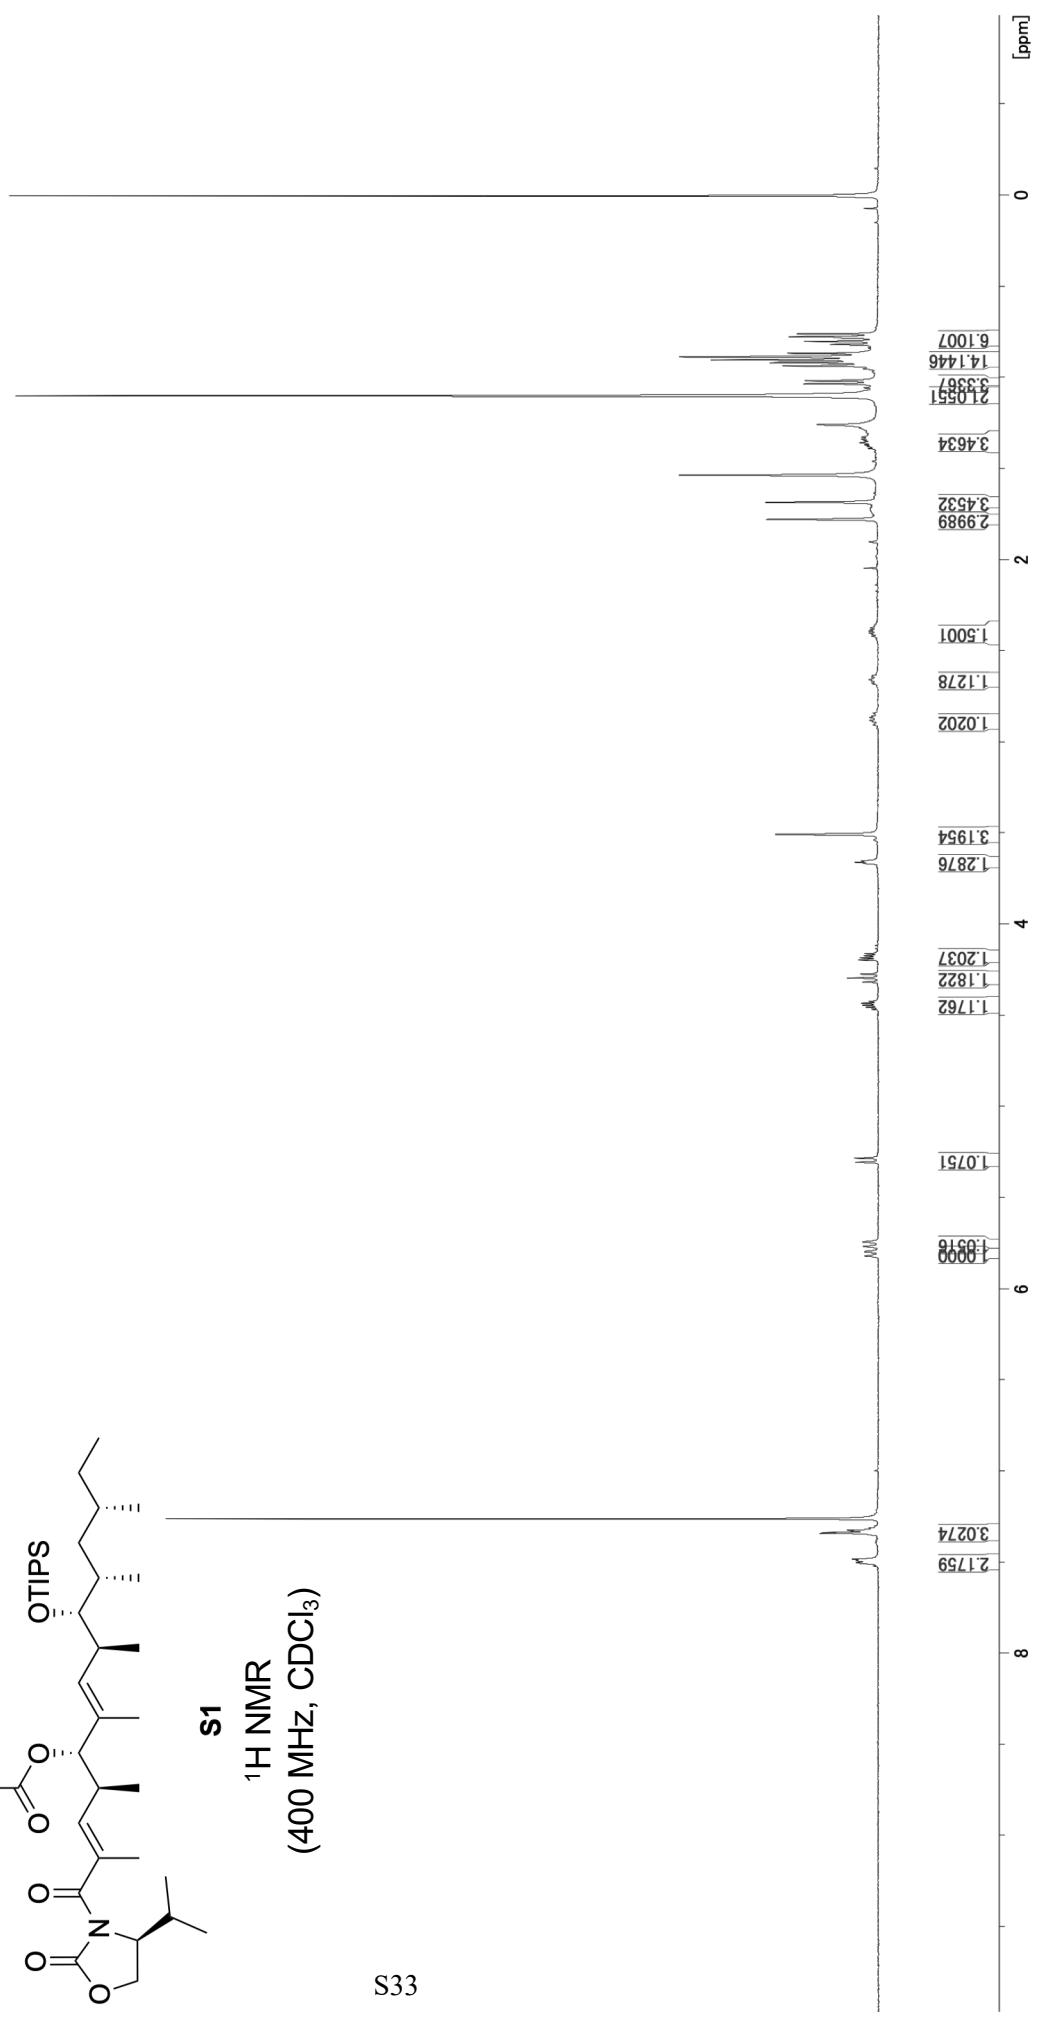

5.8097  
 5.8060  
 5.7970  
 5.7851  
 5.7714  
 5.7514  
 5.7315  
 4.840  
 4.4730  
 4.4623  
 4.4517  
 4.4407  
 4.4317  
 4.3096  
 4.2877  
 4.2061  
 4.1847  
 4.1722  
 3.6643  
 3.6578  
 3.6494  
 3.5344  
 3.5047  
 3.3203  
 2.9198  
 2.9030  
 2.8857  
 2.8787  
 2.8615  
 2.8544  
 2.8370  
 2.8202  
 2.6365  
 2.6191  
 2.6018  
 2.4330  
 2.4160  
 2.4051  
 2.3986  
 2.3879  
 2.3812  
 2.3706  
 2.3540  
 2.3533  
 1.8718  
 1.8522  
 1.7403  
 1.7144  
 1.4619  
 1.4596  
 1.4410  
 1.4330  
 1.4283  
 1.4216  
 1.4085  
 1.3981  
 1.3761  
 1.3458  
 1.2777  
 1.2596  
 1.1019  
 1.0013  
 0.9837  
 0.9388  
 0.9212  
 0.9024  
 0.8851  
 0.8714  
 0.8514  
 0.8274

7.4984  
 7.4891  
 7.3673  
 7.3583  
 7.3507

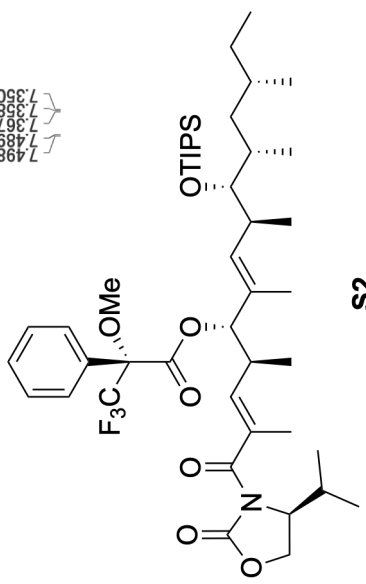

**S2**

<sup>1</sup>H NMR  
(400 MHz, CDCl<sub>3</sub>)

S34

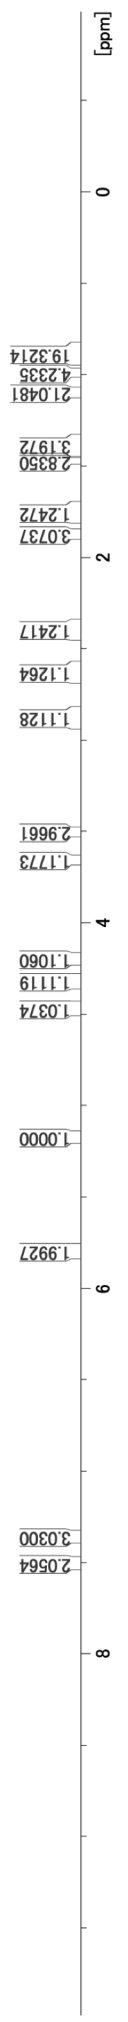

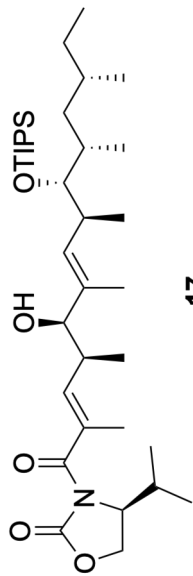

17

<sup>1</sup>H NMR  
(400 MHz, CDCl<sub>3</sub>)

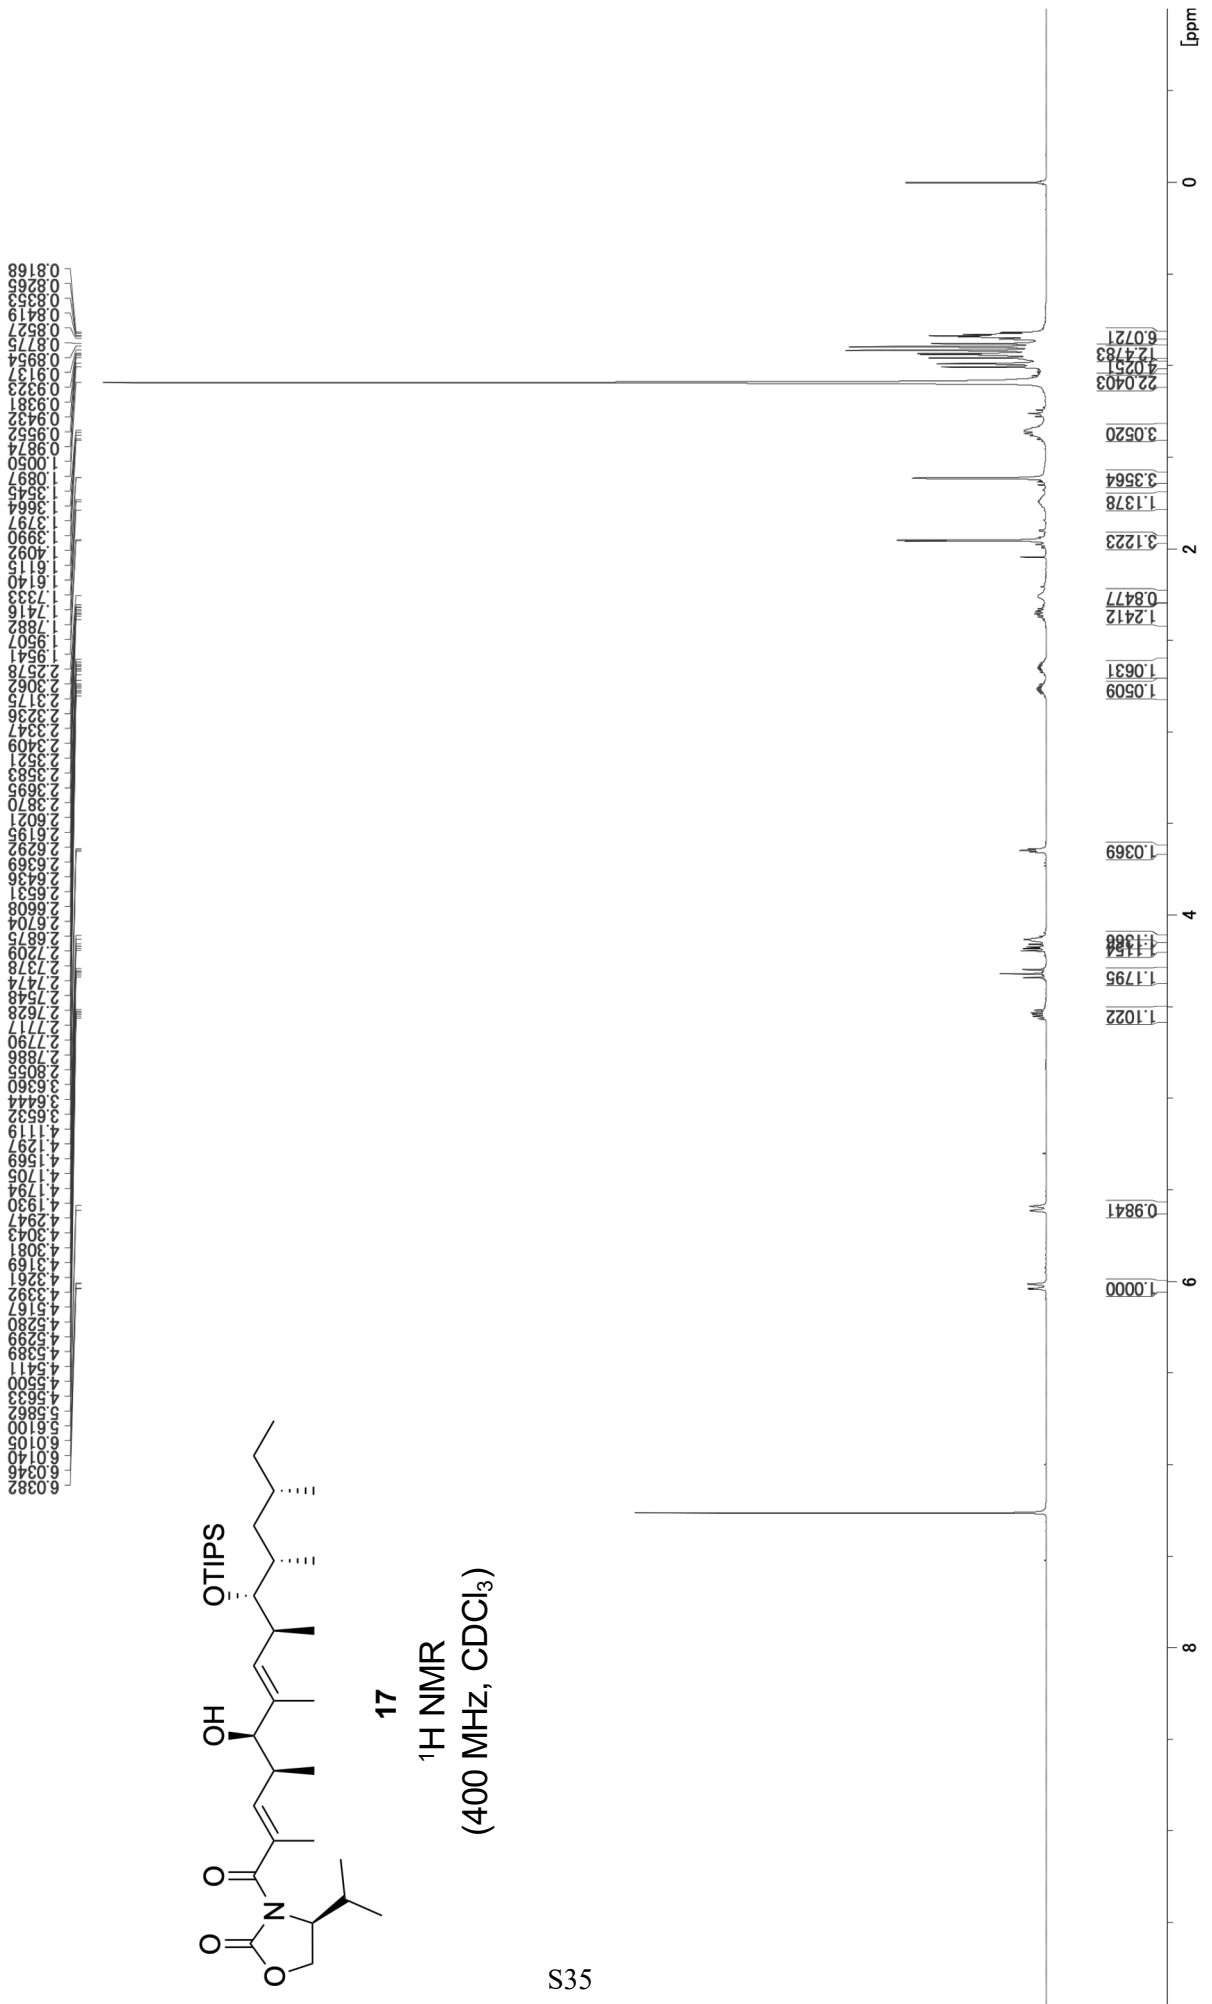

11.2964  
 13.0887  
 13.4649  
 13.6435  
 13.9828  
 15.1144  
 15.9408  
 17.8454  
 18.0076  
 18.4417  
 18.4857  
 20.0337  
 28.4191  
 28.5917  
 31.8966  
 34.3728  
 37.1673  
 37.2259  
 42.0329

63.4274  
 58.2234  
 78.2985  
 79.9037  
 129.6718  
 129.8220  
 133.3343  
 142.9241  
 154.1195  
 171.6487

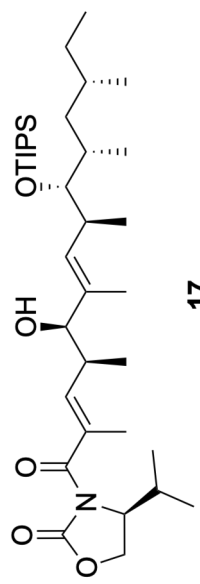

**17**  
<sup>13</sup>C NMR  
 (100 MHz, CDCl<sub>3</sub>)

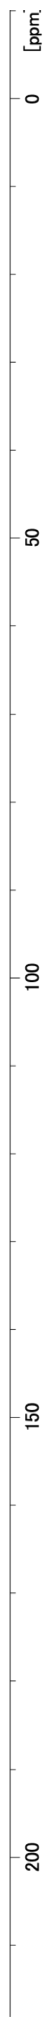

5.7691  
 5.7471  
 5.6462  
 5.6426  
 5.6212  
 5.6177  
 5.2744  
 5.2561  
 4.4230  
 4.4171  
 4.4016  
 4.3909  
 4.3801  
 4.2858  
 4.2636  
 4.2420  
 4.1810  
 4.1696  
 4.1585  
 4.1473  
 4.1357  
 3.6357  
 3.6269  
 3.6203  
 3.5351  
 3.307  
 2.9132  
 2.9056  
 2.8956  
 2.8883  
 2.8833  
 2.8708  
 2.6037  
 2.5861  
 2.5681  
 2.4276  
 2.4097  
 2.3997  
 2.3926  
 2.3820  
 2.3650  
 2.3576  
 2.472  
 1.9020  
 1.8988  
 1.8888  
 1.7083  
 1.6817  
 1.6514  
 1.6349  
 1.6291  
 1.6125  
 1.5347  
 1.4599  
 1.3572  
 1.3597  
 1.364  
 1.3255  
 0.937  
 0.703  
 0.538  
 1.0351  
 1.0172  
 0.9202  
 0.9026  
 0.8814  
 0.8697  
 0.8894  
 0.8361  
 0.8202

7.510  
 7.4905  
 7.4913  
 7.3916  
 7.3853  
 7.3769  
 7.3620

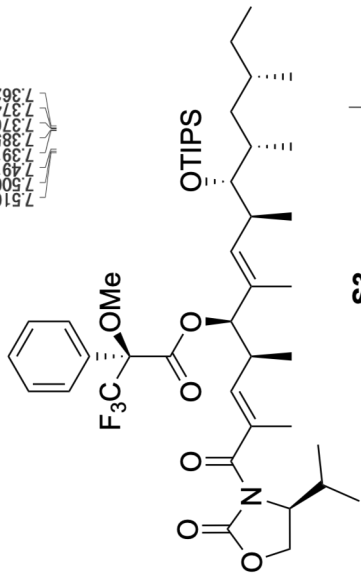

**S3**

$^1H$  NMR  
 (400 MHz,  $CDCl_3$ )

S37

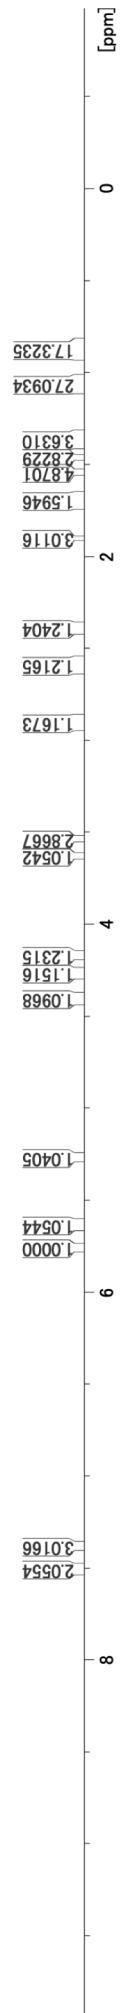

7.5051  
 7.4909  
 7.4853  
 7.3864  
 7.3784  
 7.3732  
 7.3687  
 7.3602  
 7.3514  
 7.3472  
 5.8244  
 5.8015  
 5.7983  
 5.7946  
 5.7733  
 5.7698  
 5.5698  
 5.3402  
 5.3203  
 4.4126  
 4.4018  
 4.3913  
 4.3807  
 4.3700  
 4.2856  
 4.2634  
 4.2419  
 4.1822  
 4.1710  
 4.1598  
 4.1486  
 3.6595  
 3.6513  
 3.6447  
 3.5321  
 2.8988  
 2.8793  
 2.8739  
 2.8621  
 3.1683  
 2.8373  
 2.8312  
 2.6412  
 2.6355  
 2.6179  
 2.5998  
 2.5944  
 2.4150  
 2.4044  
 2.3974  
 2.3869  
 2.3800  
 2.3695  
 2.3529  
 2.3379  
 1.8696  
 1.8739  
 1.6789  
 1.6134  
 1.6109  
 1.5340  
 1.3807  
 1.3663  
 1.3475  
 1.3354  
 1.2566  
 1.0324  
 1.0148  
 0.9685  
 0.9517  
 0.9218  
 0.9041  
 0.8841  
 0.8747  
 0.8669  
 0.8577  
 0.8333  
 0.8188

7.5051  
 7.4909  
 7.4853  
 7.3864  
 7.3784  
 7.3732  
 7.3687  
 7.3602  
 7.3514  
 7.3472

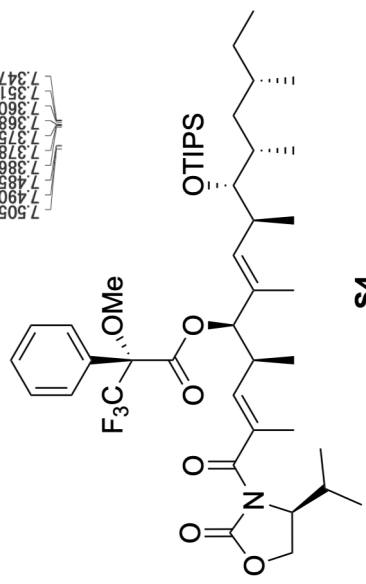

**S4**

<sup>1</sup>H NMR  
 (400 MHz, CDCl<sub>3</sub>)

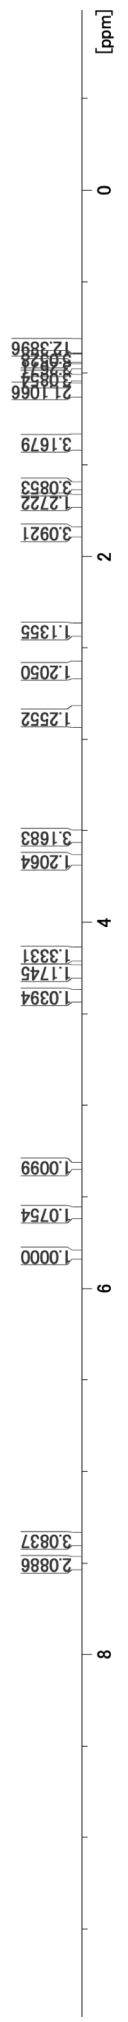

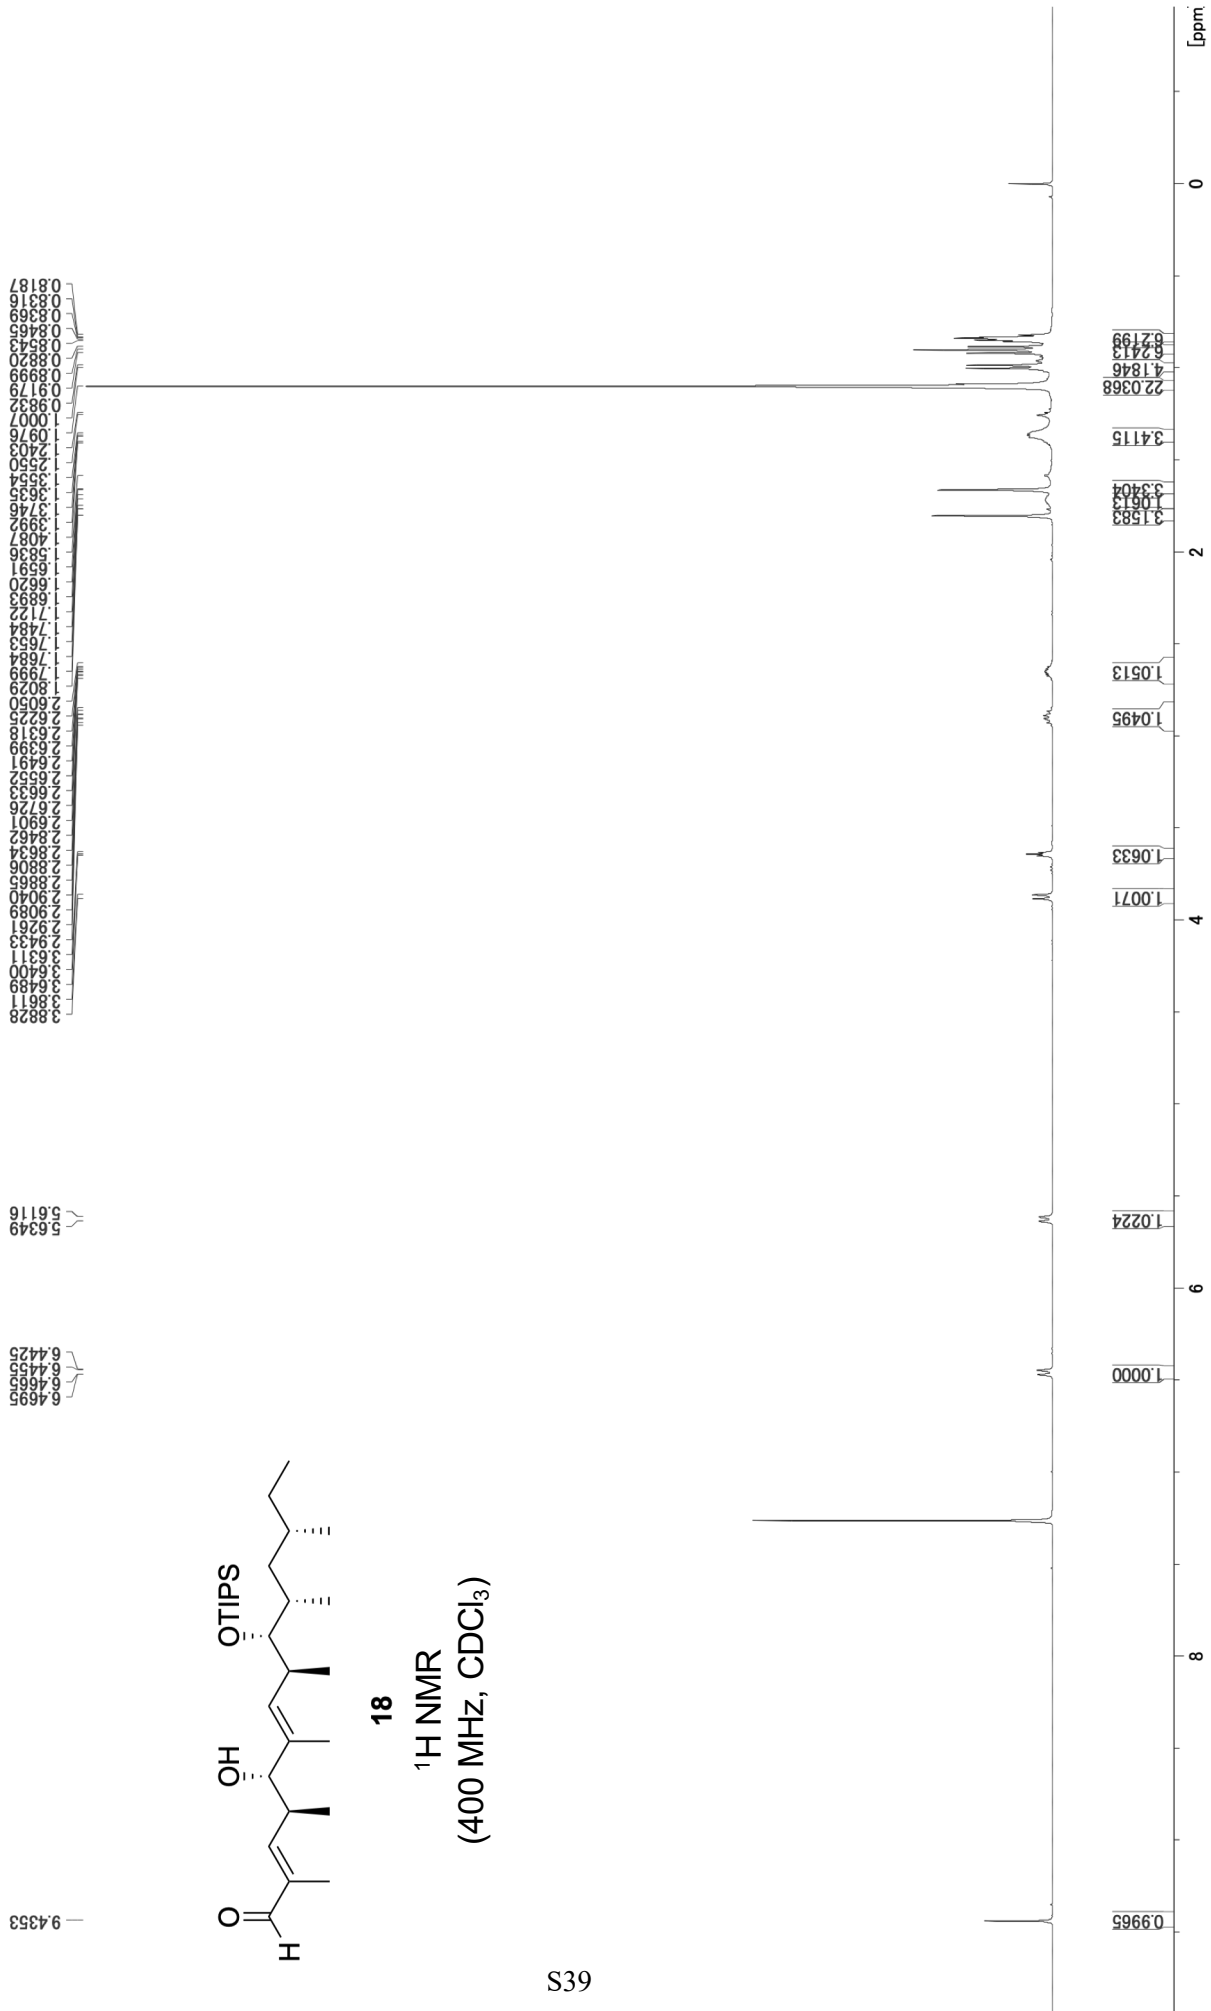



9.6941  
 11.3156  
 11.4110  
 13.7217  
 16.1811  
 18.6108  
 18.9750  
 18.8019  
 18.6394  
 20.3044  
 28.5881  
 32.0649  
 35.2136  
 36.7520  
 37.5982  
 41.5610

77.3661  
 80.4432  
 82.7932

133.5149  
 133.5516  
 139.8328

157.5092

195.4843

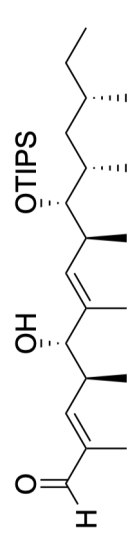

**18**  
<sup>13</sup>C NMR  
 (100 MHz, CDCl<sub>3</sub>)

045

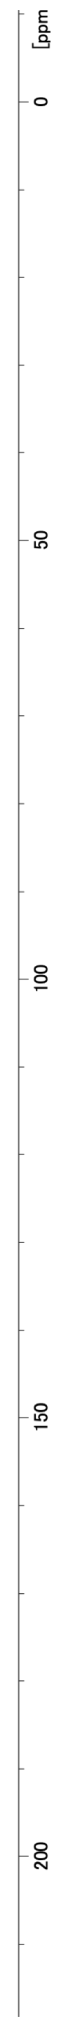

0.8043  
 0.8187  
 0.8354  
 0.8536  
 0.8707  
 0.8998  
 0.9194  
 0.9440  
 0.9611  
 0.9885  
 0.9880  
 1.0437  
 1.0566  
 1.0813  
 1.3106  
 1.3314  
 1.3406  
 1.3511  
 1.3646  
 1.3742  
 1.3797  
 1.5689  
 1.5991  
 1.6883  
 1.7706  
 1.9129  
 2.5904  
 2.5990  
 2.6077  
 2.6149  
 2.6225  
 2.6313  
 2.6399  
 2.6574  
 2.6853  
 3.0024  
 3.0090  
 3.0195  
 3.0261  
 3.0431  
 3.0497  
 3.0601  
 3.0668  
 3.0838  
 3.0997  
 3.6186  
 3.6276

5.1092  
 5.320  
 5.6950  
 5.7184  
 6.3214  
 6.3188

9.3614

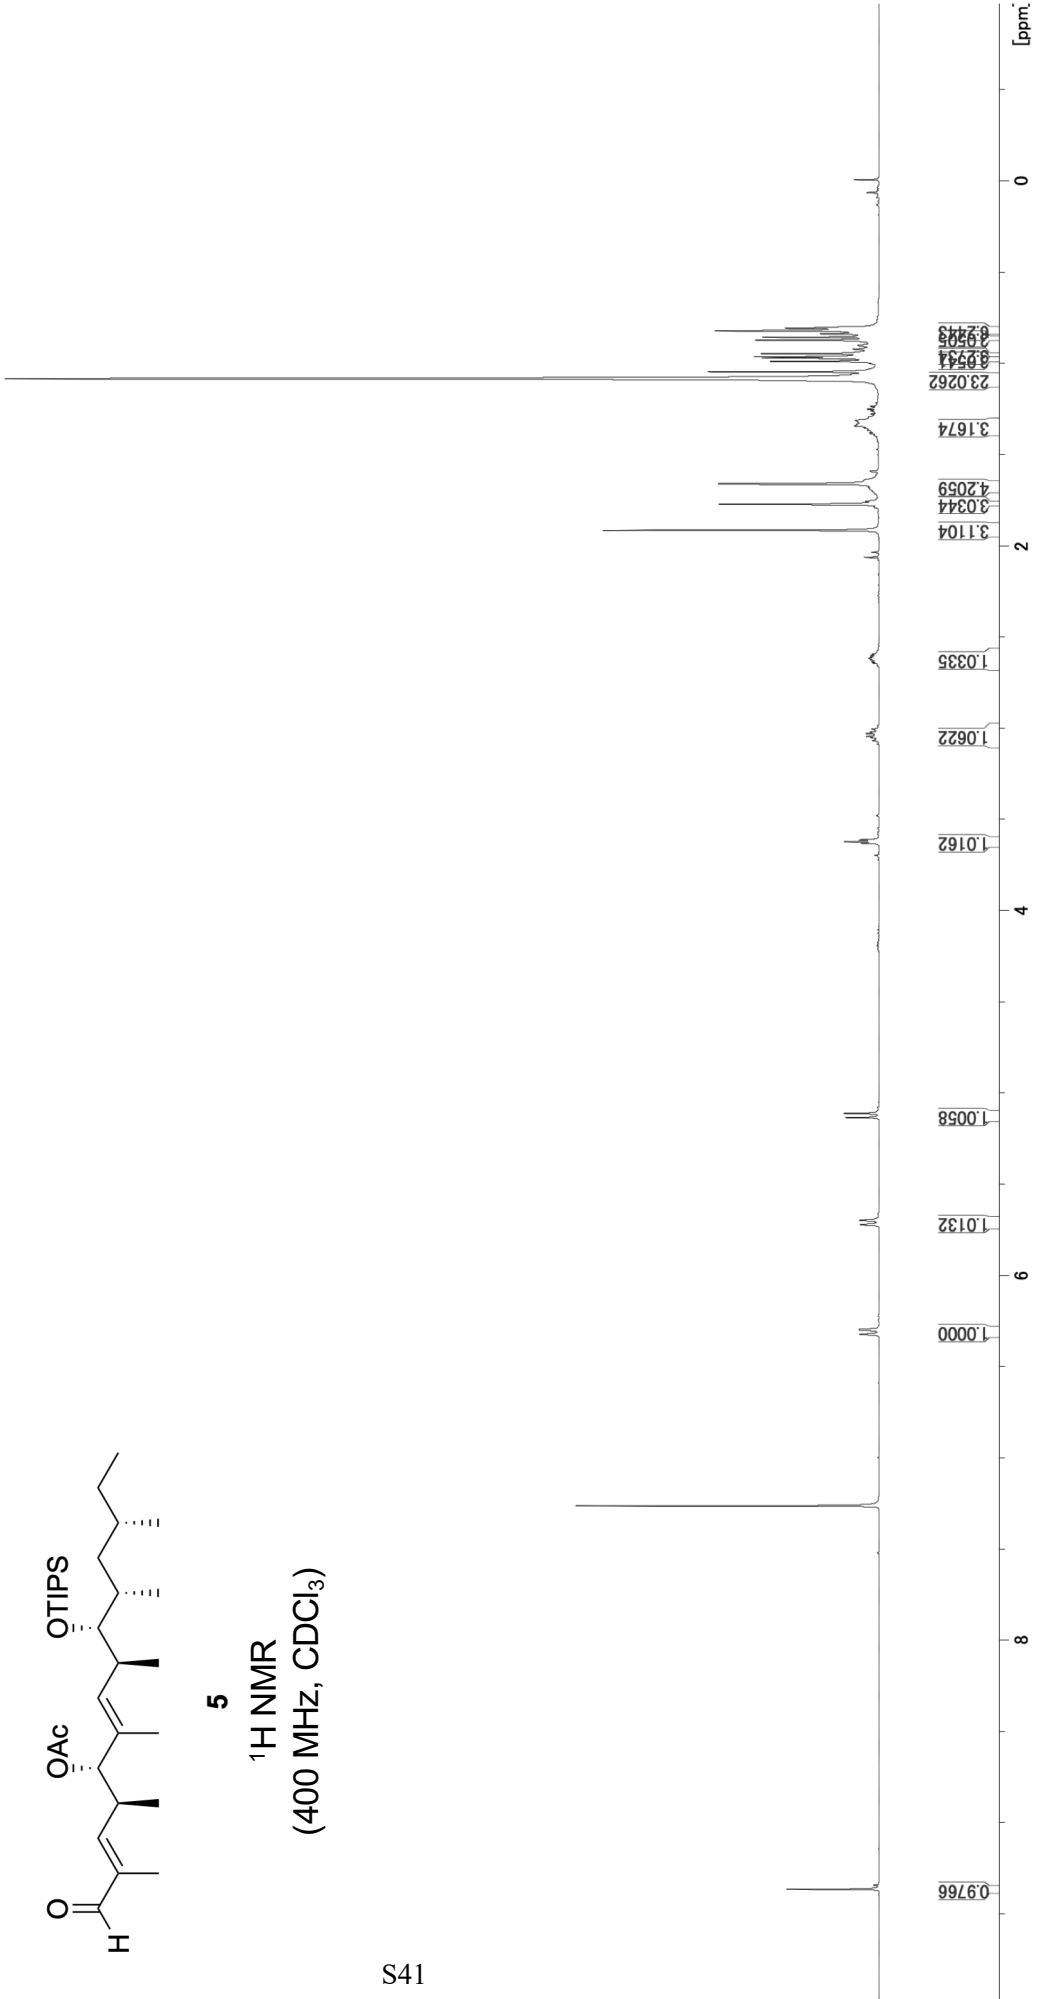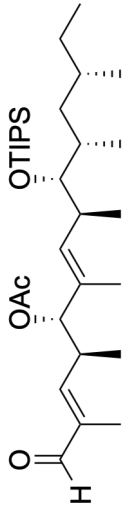

**5**  
<sup>1</sup>H NMR  
 (400 MHz, CDCl<sub>3</sub>)

41.1511  
36.5649  
36.4820  
35.4496  
32.0828  
28.4125  
21.0167  
20.2638  
18.7493  
18.6236  
18.5983  
18.5381  
17.8394  
16.3761  
16.1592  
13.7004  
12.4385  
12.3113  
11.4256  
9.4841

82.1869  
80.5467  
77.3655

129.5472  
134.8750  
139.7366

156.0901  
169.7647  
195.4185

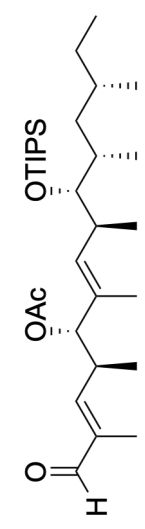

**5**  
<sup>13</sup>C NMR  
(100 MHz, CDCl<sub>3</sub>)

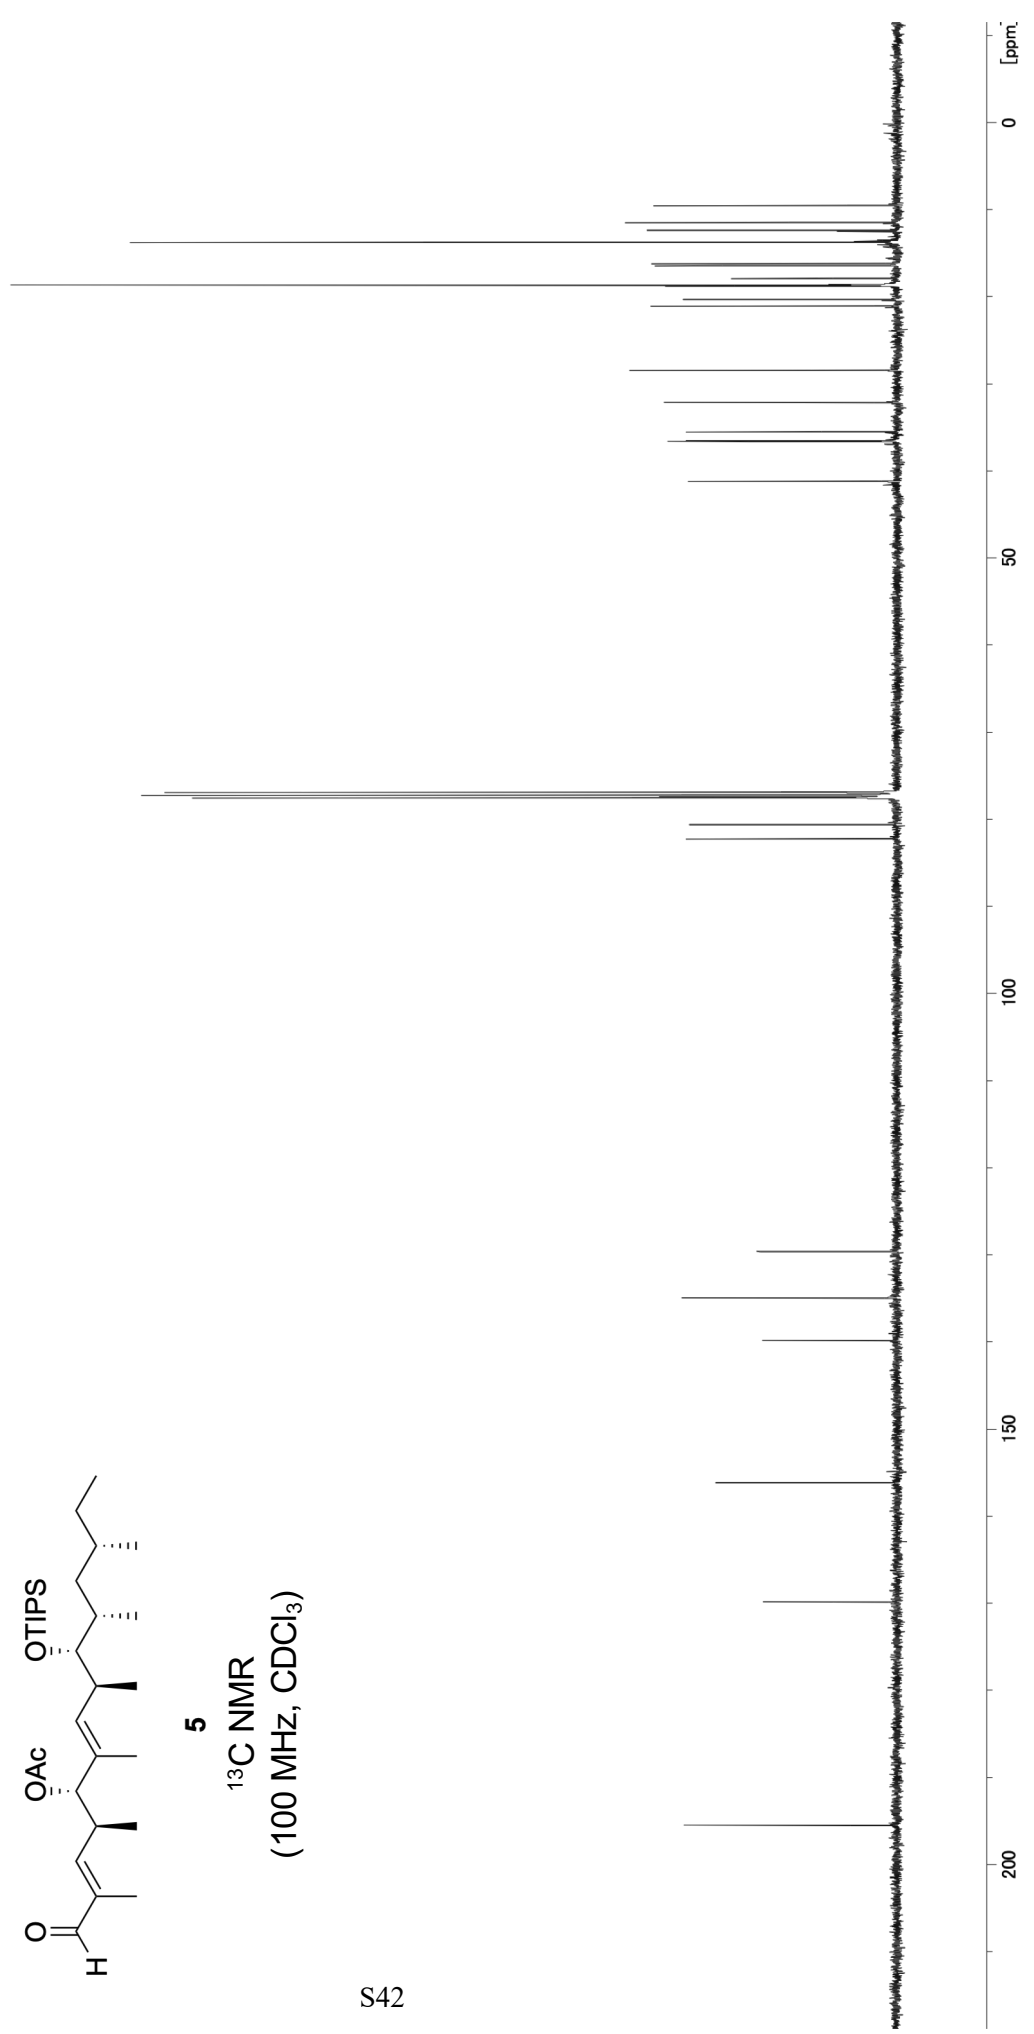

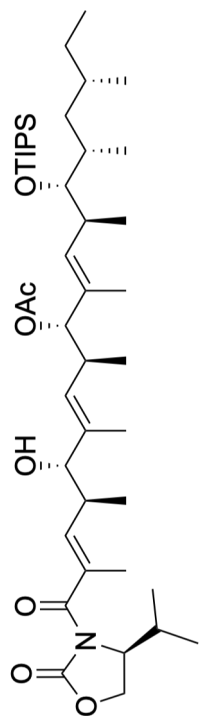

**19**  
<sup>1</sup>H NMR  
 (400 MHz, CDCl<sub>3</sub>)

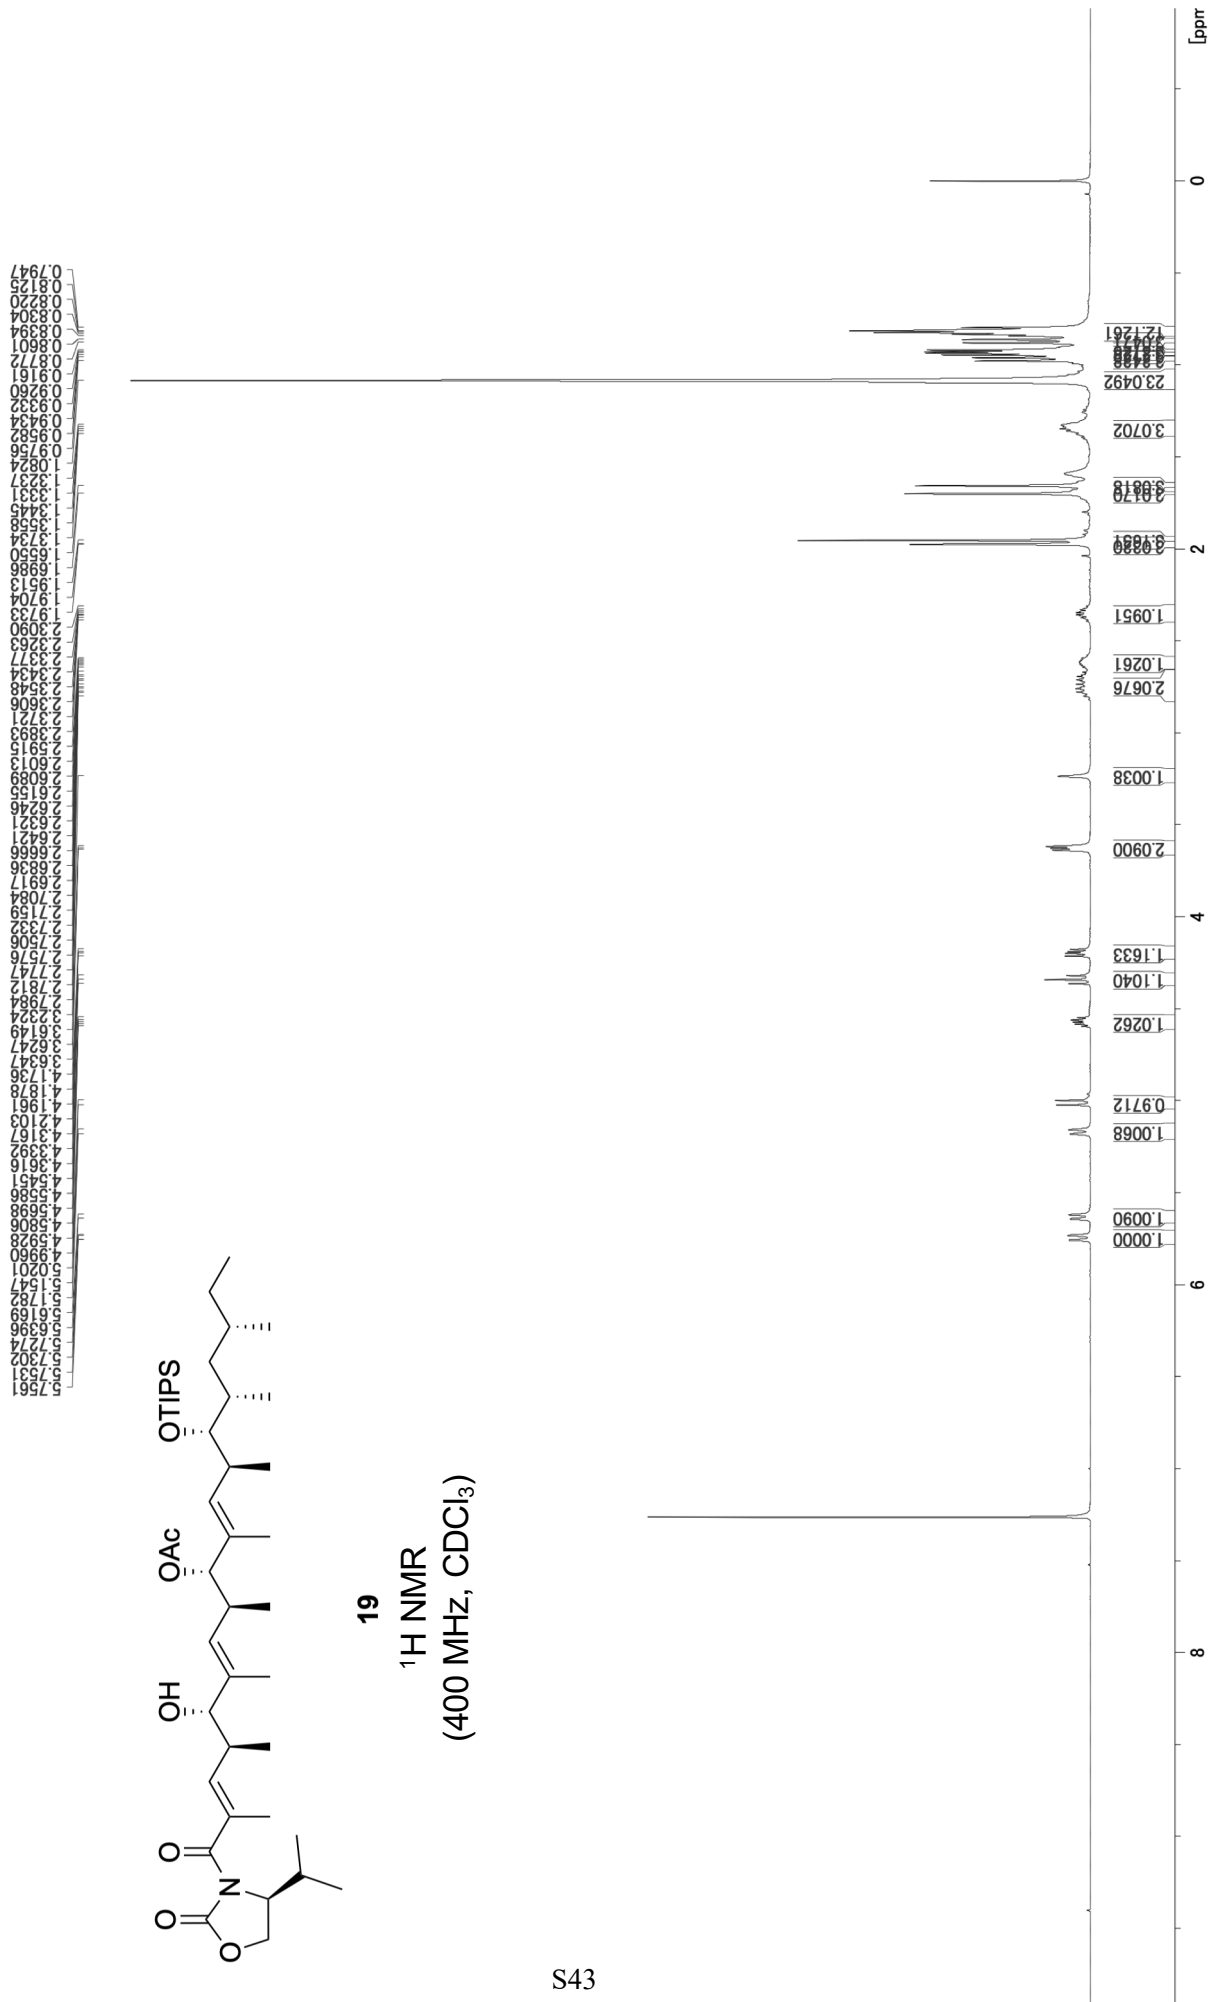

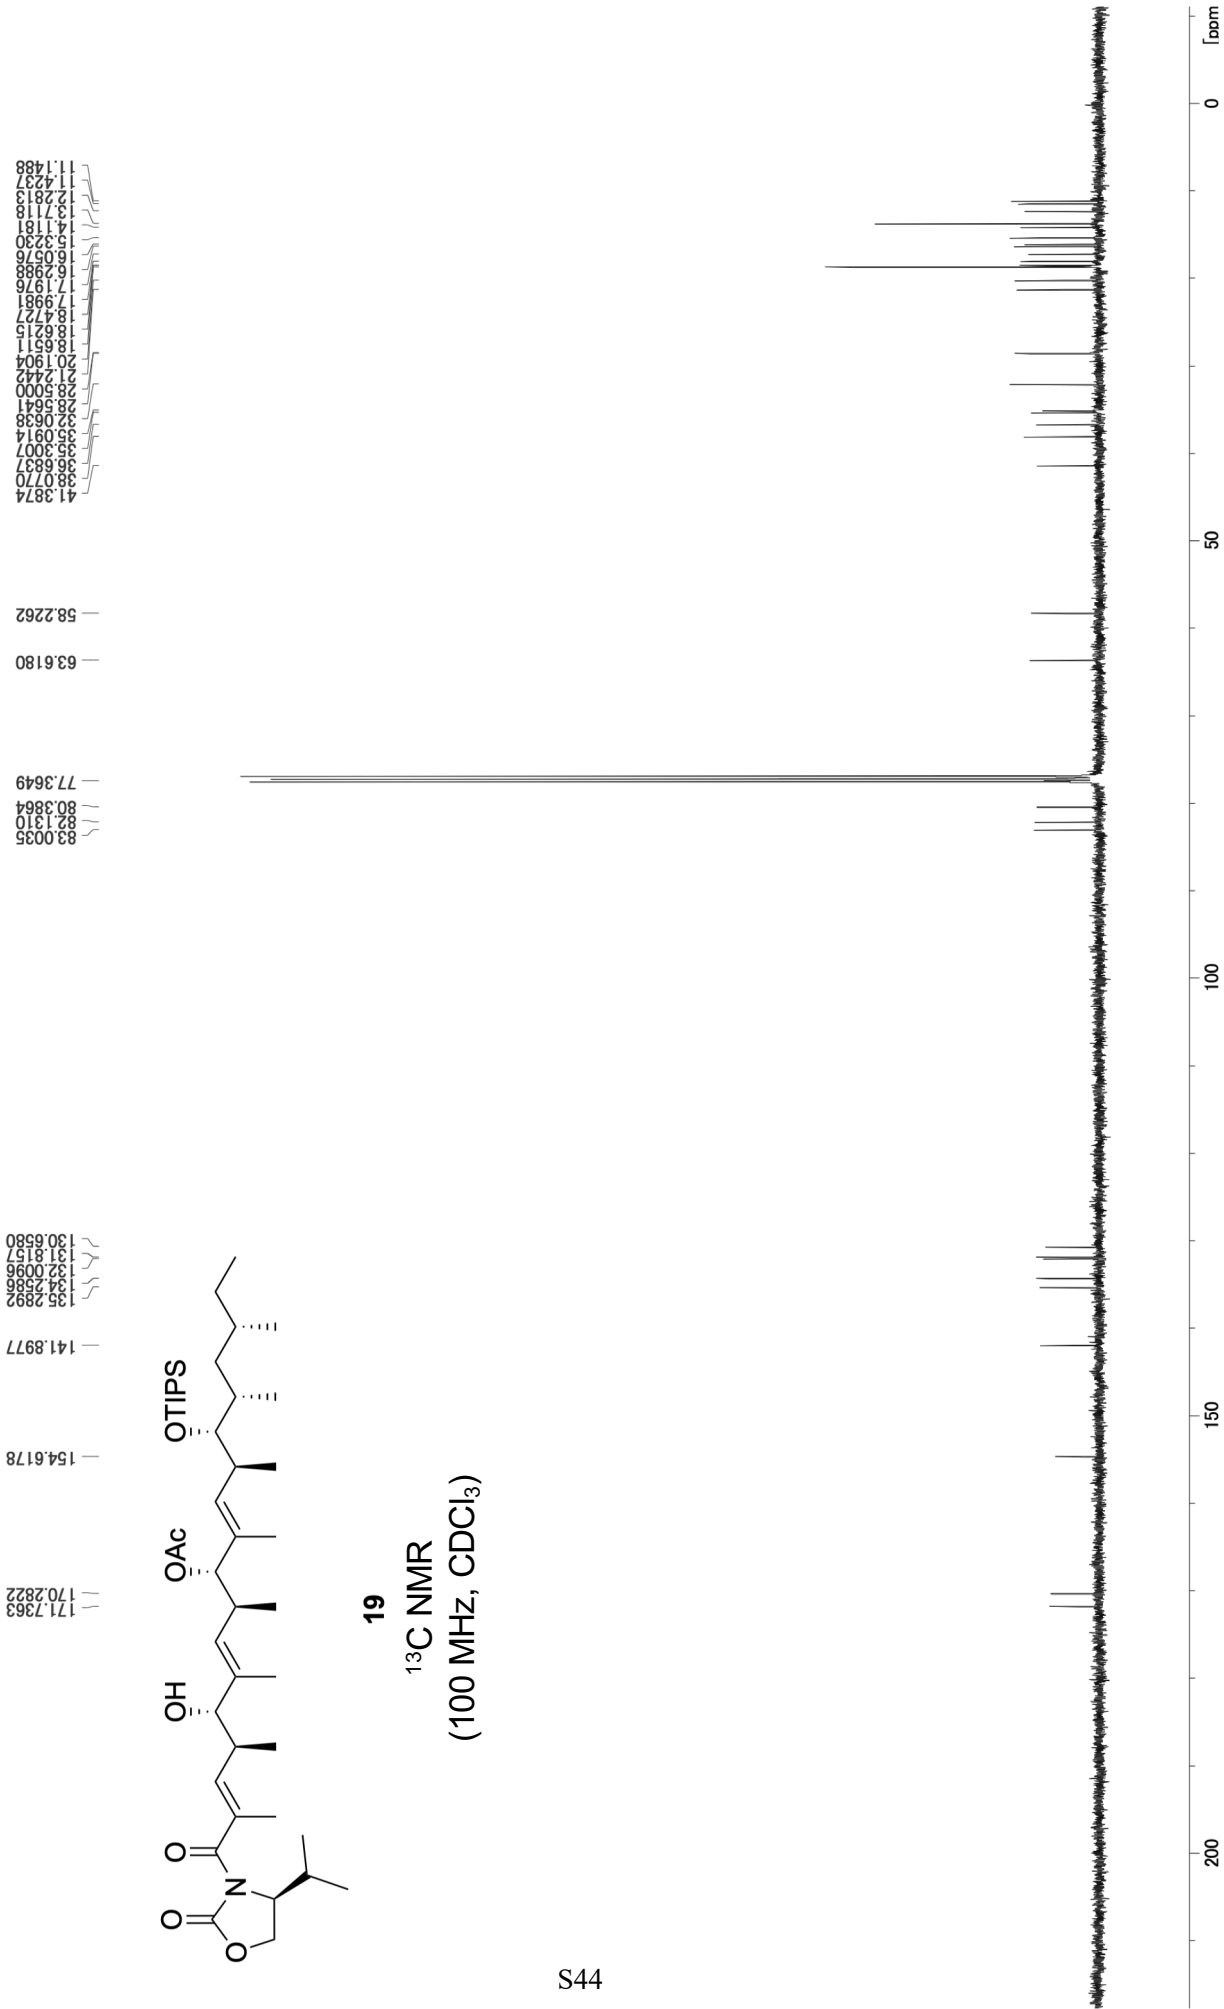

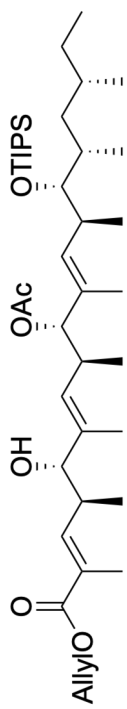

20  
<sup>1</sup>H NMR  
 (400 MHz, CDCl<sub>3</sub>)

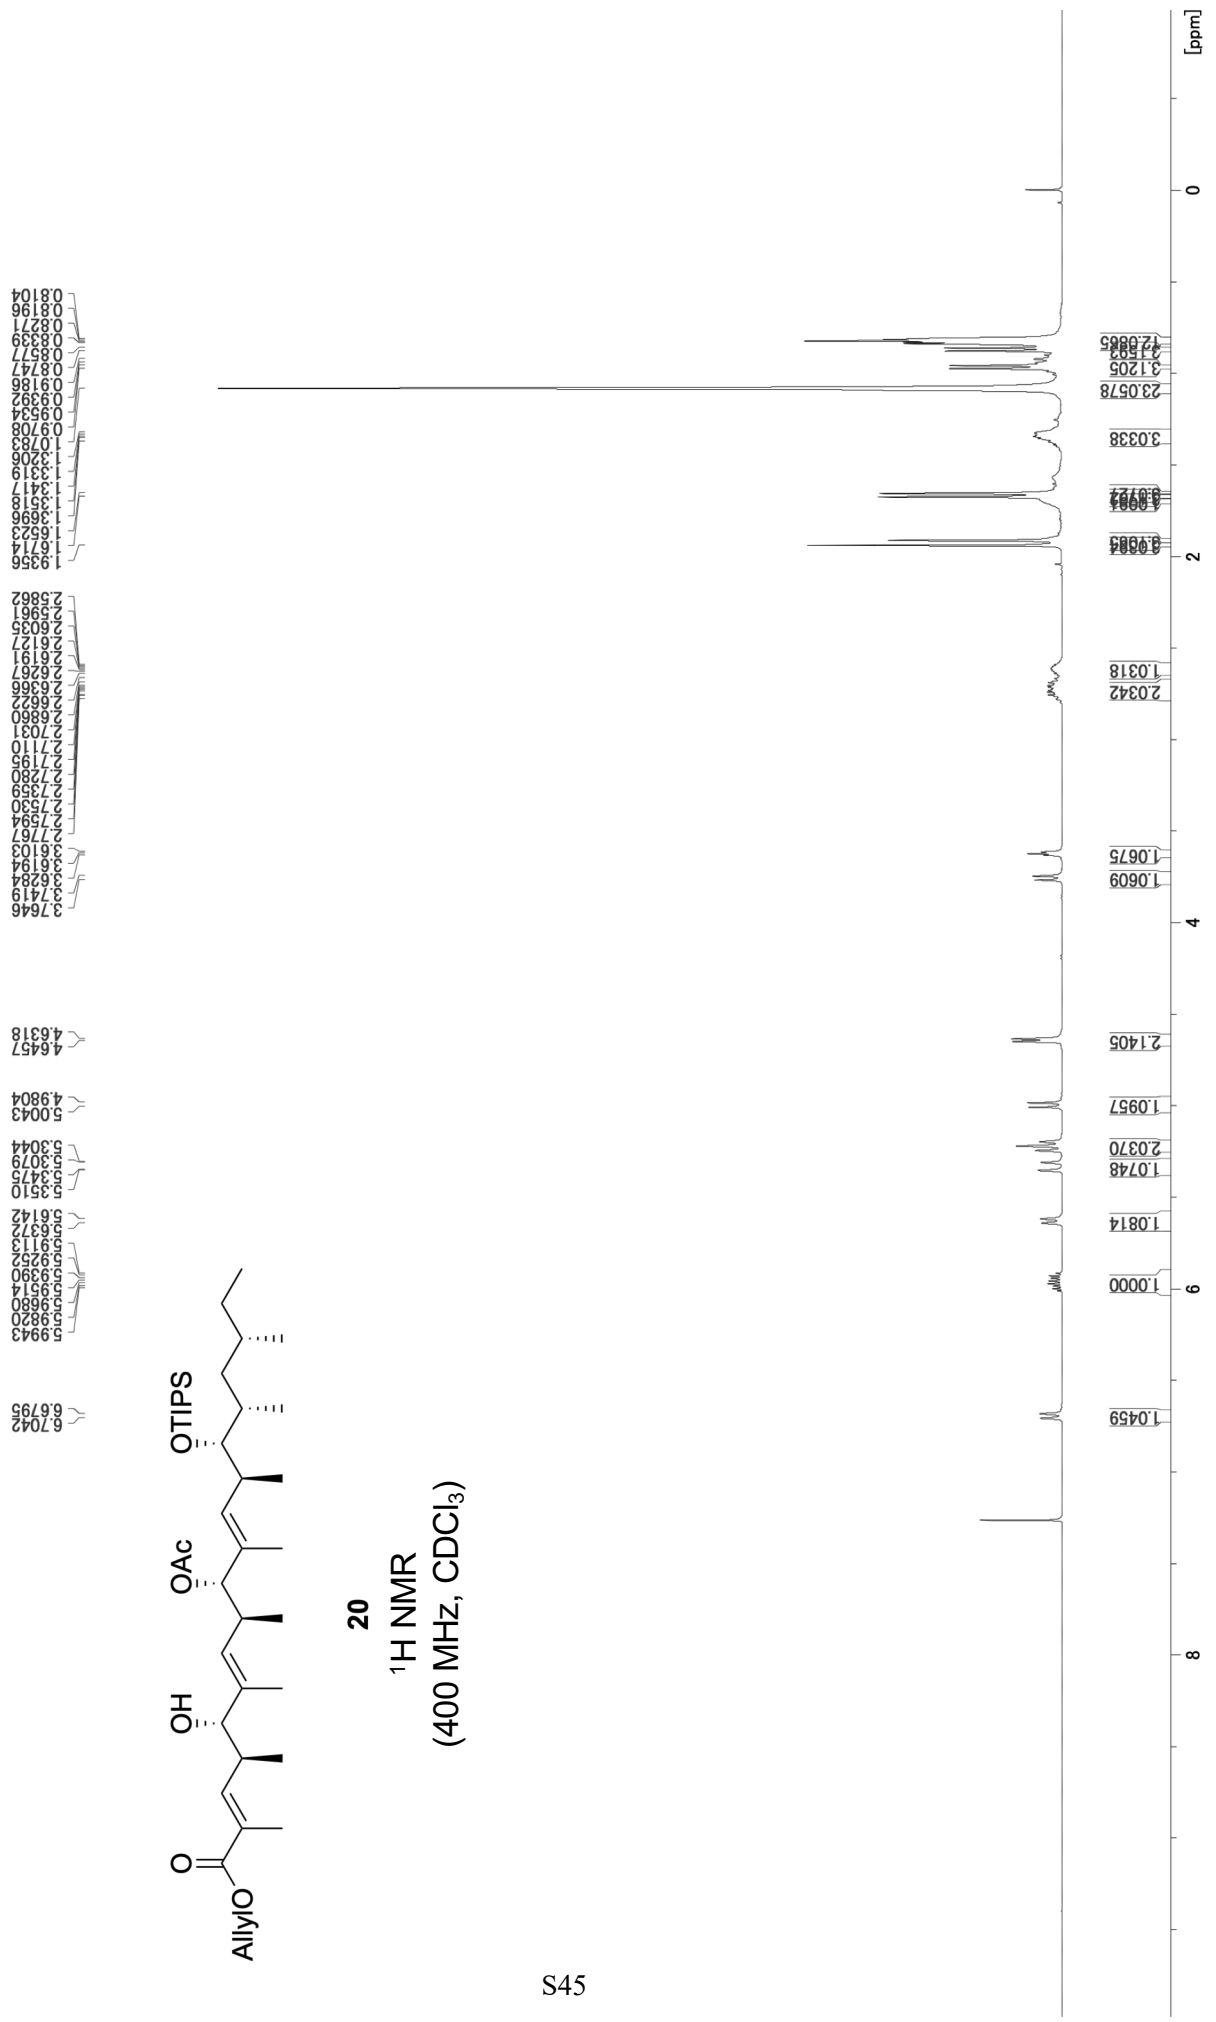

41.3128  
37.2413  
36.6229  
35.2339  
35.1395  
32.0684  
28.4961  
21.2574  
20.2029  
18.6429  
18.6173  
18.5210  
17.1389  
16.5127  
16.0143  
13.7221  
12.9644  
12.1790  
11.4173  
11.1697

83.3165  
82.4642  
80.4596  
77.3668  
65.3951

118.0032  
135.9669  
134.5607  
132.6798  
132.5557  
130.3134  
128.7225

170.2291  
167.8098

145.3764



**20**  
**<sup>13</sup>C NMR**  
**(100 MHz, CDCl<sub>3</sub>)**

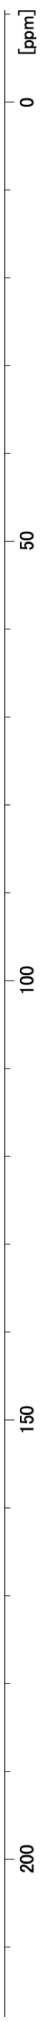

0.8100  
 0.8218  
 0.8399  
 0.8586  
 0.8756  
 0.9539  
 0.9713  
 1.0756  
 1.3217  
 1.3336  
 1.3423  
 1.3530  
 1.3690  
 1.6554  
 1.6729  
 1.8905  
 1.9460  
 2.5876  
 2.5976  
 2.6049  
 2.6142  
 2.6205  
 2.6281  
 2.6380  
 2.6567  
 2.6753  
 2.6983  
 2.7150  
 2.7380  
 2.7548  
 2.7794  
 3.6119  
 3.6209  
 3.6298  
 3.7624  
 3.7849  
 4.9885  
 5.0124  
 5.2174  
 5.2174  
 5.6159  
 5.6389  
 6.8043  
 6.7799

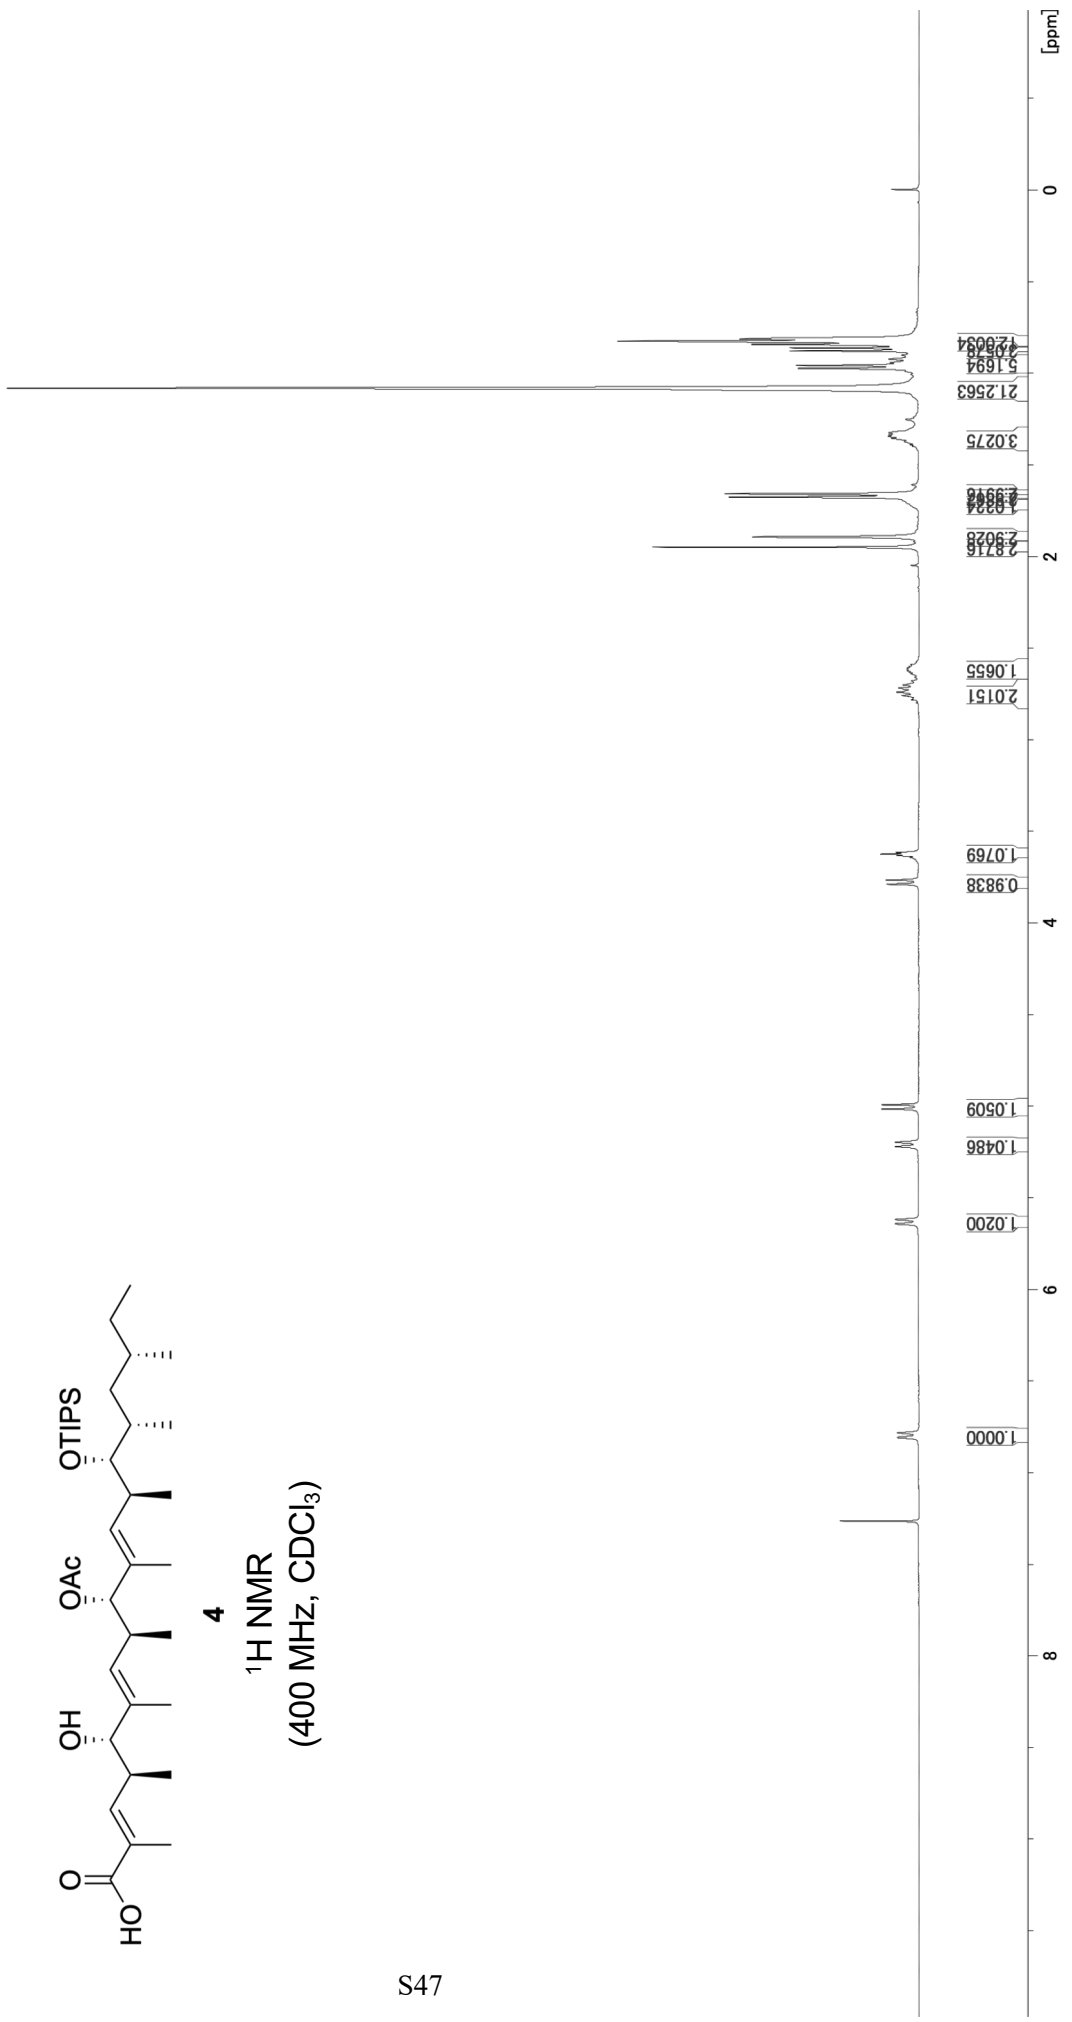



41.3263  
37.3318  
36.6447  
35.2327  
35.1166  
32.0659  
28.5070  
27.2644  
20.1963  
18.6430  
18.5015  
17.1403  
16.4051  
15.9964  
13.7241  
12.6012  
12.1515  
11.4149  
11.1823

83.4447  
82.3886  
80.4502  
77.3667

136.0442  
134.6503  
132.4632  
130.2969  
128.1359

147.5145

172.9387  
170.5280

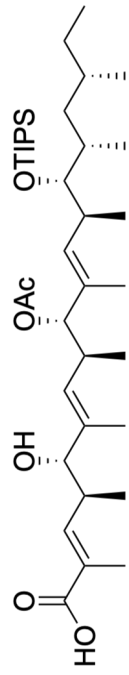

4

<sup>13</sup>C NMR  
(100 MHz, CDCl<sub>3</sub>)

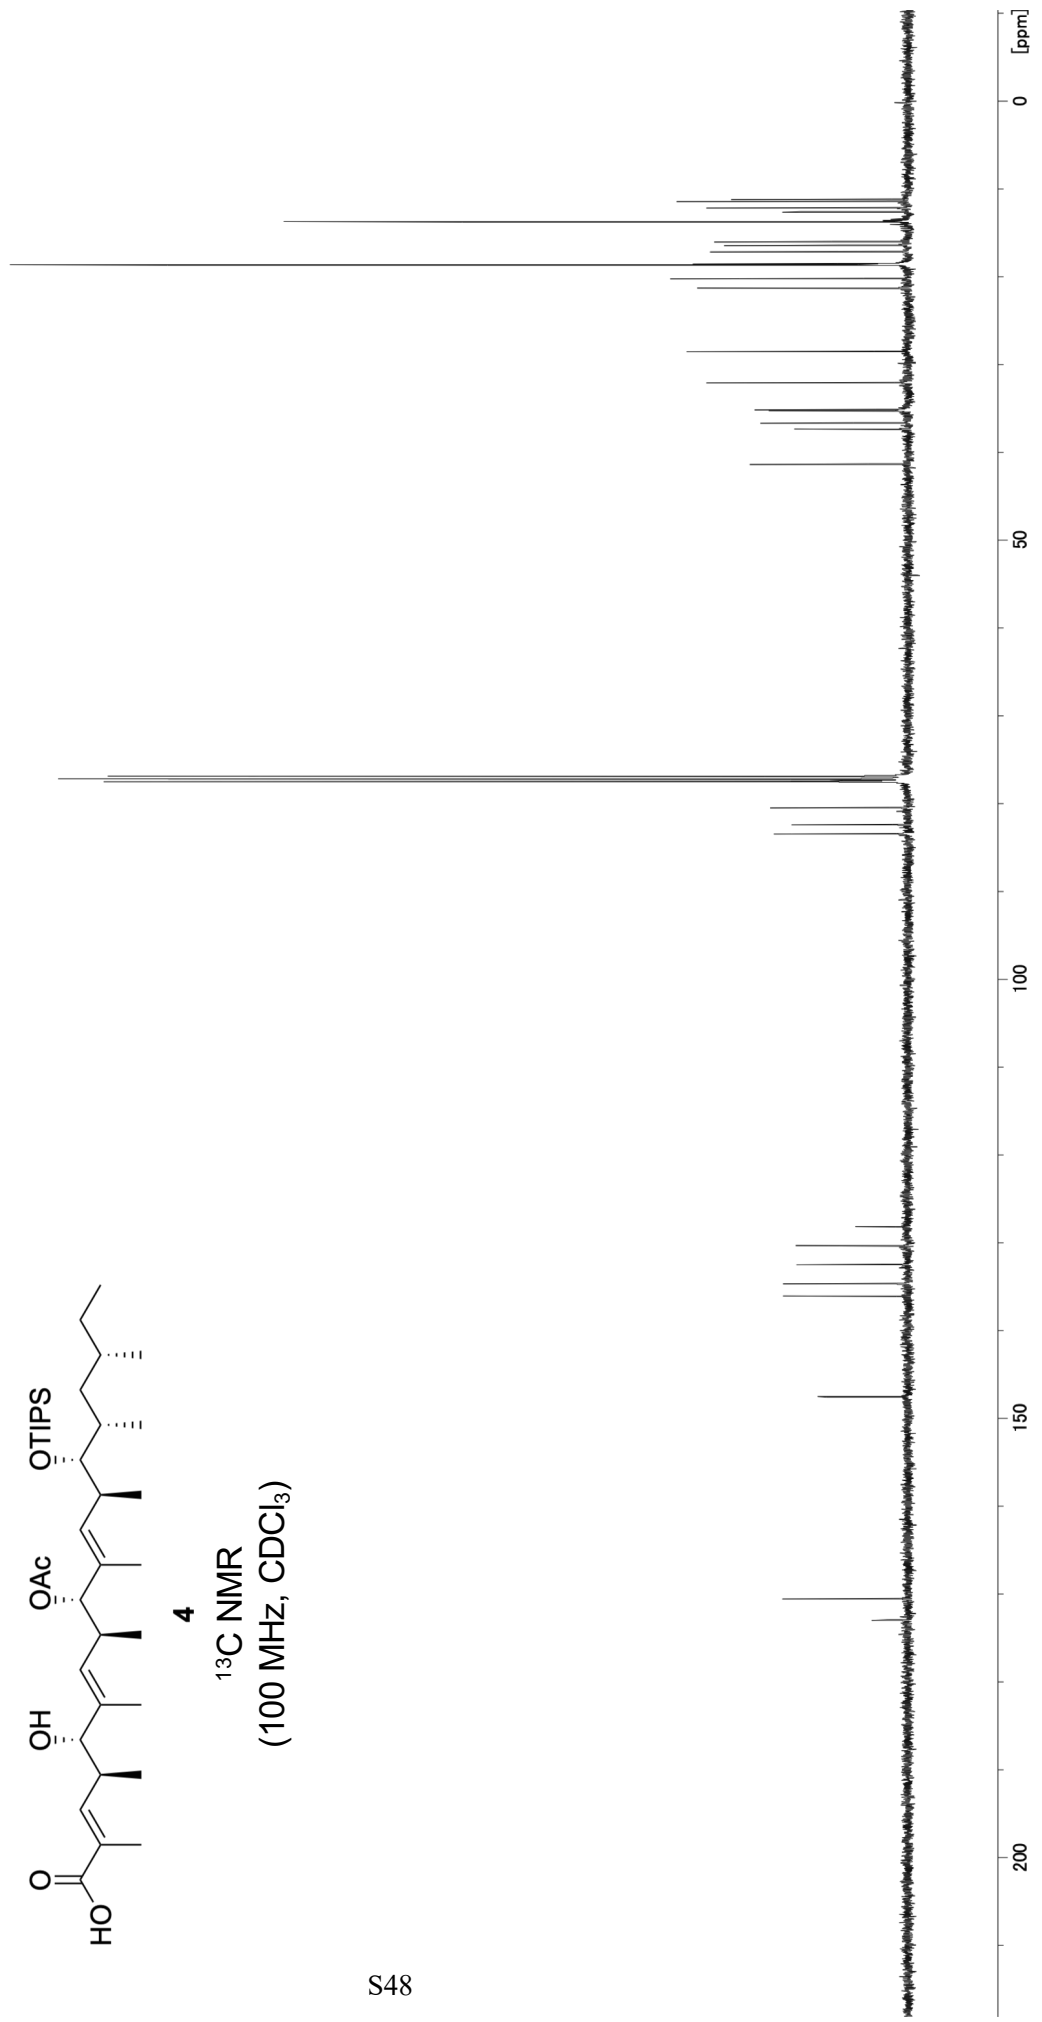

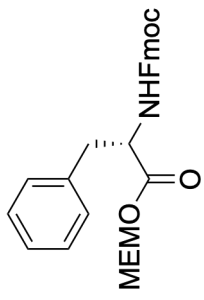

S5

<sup>1</sup>H NMR  
(400 MHz, CDCl<sub>3</sub>)

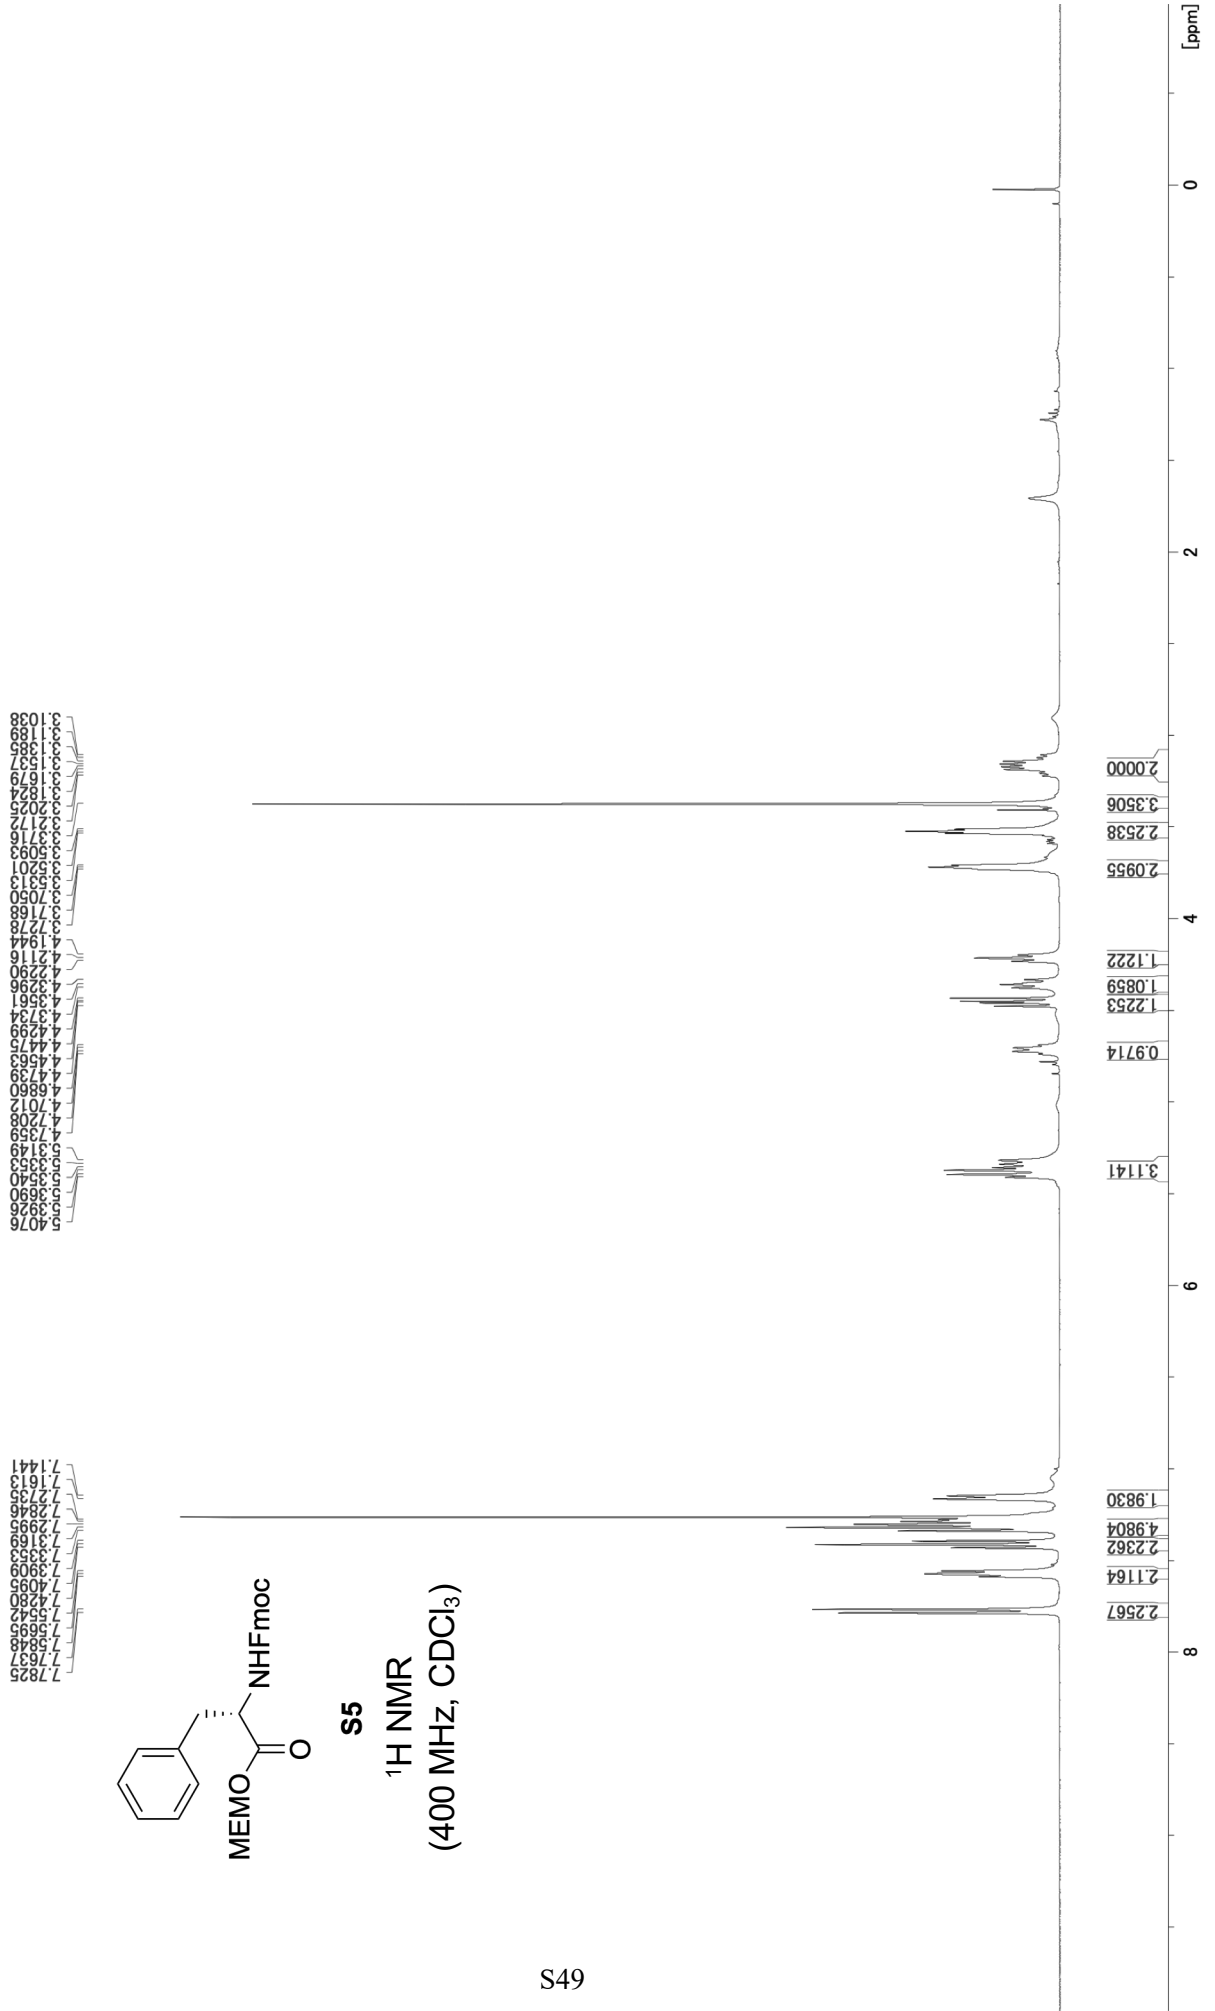



**S5**  
<sup>13</sup>C NMR  
(100 MHz, CDCl<sub>3</sub>)

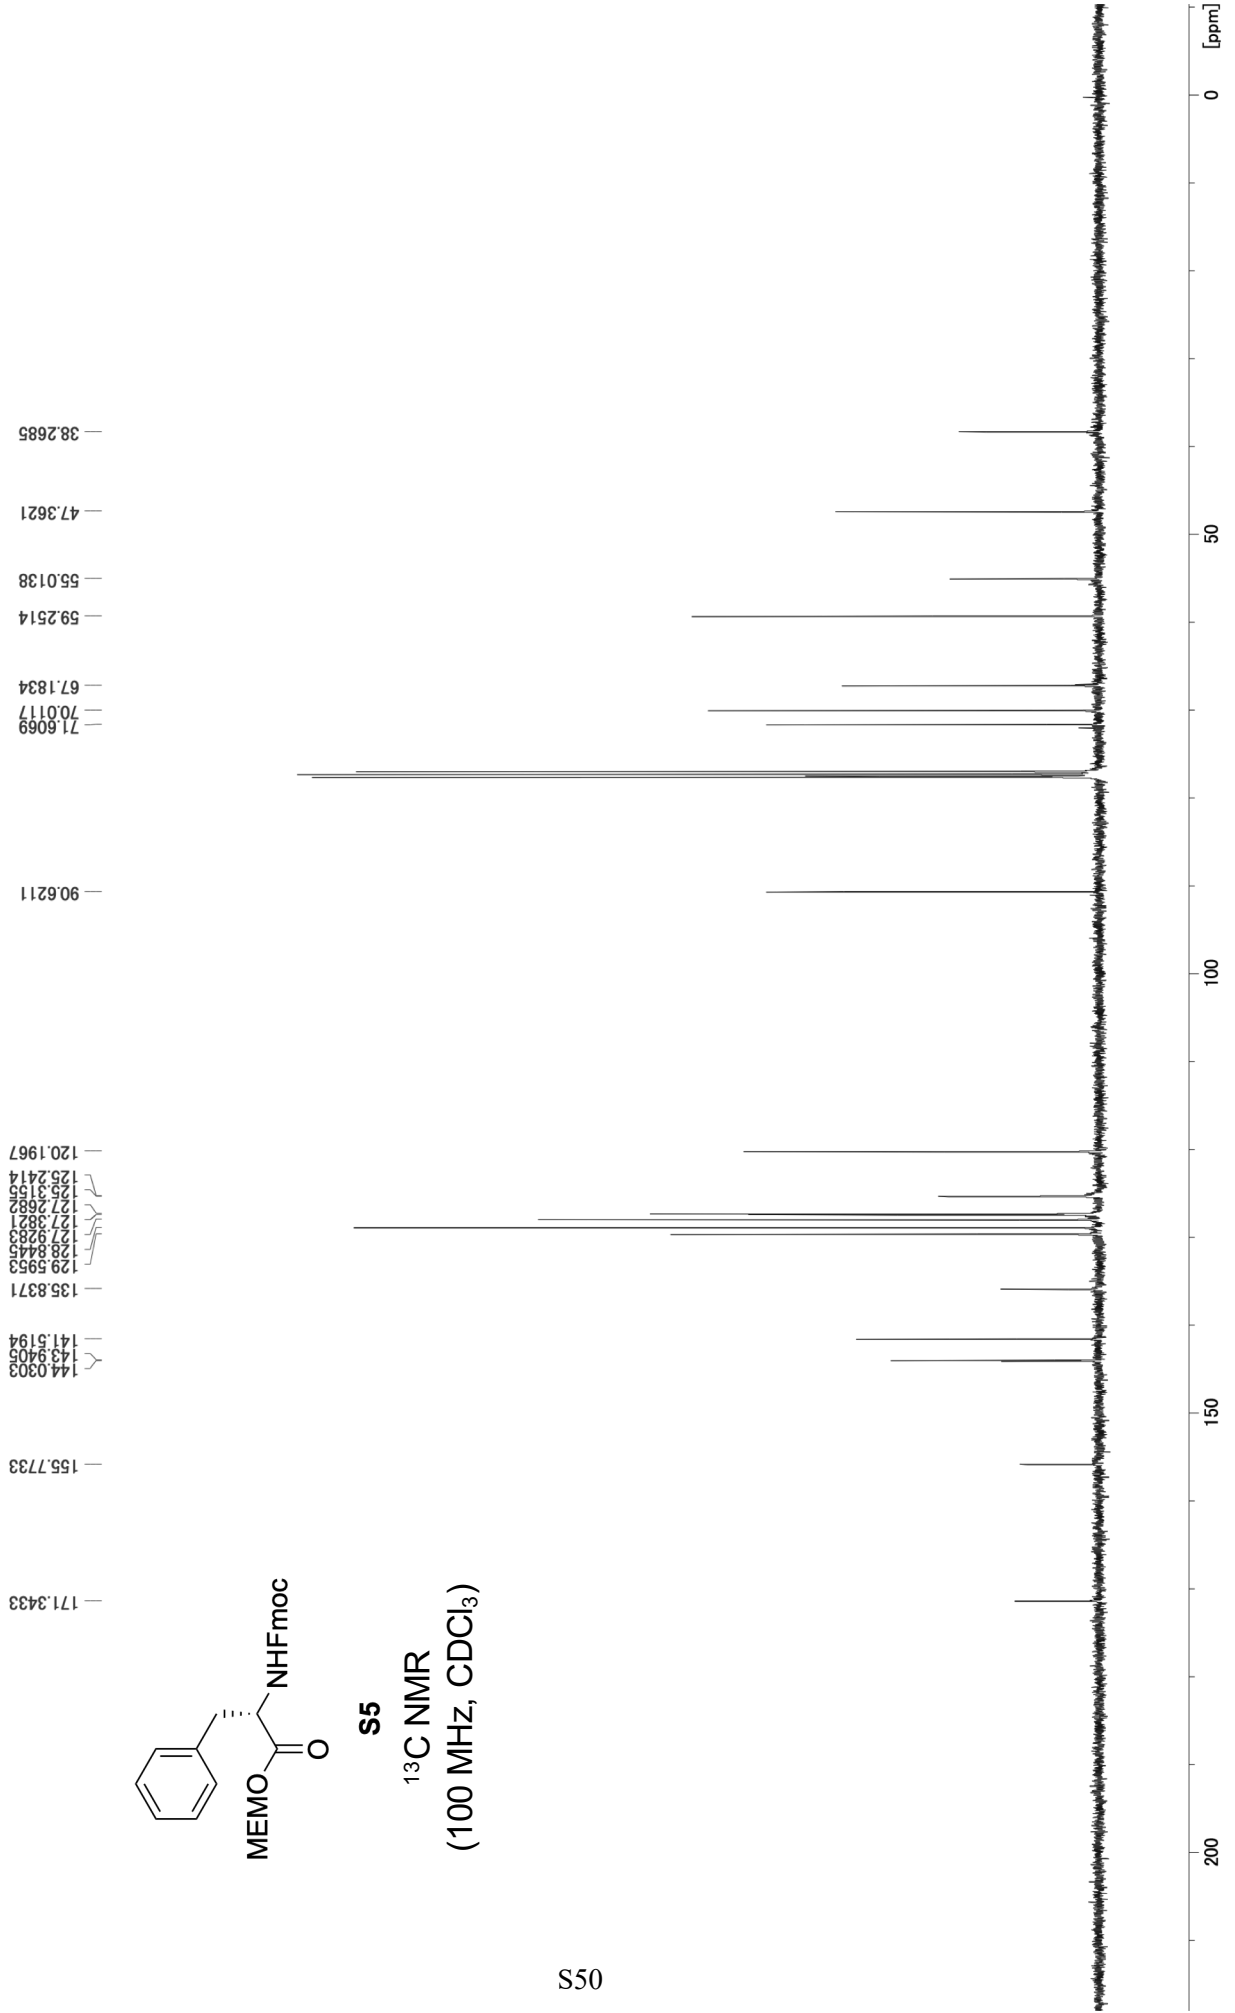



41.2909  
37.7729  
36.8753  
36.6091  
35.1976  
35.0917  
32.0423  
28.4854  
21.2204  
20.1789  
18.6232  
18.3980  
17.4819  
16.8212  
15.9562  
13.7034  
13.136  
12.1012  
11.3953  
11.3004

53.5272  
59.1791  
69.8523  
71.5400  
77.3638  
80.4429  
82.2773  
83.3616  
90.4592

127.2697  
128.7138  
129.5015  
130.2893  
131.4767  
132.1764  
134.6588  
135.9837  
136.0942  
139.8451

171.5633  
170.3027  
168.8742

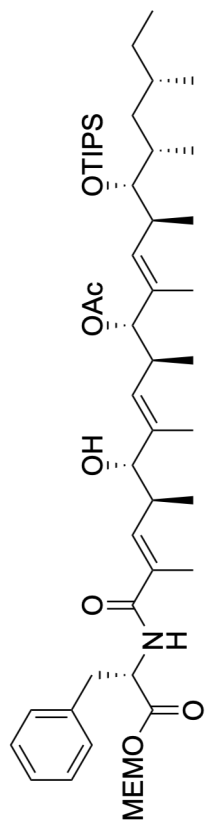

**21**  
**<sup>13</sup>C NMR**  
**(100 MHz, CDCl<sub>3</sub>)**

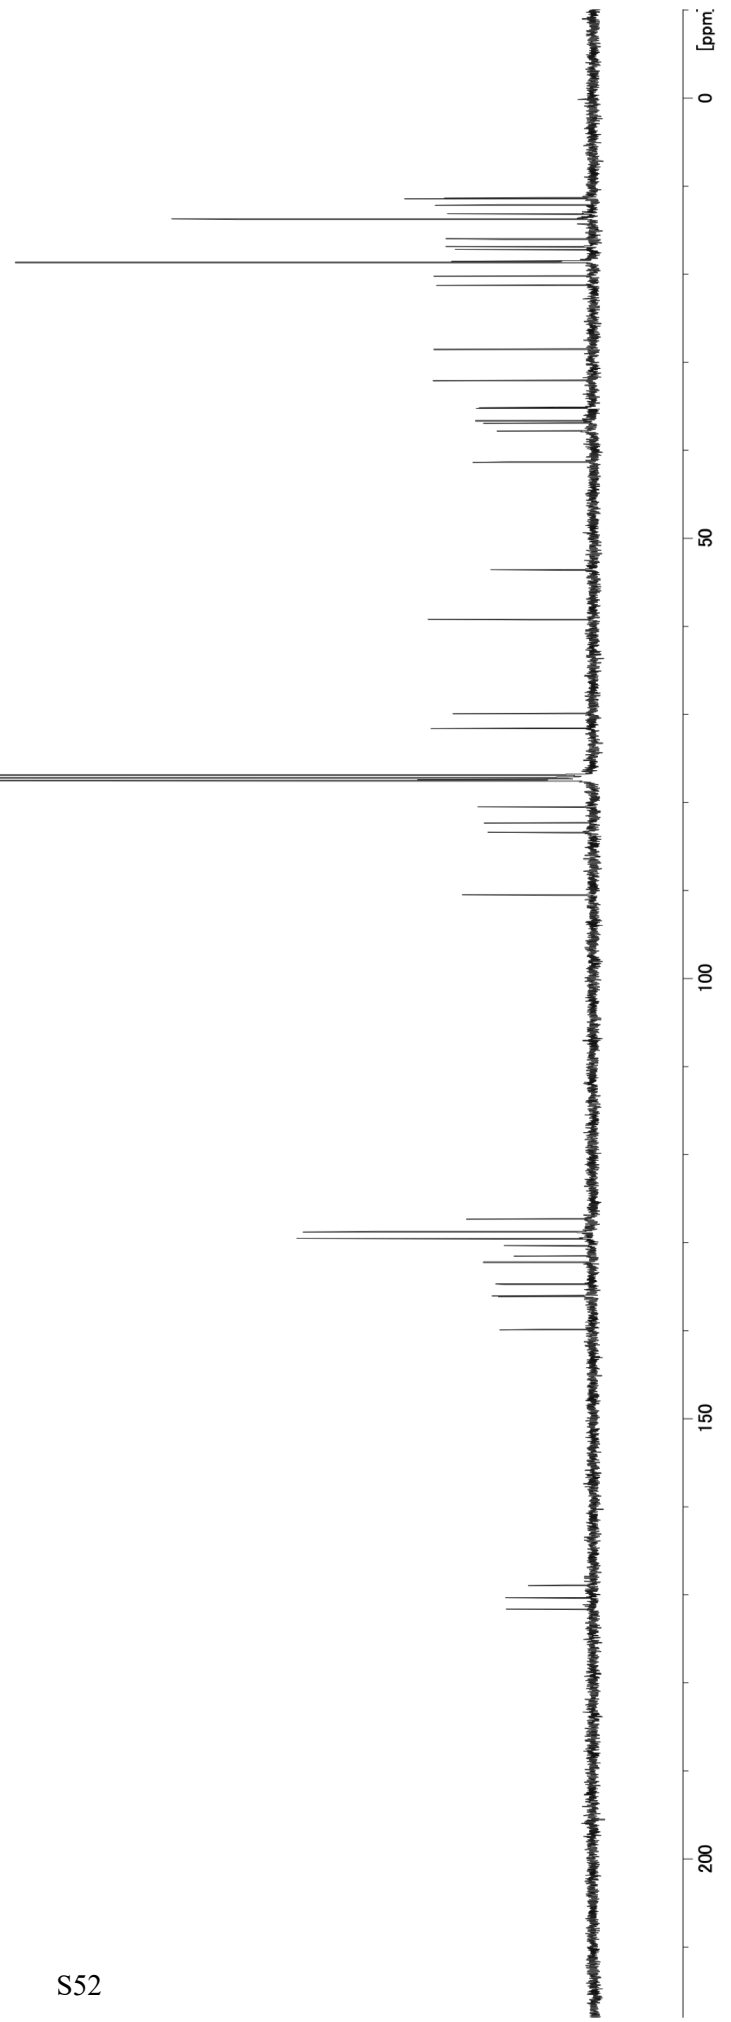



41.2301  
37.8267  
36.5585  
35.5820  
35.3070  
35.1867  
32.0604  
28.4499  
20.9796  
20.1974  
18.6300  
18.5336  
18.5028  
16.9586  
16.5036  
16.0055  
13.7007  
13.0883  
12.0950  
12.0439  
11.4150

90.3689  
86.9438  
82.8338  
80.4564  
77.3668  
71.5486  
69.8138  
68.4751  
59.1772  
53.6180

171.4564  
169.8105  
169.5900  
154.6166  
118.8631  
127.2279  
128.7435  
129.4947  
130.2263  
131.7806  
131.9250  
132.2365  
134.6301  
134.7664  
136.1619  
137.3829

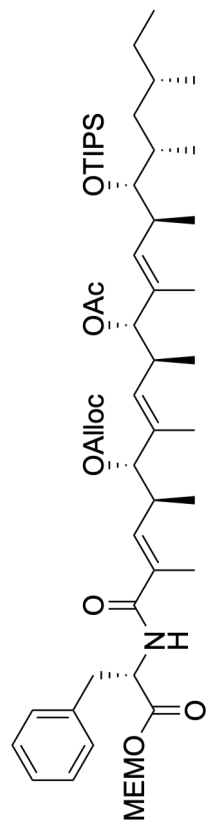

**22**  
<sup>13</sup>C NMR  
(100 MHz, CDCl<sub>3</sub>)

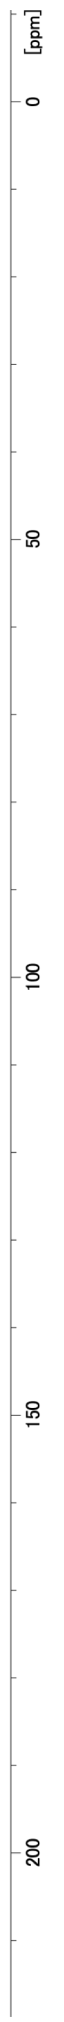

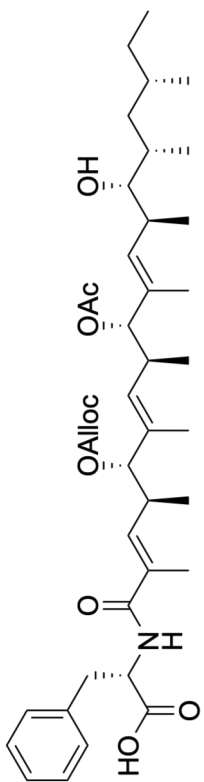

**2**  
<sup>1</sup>H NMR  
 (400 MHz, CDCl<sub>3</sub>)

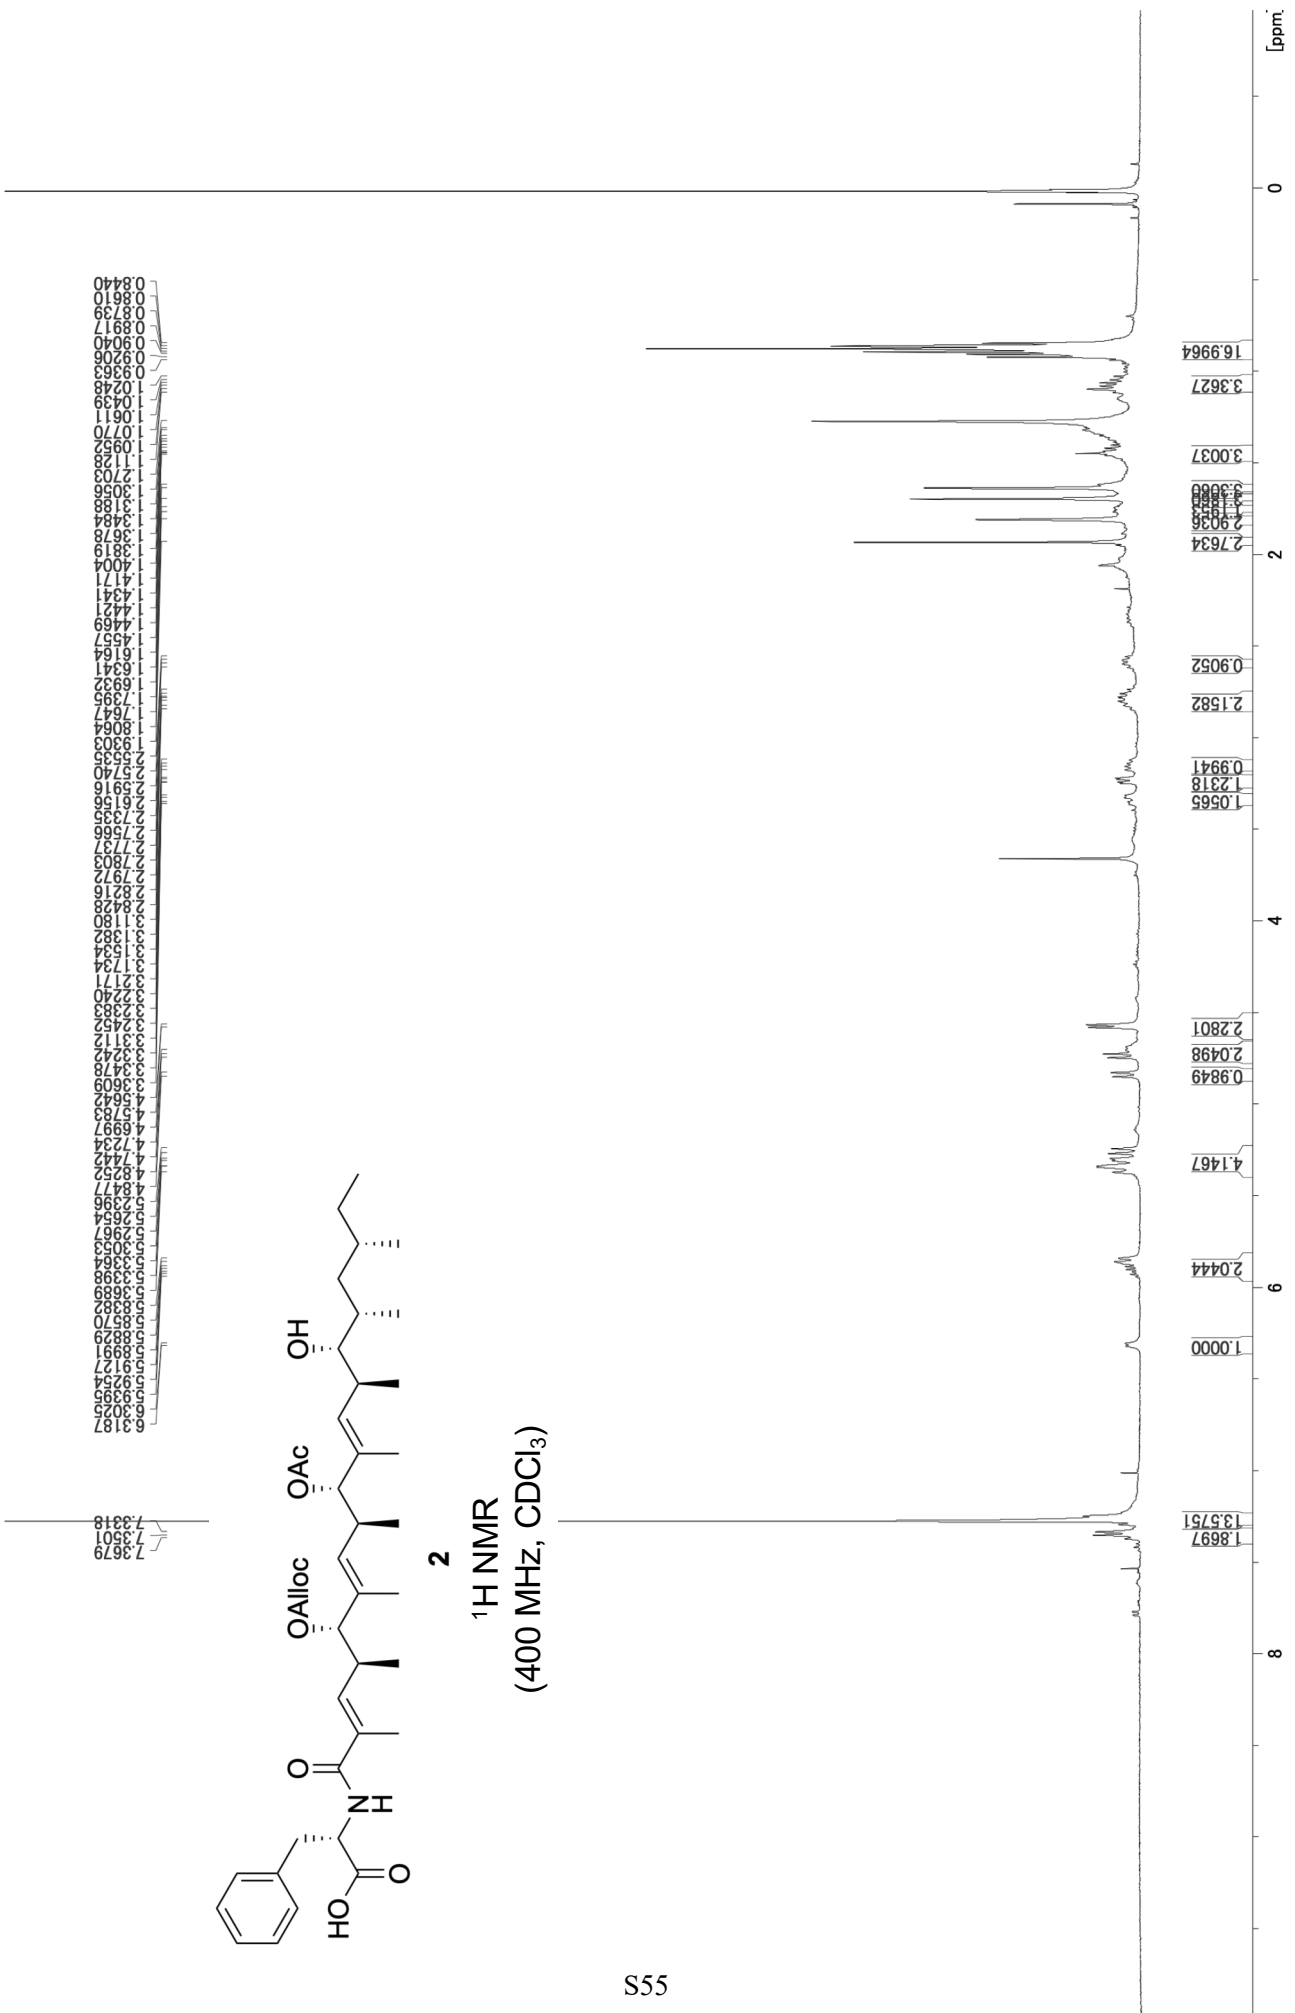



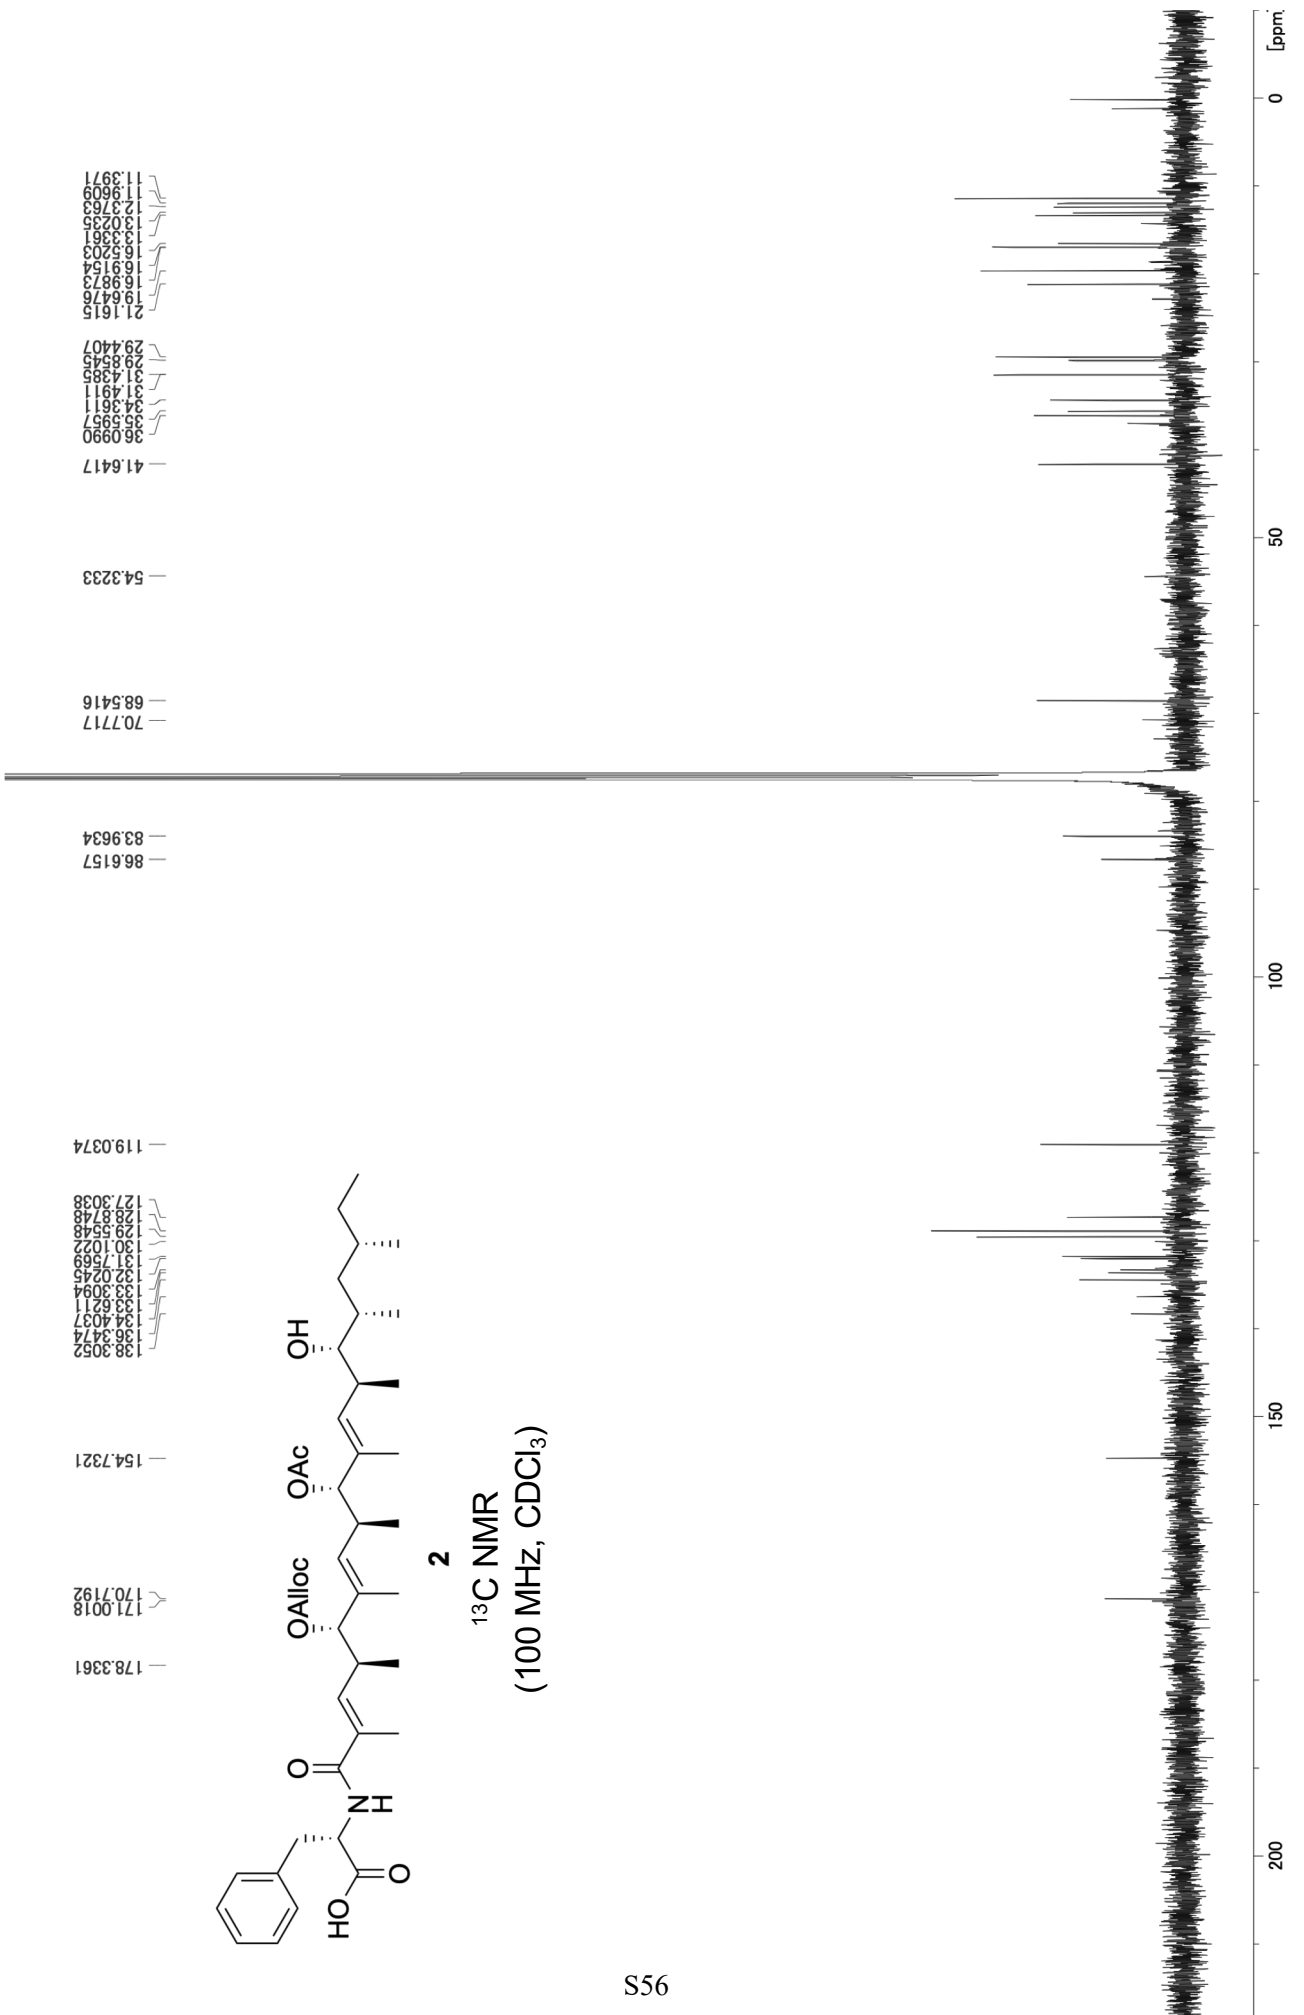

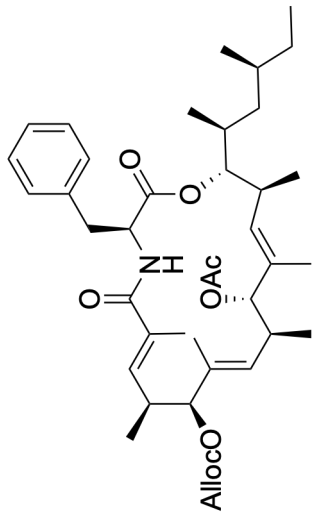

**23**

<sup>1</sup>H NMR  
(400 MHz, CDCl<sub>3</sub>)

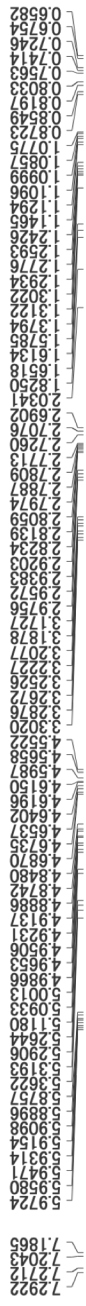





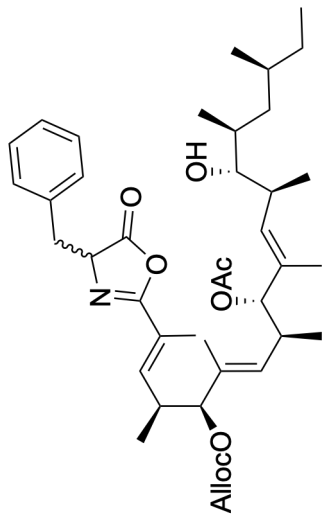

**24**  
<sup>13</sup>C NMR  
(100 MHz, CDCl<sub>3</sub>)

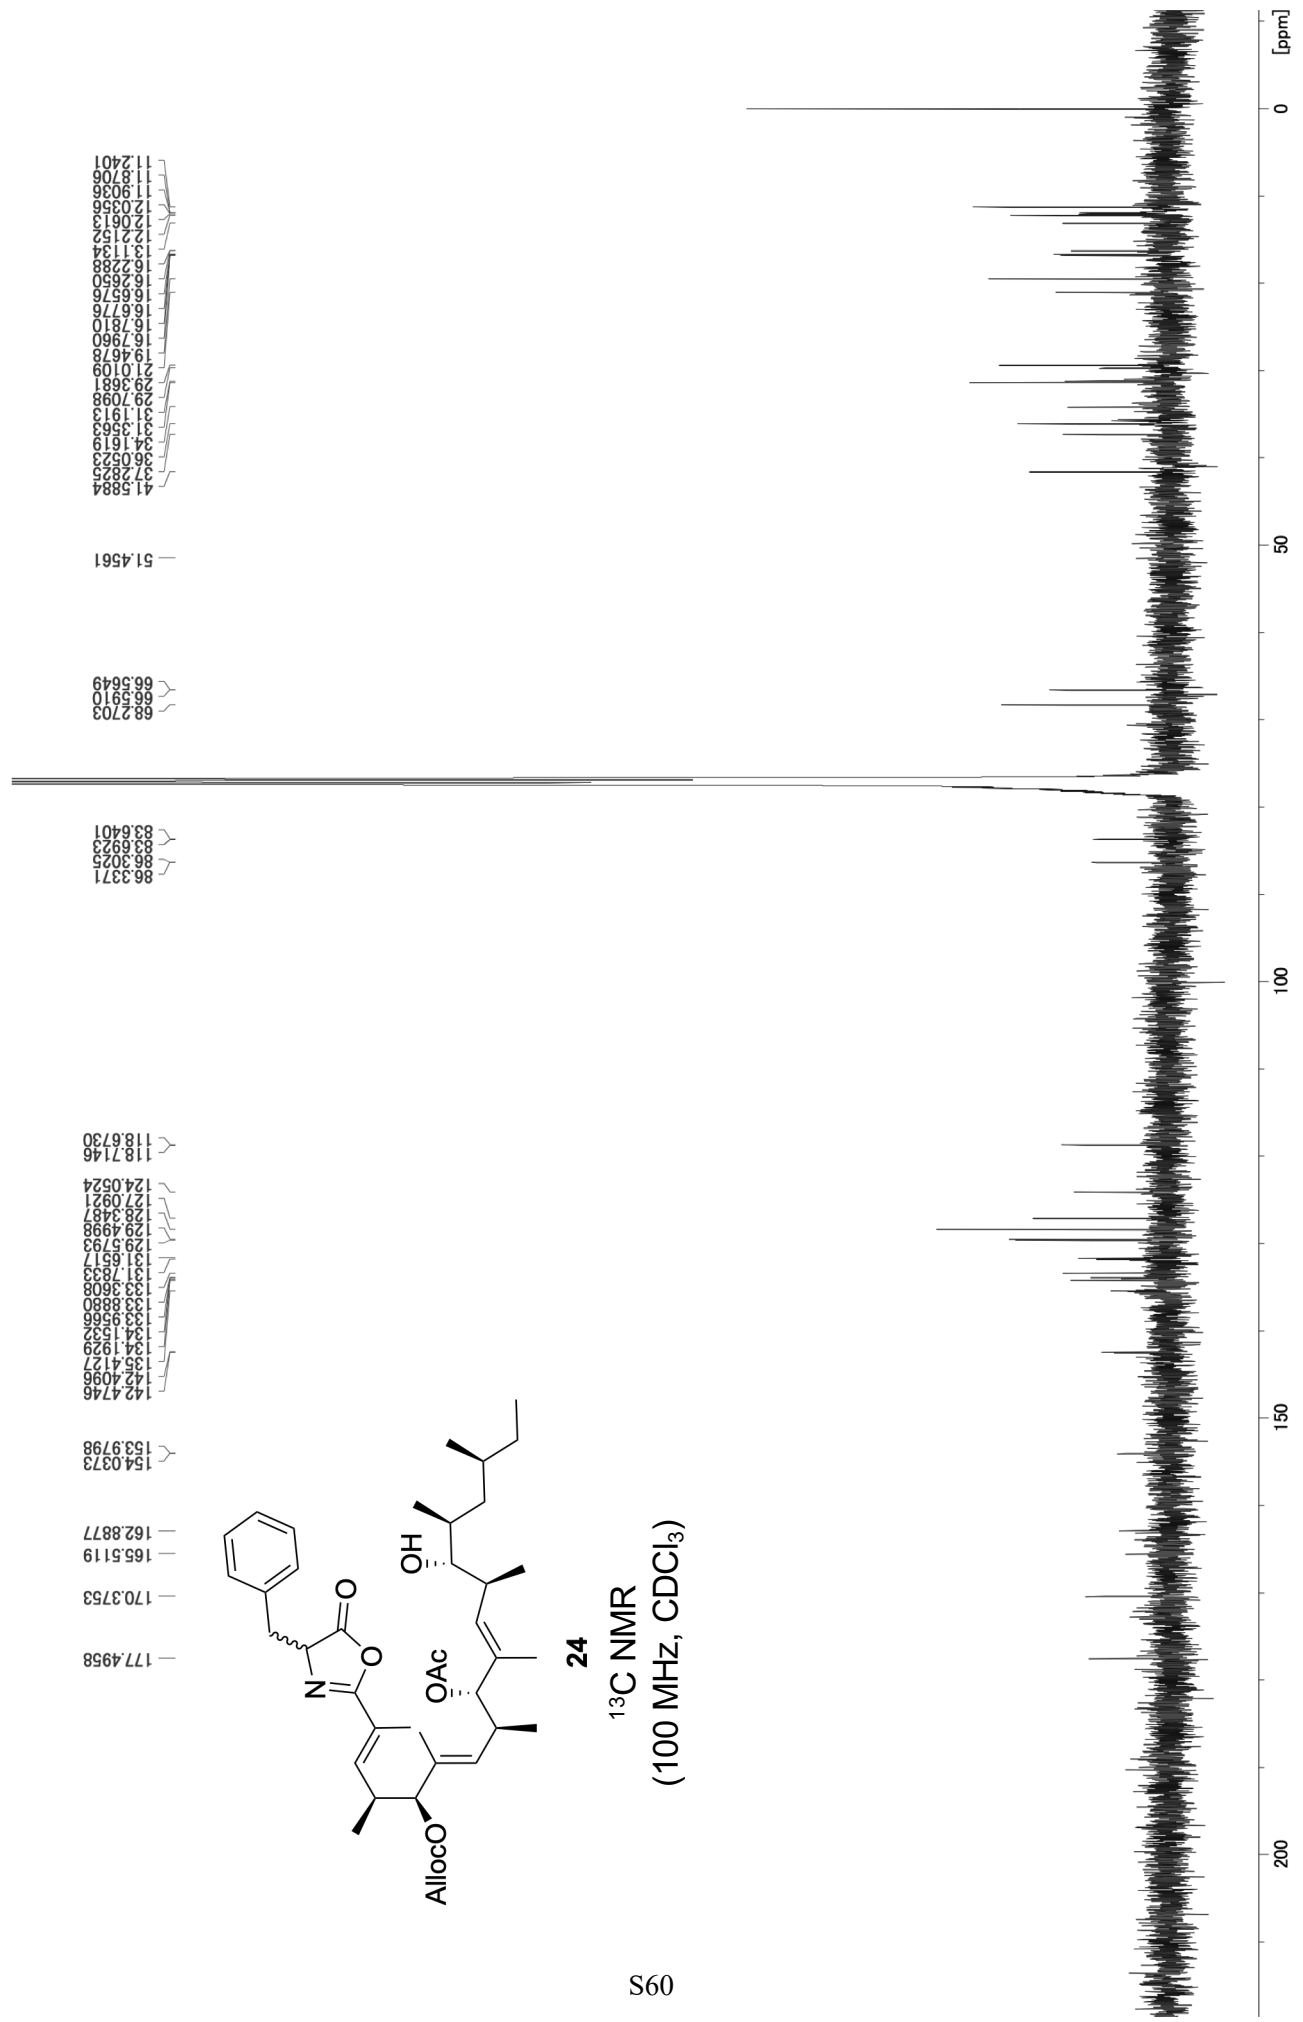



170.7525  
169.6593  
168.5469

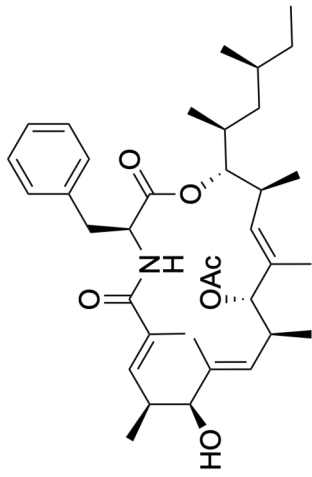

Metacridamide A (1a')  
(Revised structure)

<sup>13</sup>C NMR

(150 MHz, CDCl<sub>3</sub>)

136.8867  
136.8689  
136.8588  
130.9354  
130.7605  
129.6648  
128.4445  
126.7943  
124.0841

82.5693  
81.1813  
78.1496

52.8409

39.9347  
38.4563  
36.2705  
35.2711  
33.5180  
33.3347  
31.0796  
29.6773  
27.3927  
21.1863  
20.2847  
19.2070  
18.0359  
15.9384  
15.8166  
14.8990  
13.3754  
12.9426  
10.6198

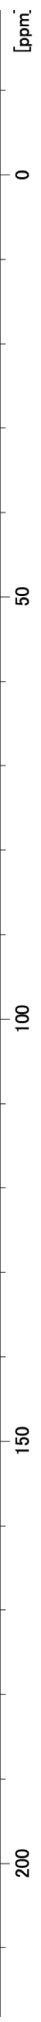





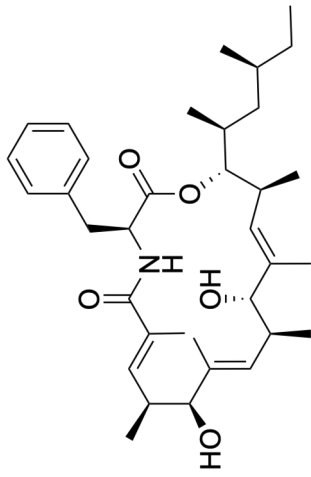

Metacridamide B (1b')  
(Revised structure)

<sup>13</sup>C NMR

(150 MHz, CD<sub>3</sub>OD)

M 206.180  
M 196.154  
M 191.626  
M 16.1047  
M 15.9028  
M 14.9889  
M 13.5543  
M 13.3949  
M 11.5671

M 29.3019  
M 32.8271  
M 35.0749  
M 35.3660  
M 36.6435  
M 37.0963  
M 40.5407  
M 42.1416

M 54.2214

M 79.1780  
M 80.8327  
M 83.5128

M 127.2702  
M 127.4546  
M 129.2937  
M 130.1931  
M 130.2200  
M 132.4012  
M 135.8681  
M 136.1652  
M 136.8256  
M 139.3679

M 172.9305  
M 172.4682

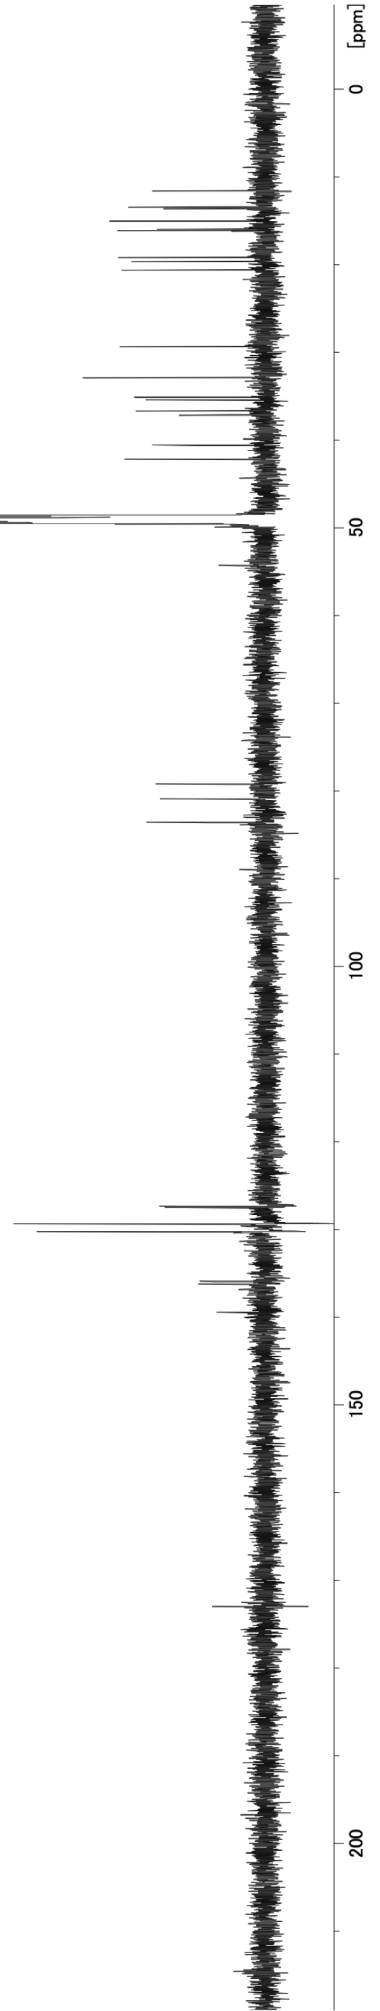

Supplement: d3cc01694c1.pdf [file d3cc01694c1.pdf]
